# Supplementary material
Source: publisher site journal article supplement (https://www.dovepress.com/article/398431)
Supplement: Supplementary file 1 [file get_supplementary_file.php]

## Supplementary Figures

- Figure S1
- Figure S2
- Figure S3

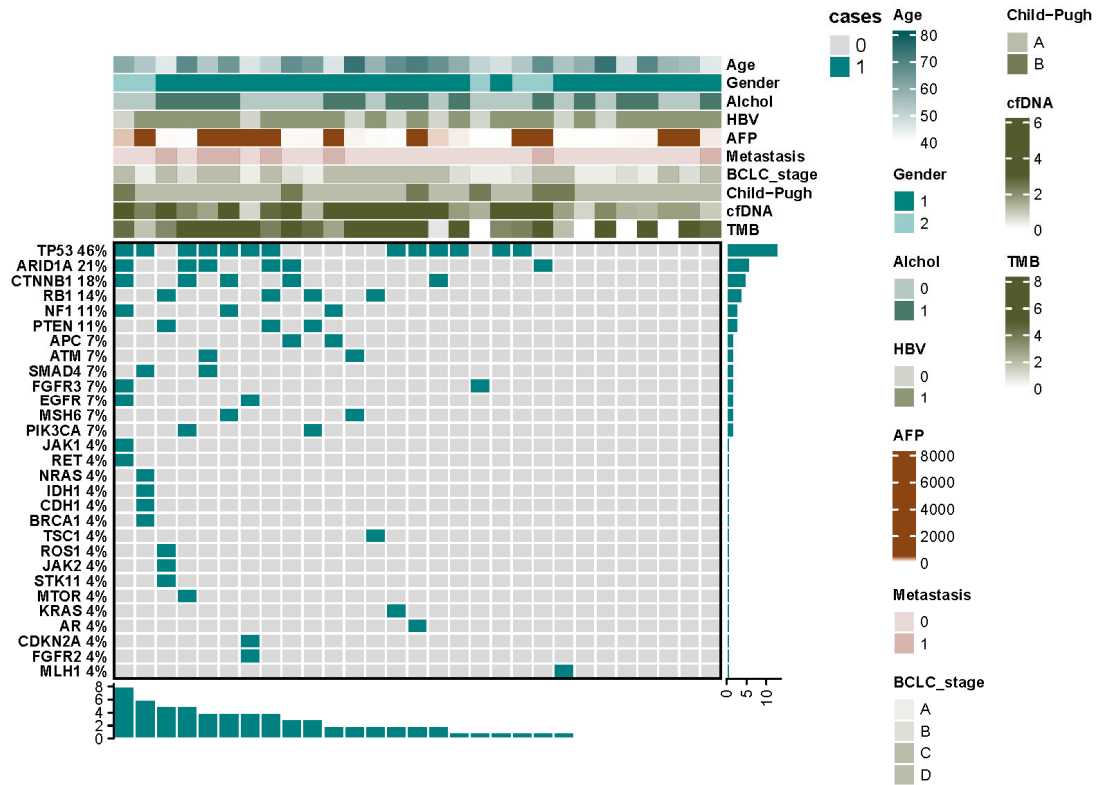

**Figure S1.** The gene mutation landscape of 30 patients from the in-house cohort.

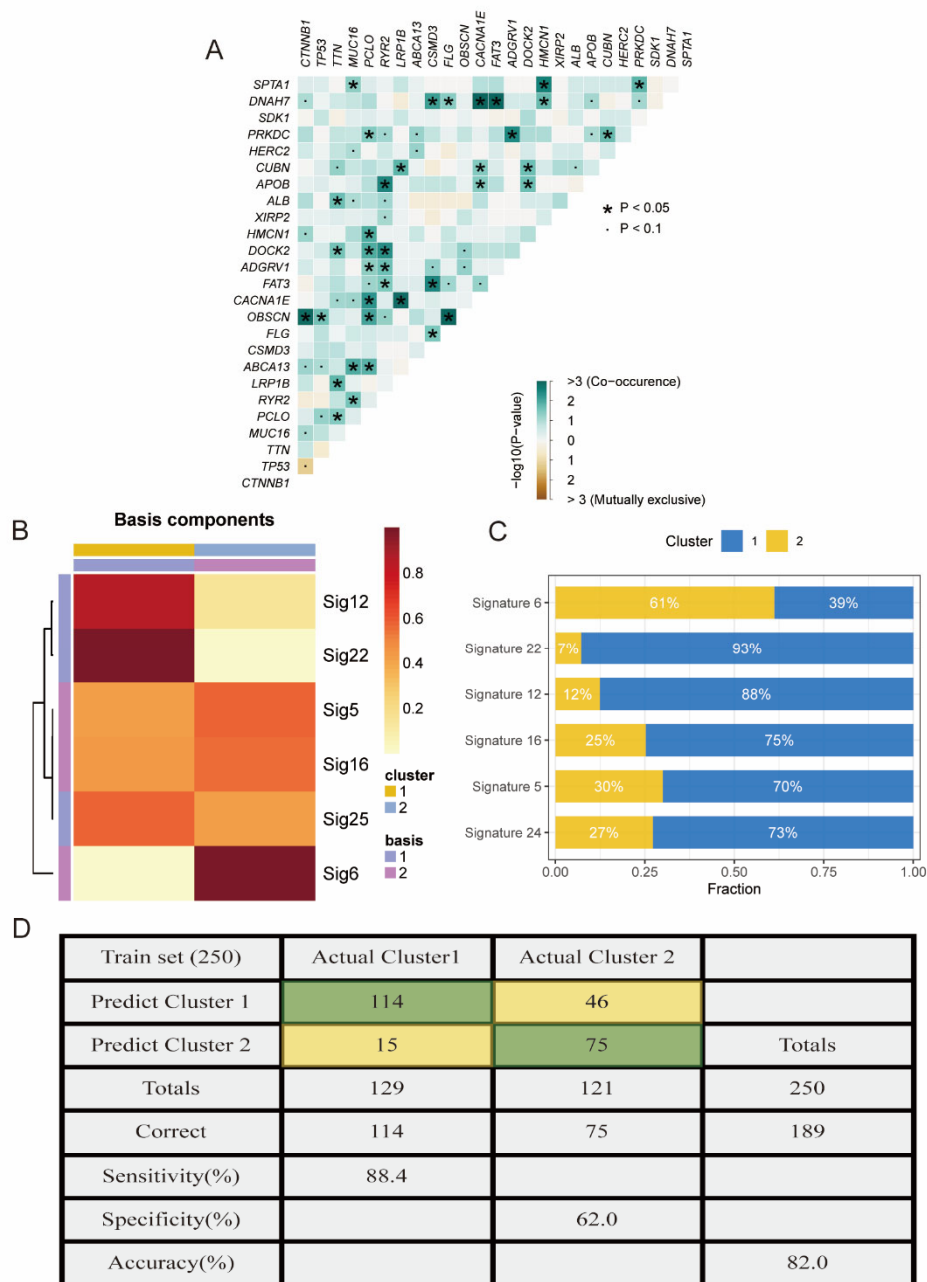

**Figure S2.** Mutation signature landscape in two MSCs. **A** Co-occurrence and mutually exclusive in the top 25 genes. **B** Basis components of NMF with rank =2 in TCGA LIHC cohort. **C** The fraction of six extracted mutation signatures in two MSCs. **D** The confusion matrix of the MSC predictor in the TCGA train set. \* $P < 0.05$ .

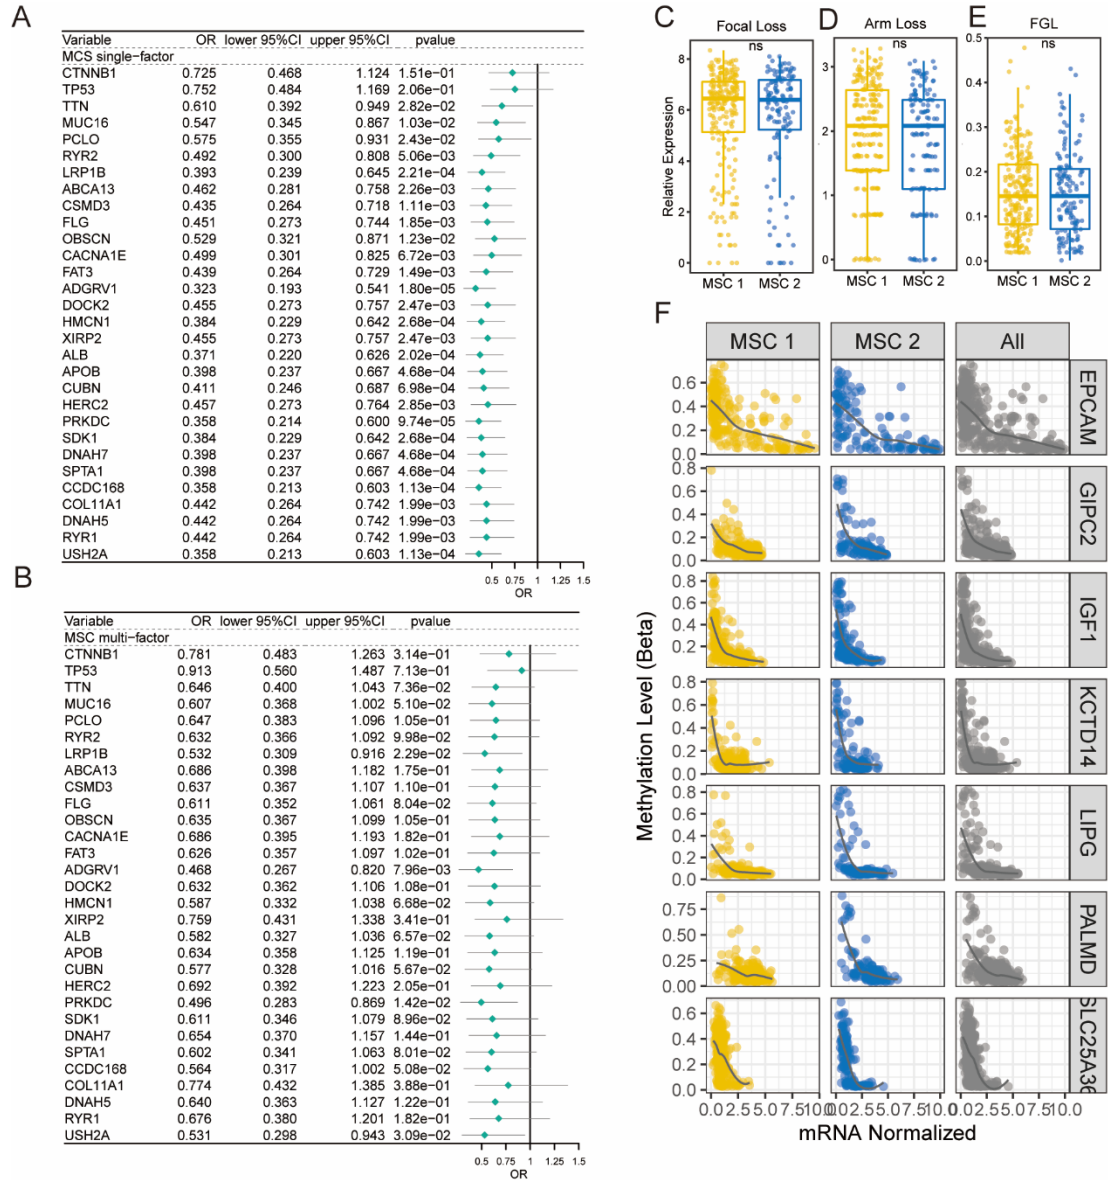

**Figure S3.** The multi-omics landscape of the MSCs. **A-B** Univariate Cox regression analysis of the top 30 FMGs (**A**), FHGs (**B**). **C-E** Differences in focal loss (**C**), arm loss (**D**), and FGL (**E**) between two CMSs. **F** The relationship of methylation levels and expression levels of methylation drive genes in CMS1, CMS2, and all samples.

## **Supplementary tables**

- **Table S1**
- **Table S2**
- **Table S3**
- **Table S4**
- **Table S5**
- **Table S6**
- **Table S7**
- **Table S8**
- **Table S9**
- **Table S10**
- **Table S11**

**Table S1. Univariate Cox regression analysis of OS in somatic mutations.**

| Gene   | P value  | HR        |
|--------|----------|-----------|
| APC    | 0.439428 | 2.292542  |
| NF1    | 0.001735 | 13.788627 |
| ARID1A | 0.497208 | 1.575452  |
| ATM    | 0.073950 | 4.166601  |
| TP53   | 0.319357 | 1.777155  |
| SMAD4  | 0.687872 | 0.656918  |
| JAK1   | 0.022030 | 25.495098 |
| CTNNB1 | 0.343957 | 1.888524  |
| FGFR3  | 0.994624 | 1.007093  |
| EGFR   | 0.389205 | 2.519012  |
| RET    | 0.022030 | 25.495098 |
| MSH6   | 0.007903 | 10.128582 |
| TSC1   | 0.069218 | 8.153897  |
| RB1    | 0.214493 | 2.833713  |
| ROS1   | 0.111709 | 5.924447  |
| JAK2   | 0.111709 | 5.924447  |
| PTEN   | 0.724548 | 1.462041  |
| STK11  | 0.111709 | 5.924447  |
| MTOR   | 0.790929 | 1.322531  |
| PIK3CA | 0.941664 | 1.079797  |
| KRAS   | 0.655849 | 1.602118  |
| AR     | 0.294009 | 3.074113  |

**Table S2. Clinical characteristics of two MSC in TCGA cohort and Cox regression analysis for predictors of OS and RFS.**

|                            | MSC 1              | MSC 2                | <i>P</i>     |
|----------------------------|--------------------|----------------------|--------------|
| n                          | 226                | 130                  |              |
| Age (mean (SD))            | 59.58 (12.10)      | 58.33 (15.68)        | 0.403        |
| Gender = Male (%)          | 167 (73.9)         | 72 ( 55.4)           | <b>0.001</b> |
| pT = T 3 4 (%)             | 136 (60.2)         | 71 ( 54.6)           | 0.361        |
| Stage = Stage III IV (%)   | 137 (60.6)         | 72 ( 55.4)           | 0.393        |
| Child_pugh = C (%)         | 117 (51.8)         | 59 ( 45.4)           | 0.294        |
| AFP (mean (SD))            | 5090.78 (21823.13) | 24781.15 (181981.16) | 0.109        |
| Bilirubin (mean (SD))      | 0.87 (0.71)        | 1.20 (2.07)          | 0.028        |
| Creatinine (mean (SD))     | 2.28 (10.15)       | 3.97 (16.04)         | 0.224        |
| Grade = G3 4 (%)           | 150 (66.4)         | 82 ( 63.1)           | 0.608        |
| Height (mean (SD))         | 167.38 (10.94)     | 167.02 (9.83)        | 0.758        |
| Mutation Count (mean (SD)) | 108.87 (121.19)    | 81.10 (109.37)       | <b>0.032</b> |
| PB (mean (SD))             | 4.04 (4.73)        | 4.53 (5.42)          | 0.374        |
| Vascular invasion (%)      | 81 (35.8)          | 42 ( 32.3)           | 0.576        |

**Multivariate Cox regression in OS**

|                   | Coef     | HR(95%CI)                   | <i>P</i>        |
|-------------------|----------|-----------------------------|-----------------|
| Mutation Count    | 0.001660 | 1.001662(1.000683,1.002642) | <b>0.000874</b> |
| Vascular invasion | 0.131261 | 1.140265(0.779594,1.667797) | 0.498670        |
| MSC 1             | 0.499388 | 1.647712(1.103966,2.459274) | <b>0.014524</b> |
| Stage III IV      | 0.687760 | 1.989255(1.330359,2.974487) | <b>0.000806</b> |

**Multivariate Cox regression in RFS**

|                   | Coef     | HR                          | <i>P</i>        |
|-------------------|----------|-----------------------------|-----------------|
| Mutation Count    | 0.001507 | 1.001508(1.000515,1.002502) | <b>0.002910</b> |
| Vascular invasion | 0.355531 | 1.426939(1.075433,1.893334) | <b>0.013741</b> |
| MSC 1             | 0.218395 | 1.244078(0.933572,1.657857) | 0.136023        |
| Stage III IV      | 0.303575 | 1.354693(1.018065,1.802627) | <b>0.037269</b> |

**Notes:** The P-values less than 0.05 are in bold.

**Abbreviations:** MSC, mutation signature cluster; OS, overall survival; RFS, relapse-free survival.

**Table S3. Common genes in all cohort with AUC > 0.60.**

|          |           |         |         |
|----------|-----------|---------|---------|
| ABI3BP   | FLII      | PDGFRB  | UNC5C   |
| ABR      | FLRT2     | PDZRN3  | UQCRC1  |
| ACSM1    | FMNL2     | PDZRN4  | USP13   |
| ACTA2    | FMOD      | PEF1    | USP48   |
| ACTR5    | FOXD2     | PELI2   | UTY     |
| ADAM7    | FOXF1     | PFDN6   | VAMP1   |
| ADAMTS1  | FOXF2     | PFKFB4  | VCL     |
| ADAMTS12 | FSCN1     | PGR     | VCX     |
| ADAMTS2  | FSTL3     | PHF7    | VGLL1   |
| ADAMTS20 | FUT8      | PHKG1   | VPS16   |
| ADAMTSL2 | FZD1      | PHLDB1  | VPS33A  |
| ADARB2   | FZD7      | PICALM  | VSNL1   |
| ADCY3    | FZD8      | PIGH    | WDFY3   |
| AEBP1    | GABBR1    | PITPNA  | WDR1    |
| AK2      | GABRA3    | PITPNM3 | WFDC1   |
| AKAP10   | GABRP     | PKDREJ  | WNT2    |
| AKAP11   | GAL       | PKNOX2  | XYLT1   |
| AKR1A1   | GALE      | PLA2R1  | YARS    |
| AKR7A2   | GALNT3    | PLAT    | YTHDC1  |
| AKT3     | GALNT7    | PLD2    | ZBTB17  |
| ALDH1A3  | GAS1      | PLEKHA2 | ZBTB3   |
| ALKBH4   | GAS2      | PLN     | ZBTB44  |
| ALOX5    | GCG       | PLOD1   | ZFHX4   |
| AMBP     | GDAP1     | PMF1    | ZFYVE26 |
| AMOTL2   | GDF10     | PMP22   | ZMIZ1   |
| AMPH     | GEM       | PNMA2   | ZMYM6   |
| ANGPT4   | GFPT2     | PODNL1  | ZMYND10 |
| ANKHD1   | GJB3      | POLE2   | ZNF174  |
| ANTXR1   | GLI2      | POLR3G  | ZNF212  |
| ANXA3    | GLMN      | POMGNT1 | ZNF214  |
| ANXA4    | GLP2R     | POP5    | ZNF324  |
| AP1G2    | GLT8D2    | POSTN   | ZNF365  |
| APBA2    | GNA11     | PPFIA3  | ZNF544  |
| APOC1    | GNL2      | PPFIBP1 | ZNF592  |
| APOC4    | GPATCH1   | PPIE    | ZNF76   |
| APOM     | GPATCH3   | PPIF    | ZNF764  |
| APP      | GPC4      | PPM1H   | ZSCAN2  |
| ARHGEF10 | GPR27     | PPP1R8  |         |
| ARHGEF17 | GPRASP1   | PRDM16  |         |
| ARHGEF4  | GRIN2A    | PRELP   |         |
| ARL5A    | GRIN2C    | PRIM1   |         |
| ARMCX2   | GSPT2     | PRKAR2A |         |
| ARMCX3   | GSTK1     | PRKG1   |         |
| ARMCX6   | GTF2B     | PRMT2   |         |
| ARSA     | GUCY1A3   | PROM1   |         |
| ASPN     | GUCY1B3   | PRPSAP1 |         |
| ASTE1    | HAND2     | PRSS23  |         |
| ATP10A   | HAS2      | PRSS8   |         |
| ATP2C2   | HCN4      | PSMB2   |         |
| ATPIF1   | HEPH      | PSMC2   |         |
| AXL      | HEXA      | PSMC3   |         |
| B3GNT2   | HEYL      | PSME2   |         |
| BASP1    | HHLA3     | PTBP2   |         |
| BGN      | HIF1A     | PTGIR   |         |
| BMPER    | HIRIP3    | PTGIS   |         |
| BMPR2    | HIST1H1B  | PTGS2   |         |
| BNC1     | HIST1H2AB | PTK7    |         |
| BSN      | HIST1H2BL | PTPN13  |         |
| BTG1     | HIST1H3C  | PTPRS   |         |
| BTG2     | HMGN3     | PXDN    |         |

|          |          |          |
|----------|----------|----------|
| C1orf50  | HOXB2    | PYGO1    |
| C1QTNF1  | HOXB3    | RAB20    |
| CACNA1H  | HSPBAP1  | RAB28    |
| CACNA2D1 | HUNK     | RAB36    |
| CADPS    | ID4      | RAB6A    |
| CAMTA2   | IFNGR2   | RAI1     |
| CAP2     | IGF2     | RAI2     |
| CASP6    | IGFALS   | RANBP2   |
| CASP9    | IGFBP5   | RARG     |
| CBL      | IGFBP7   | RASL11B  |
| CCDC106  | IKZF2    | RBM23    |
| CCDC134  | IL12RB2  | RBMS3    |
| CCDC40   | IL20RA   | RBP4     |
| CCHCR1   | IPO13    | RET      |
| CCL8     | IQCC     | RGS11    |
| CCNA1    | ISLR     | RING1    |
| CCNG2    | ISYNA1   | RPP40    |
| CCNI     | ITGB3BP  | RPUSD2   |
| CCNJL    | ITIH5    | RUSC2    |
| CD207    | JAG1     | S100BPB  |
| CD28     | JPH2     | SAMD14   |
| CDCP1    | KCND1    | SCD5     |
| CDH1     | KCNIP1   | SCML2    |
| CDH9     | KCNJ16   | SCTR     |
| CDK2AP1  | KCTD12   | SDCCAG8  |
| CDK5RAP1 | KIAA0753 | SDK1     |
| CDK5RAP2 | KIAA1644 | SDK2     |
| CDKAL1   | KIF26B   | SEC13    |
| CDKN2A   | KIRREL   | SEC14L4  |
| CDKN2C   | KLF7     | SEMA3C   |
| CELSR3   | KLF8     | SEMA4C   |
| CETN1    | KLHL3    | 11-Sep   |
| CGRRF1   | KLHL9    | 2-Sep    |
| CHGA     | KLK2     | 7-Sep    |
| CHODL    | LAMA1    | SF3A3    |
| CHST3    | LAMA2    | SFMBT1   |
| CLEC11A  | LAMA5    | SFRP1    |
| CLN8     | LAMB1    | SFRP5    |
| CLSTN2   | LAS1L    | SFTPC    |
| CNOT4    | LBH      | SH3YL1   |
| COL10A1  | LDOC1    | SIRT4    |
| COL14A1  | LHFP     | SIRT7    |
| COL16A1  | LIFR     | SLC12A5  |
| COL1A1   | LIN7B    | SLC17A3  |
| COL1A2   | LOXL1    | SLC22A17 |
| COL3A1   | LRFN4    | SLC24A3  |
| COL4A2   | LRRC17   | SLC25A36 |
| COL5A1   | LRRC32   | SLC26A10 |
| COL6A1   | LRRK1    | SLC28A3  |
| COL6A2   | LTBP1    | SLC34A2  |
| COL6A3   | LTBP2    | SLC38A6  |
| COMMD3   | LTBP4    | SLC6A6   |
| COMMD4   | LTK      | SLC7A9   |
| COMMD9   | LUM      | SLC9A6   |
| COMP     | LY6E     | SLCO3A1  |
| COPS6    | MAGEA12  | SLCO4A1  |
| CPNE7    | MAGEA4   | SLIT2    |
| CPZ      | MAGEA6   | SNIP1    |
| CRISPLD2 | MAGEA8   | SNRPC    |
| CRMP1    | MAGEB1   | SNX11    |
| CSPG5    | MAGEB2   | SNX19    |
| CSTF2    | MAGOH    | SOD3     |



|          |         |          |
|----------|---------|----------|
| CTAG2    | MAP2K1  | SPEG     |
| CTBP2    | MAP3K13 | SPG20    |
| CTNNB1   | MAP9    | SPINK5   |
| CTR9     | MAPK10  | SPINT2   |
| CTSK     | MBOAT2  | SRPX     |
| CUTA     | MCM5    | SRPX2    |
| CUZD1    | MECR    | SSPN     |
| CXCL12   | MED18   | SST      |
| CXCL14   | MED8    | SSX1     |
| CYB561   | MFAP4   | SSX2     |
| CYP1B1   | MGP     | ST7L     |
| CYP2J2   | MKNK1   | STOM     |
| DAPK2    | MMP28   | STON1    |
| DARS     | MN1     | SUSD4    |
| DAXX     | MORN1   | SUSD5    |
| DCN      | MPI     | SUV39H1  |
| DCTD     | MRC2    | SVEP1    |
| DDR2     | MRPS22  | SVIL     |
| DDX3X    | MTMR14  | SYDE1    |
| DENND3   | MUTYH   | SYNPO    |
| DHDDS    | MXRA5   | TAF12    |
| DHRS3    | MXRA8   | TAF9     |
| DHX57    | MYB     | TAGLN    |
| DIO3     | MYH11   | TANC2    |
| DKK2     | MYL9    | TBX2     |
| DMRTB1   | MYO10   | TBXA2R   |
| DNAJA4   | MYO1C   | TCAP     |
| DPH2     | MYO1D   | TCF21    |
| DTX4     | NAT6    | TCF7     |
| DYNC1I2  | NBEA    | TF       |
| E4F1     | NCAPH2  | TGFA     |
| EAF2     | NCK2    | TGFB1    |
| EBNA1BP2 | NCKIPSD | TGFB3    |
| ECHDC3   | NCOR1   | TGFBRAP1 |
| ECM1     | NDST4   | TGM3     |
| EDC3     | NEDD4L  | THAP3    |
| EDNRA    | NFKB1   | THBD     |
| EFEMP2   | NFYC    | THBS1    |
| EFNB3    | NGDN    | THBS2    |
| EFS      | NGFR    | TIGD6    |
| EHD3     | NINJ2   | TIMP2    |
| EIF1AX   | NIT1    | TINAGL1  |
| EIF2B3   | NME5    | TIPIN    |
| EIF2B4   | NME7    | TM6SF1   |
| EIF2B5   | NOTCH1  | TM9SF3   |
| EIF2S3   | NOTCH3  | TMEM158  |
| ELF1     | NPTX1   | TMEM39B  |
| ELMO3    | NPTX2   | TMEM51   |
| ELN      | NPTXR   | TNC      |
| ELP4     | NPY5R   | TNNT2    |
| EMILIN1  | NQO2    | TNS1     |
| ENDOD1   | NRL     | TNS3     |
| ENTPD1   | NSDHL   | TOE1     |
| EPB41L4A | NSFL1C  | TP73     |
| EPHA3    | NSMCE2  | TPBG     |
| ERCC8    | NTRK2   | TPM4     |
| EVC      | NUDC    | TRAIP    |
| EXOSC10  | NXN     | TRAPPC3  |
| F2R      | OGFRL1  | TRERF1   |
| F3       | OGG1    | TRIM17   |
| FABP7    | OGN     | TRIT1    |
| FAF1     | OLFML3  | TRPM1    |

|         |          |        |
|---------|----------|--------|
| FAM102A | PAFAH1B2 | TRPV4  |
| FAM57A  | PAGE1    | TSPAN2 |
| FAM65A  | PALM     | TTC19  |
| FANCA   | PARP2    | TTC23  |
| FARS2   | PBX1     | TTC4   |
| FBLN2   | PCBP3    | TTYH1  |
| FBN1    | PCDH7    | TUBB3  |
| FBXO42  | PCDHGA12 | TUBB6  |
| FCHSD2  | PCDHGC3  | TUT1   |
| FCN3    | PCGF3    | TWSG1  |
| FEZ1    | PDE1A    | UBE2G1 |
| FGF16   | PDE3A    | UBE2O  |
| FGFR1   | PDE5A    | UFD1L  |
| FHOD3   | PDE9A    | ULK2   |
| FKBP9   | PDGFB    | UMOD   |

---

**Table S4. Selected gene pairs and the corresponding coefficient.**

| <b>Gene pair</b> | <b>coefficient</b> |
|------------------|--------------------|
| ACSM1 IGFALS     | -0.086619064       |
| ALKBH4 TTC19     | -0.049502986       |
| C1orf50 PRMT2    | -0.088819868       |
| CCL8 FEZ1        | -0.063474111       |
| CDK5RAP2 CYB561  | -0.050336217       |
| CDK5RAP2 SEPT11  | -0.013964313       |
| CDKAL1 ZBTB44    | -0.016344191       |
| CDKN2C IGFALS    | -0.012260936       |
| CGRRF1 CLN8      | -0.007150271       |
| CHGA GAL         | -0.019547761       |
| CTR9 TNS3        | -0.081773192       |
| CUZD1 NME5       | -0.00414488        |
| GPATCH1 LTBP1    | -0.008672178       |
| GPATCH3 MYO1D    | -0.050406826       |
| GTF2B PITPNA     | -0.024163817       |
| IKZF2 PDZRN3     | -0.056021814       |
| IQCC KLF7        | -0.040442964       |
| MAGOH RAB20      | -0.006572587       |
| MYB SUSD5        | -0.011397993       |
| NINJ2 SEC14L4    | -0.042866993       |
| OGG1 SDCCAG8     | -0.013044519       |
| PKDREJ WNT2      | -0.002710877       |

**Table S5. Enrichment terms of GO, KEGG and Hallmark.**

| GO                                                 |                 |                 |
|----------------------------------------------------|-----------------|-----------------|
| Description                                        | enrichmentScore | <i>P</i> adjust |
| GOBP_AMEBOIDAL_TYPE_CELL_MIGRATION                 | -0.503046098    | 1.22E-08        |
| GOBP_AXON_DEVELOPMENT                              | -0.507281281    | 1.22E-08        |
| GOBP_CARTILAGE_DEVELOPMENT                         | -0.601449435    | 1.22E-08        |
| GOBP_CELLULAR_AMINO_ACID_METABOLIC_PROCESS         | 0.509027038     | 1.22E-08        |
| GOBP_CELL_CELL_JUNCTION_ORGANIZATION               | -0.578959587    | 1.22E-08        |
| GOBP_CELL_CELL_SIGNALING_BY_WNT                    | -0.461491932    | 1.22E-08        |
| GOBP_CELL_JUNCTION_ASSEMBLY                        | -0.497825523    | 1.22E-08        |
| GOBP_CELL_SUBSTRATE_ADHESION                       | -0.542398535    | 1.22E-08        |
| GOBP_CHROMOSOME_SEGREGATION                        | 0.496803881     | 1.22E-08        |
| GOBP_COLLAGEN_FIBRIL_ORGANIZATION                  | -0.781316571    | 1.22E-08        |
| GOBP_CONNECTIVE_TISSUE_DEVELOPMENT                 | -0.589174973    | 1.22E-08        |
| GOBP_DNA_REPAIR                                    | 0.432095266     | 1.22E-08        |
| GOBP_EMBRYONIC_ORGAN_DEVELOPMENT                   | -0.459761924    | 1.22E-08        |
| GOBP_EPITHELIAL_CELL_PROLIFERATION                 | -0.477255752    | 1.22E-08        |
| GOBP_EPITHELIAL_TUBE_MORPHOGENESIS                 | -0.517641992    | 1.22E-08        |
| GOBP_EXTERNAL_ENCAPSULATING_STRUCTURE_ORGANIZATION | -0.674635546    | 1.22E-08        |
| GOBP_EXTRACELLULAR_MATRIX_ASSEMBLY                 | -0.842303167    | 1.22E-08        |
| GOBP_FATTY_ACID_METABOLIC_PROCESS                  | 0.454364173     | 1.22E-08        |
| GOBP_HEART_MORPHOGENESIS                           | -0.547887242    | 1.22E-08        |
| GOBP_MITOTIC_SISTER_CHROMATID_SEGREGATION          | 0.565495878     | 1.22E-08        |

KEGG

| Description                                       | NES          | P adjust    |
|---------------------------------------------------|--------------|-------------|
| KEGG_ECM_RECEPTOR_INTERACTION                     | -2.304902728 | 9.20E-09    |
| KEGG_FOCAL_ADHESION                               | -2.313824754 | 9.20E-09    |
| KEGG_PATHWAYS_IN_CANCER                           | -1.818197456 | 3.87E-07    |
| KEGG_PEROXISOME                                   | 2.192461811  | 1.31E-06    |
| KEGG_PPAR_SIGNALING_PATHWAY                       | 2.144661288  | 1.24E-05    |
| KEGG_CYTOKINE_CYTOKINE_RECEPTOR_INTERACTION       | -1.766853983 | 1.91E-05    |
| KEGG_REGULATION_OF_ACTIN_CYTOSKELETON             | -1.776692188 | 5.40E-05    |
| KEGG_RETINOL_METABOLISM                           | 2.08809515   | 9.29E-05    |
| KEGG_BUTANOATE_METABOLISM                         | 2.127994978  | 9.65E-05    |
| KEGG_DNA_REPLICATION                              | 2.068685514  | 0.000155373 |
| KEGG_TGF_BETA_SIGNALING_PATHWAY                   | -1.942495927 | 0.000180395 |
| KEGG_LEISHMANIA_INFECTON                          | -1.979199335 | 0.000269263 |
| KEGG_DILATED_CARDIOMYOPATHY                       | -1.910398095 | 0.000309267 |
| KEGG_PROTEASOME                                   | 1.963707471  | 0.00035496  |
| KEGG_DRUG_METABOLISM_OTHER_ENZYMES                | 1.957944033  | 0.00035496  |
| KEGG_COMPLEMENT_AND_COAGULATION_CASCADES          | 1.909366646  | 0.000478584 |
| KEGG_LEUKOCYTE_TRANSENDOTHELIAL_MIGRATION         | -1.808717976 | 0.000508974 |
| KEGG_METABOLISM_OF_XENOBIOTICS_BY_CYTOCHROME_P450 | 1.904170587  | 0.0005112   |
| KEGG_DRUG_METABOLISM_CYTOCHROME_P450              | 1.898651803  | 0.000650177 |
| KEGG_GLYCINE_SERINE_AND_THREONINE_METABOLISM      | 1.958615491  | 0.000677703 |
| KEGG_FC_GAMMA_R_MEDIATED_PHAGOCYTOSIS             | -1.814071463 | 0.000729739 |
| KEGG_STEROID_HORMONE_BIOSYNTHESIS                 | 1.880101541  | 0.001117503 |
| KEGG_AXON_GUIDANCE                                | -1.72437545  | 0.001734274 |
| KEGG_MAPK_SIGNALING_PATHWAY                       | -1.537630321 | 0.001821479 |
| KEGG_PRIMARY_BILE_ACID_BIOSYNTHESIS               | 1.949093767  | 0.001859876 |
| KEGG_HYPERTROPHIC_CARDIOMYOPATHY_HCM              | -1.74479628  | 0.002043853 |
| KEGG_GNRH_SIGNALING_PATHWAY                       | -1.732495862 | 0.002228053 |
| KEGG_WNT_SIGNALING_PATHWAY                        | -1.611401353 | 0.002526688 |
| KEGG_RENAL_CELL_CARCINOMA                         | -1.777920183 | 0.002576971 |
| KEGG_NEUROTROPHIN_SIGNALING_PATHWAY               | -1.681540652 | 0.002576971 |
| KEGG_JAK_STAT_SIGNALING_PATHWAY                   | -1.598128587 | 0.002598794 |
| KEGG_VASCULAR_SMOOTH_MUSCLE_CONTRACTION           | -1.6271728   | 0.002965363 |
| KEGG_BASE_EXCISION_REPAIR                         | 1.828184669  | 0.003326792 |
| KEGG_TERPENOID_BACKBONE_BIOSYNTHESIS              | 1.933651561  | 0.00368829  |
| KEGG_STEROID_BIOSYNTHESIS                         | 1.862849313  | 0.003746076 |
| KEGG_NOTCH_SIGNALING_PATHWAY                      | -1.773213585 | 0.003746076 |
| KEGG_SMALL_CELL_LUNG_CANCER                       | -1.705416099 | 0.003746076 |
| KEGG_PENTOSE_AND_GLUCURONATE_INTERCONVERSIONS     | 1.781557396  | 0.004761062 |

|                                                        |                     |                    |
|--------------------------------------------------------|---------------------|--------------------|
| KEGG_NUCLEOTIDE_EXCISION_REPAIR                        | 1.747510609         | 0.009593394        |
| KEGG_CELL_CYCLE                                        | 1.550237826         | 0.009741113        |
| KEGG_PYRIMIDINE_METABOLISM                             | 1.600149928         | 0.009741113        |
| KEGG_CALCIIUM_SIGNALING_PATHWAY                        | -1.503438408        | 0.010029393        |
| KEGG_MELANOGENESIS                                     | -1.601732           | 0.010029393        |
| KEGG_PORPHYRIN_AND_CHLOROPHYLL_METABOLISM              | 1.689670117         | 0.010029393        |
| KEGG_HEDGEHOG_SIGNALING_PATHWAY                        | -1.638121655        | 0.012732949        |
| KEGG_VALINE_LEUCINE_AND_ISOLEUCINE_DEGRADATION         | 1.620719286         | 0.013123614        |
| KEGG_CHRONIC_MYELOID_LEUKEMIA                          | -1.634483296        | 0.013127912        |
| KEGG_ABC_TRANSPORTERS                                  | 1.690079969         | 0.013185188        |
| KEGG_LYSINE_DEGRADATION                                | 1.684482095         | 0.01407195         |
| KEGG_O_GLYCAN_BIOSYNTHESIS                             | -1.65480244         | 0.015422931        |
| KEGG_LINOLEIC_ACID_METABOLISM                          | 1.664981314         | 0.020506959        |
| KEGG_FATTY_ACID_METABOLISM                             | 1.541041691         | 0.020847281        |
| KEGG_PROSTATE_CANCER                                   | -1.572627739        | 0.022469818        |
| KEGG_HOMOLOGOUS_RECOMBINATION                          | 1.689369125         | 0.023783131        |
| KEGG_NEUROACTIVE_LIGAND_RECEPTOR_INTERACTION           | -1.397859073        | 0.024913939        |
| KEGG_MISMATCH_REPAIR                                   | 1.679435772         | 0.026991437        |
| KEGG_ERBB_SIGNALING_PATHWAY                            | -1.515727305        | 0.032368354        |
| KEGG_STARCH_AND_SUCROSE_METABOLISM                     | 1.519082997         | 0.033747188        |
| KEGG_ASCORBATE_AND_ALDARATE_METABOLISM                 | 1.564310193         | 0.033747188        |
| KEGG_GAP_JUNCTION                                      | -1.480574831        | 0.040118419        |
| KEGG_BLADDER_CANCER                                    | -1.518337022        | 0.040544145        |
| KEGG_APOPTOSIS                                         | -1.469066035        | 0.040922831        |
| KEGG_CELL_ADHESION_MOLECULES_CAMS                      | -1.412476157        | 0.041289619        |
| KEGG_VIRAL_MYOCARDITIS                                 | -1.492299994        | 0.041882287        |
| KEGG_CHEMOKINE_SIGNALING_PATHWAY                       | -1.398771771        | 0.045211802        |
| KEGG_TRYPTOPHAN_METABOLISM                             | 1.531312202         | 0.045329303        |
| <u>ARRHYTHMOGENIC_RIGHT_VENTRICULAR_CARDIOMYOPATHY</u> | <u>-1.489727085</u> | <u>0.047160046</u> |

**HALLmarker**

| Description                                | logFC       | P adjust    |
|--------------------------------------------|-------------|-------------|
| HALLMARK_DNA_REPAIR                        | -0.07830454 | 0.000967533 |
| HALLMARK_PANCREAS_BETA_CELLS               | 0.054968678 | 0.016160203 |
| HALLMARK_UNFOLDED_PROTEIN_RESPONSE         | -0.05145596 | 0.016160203 |
| HALLMARK_KRAS_SIGNALING_DN                 | 0.031547678 | 0.019834245 |
| HALLMARK_MYOGENESIS                        | 0.060279429 | 0.032832973 |
| HALLMARK_REACTIVE_OXYGEN_SPECIES_PATHWAY   | -0.04856825 | 0.12475714  |
| HALLMARK_APICAL_SURFACE                    | 0.042593552 | 0.130448724 |
| HALLMARK_G2M_CHECKPOINT                    | -0.05924452 | 0.136601447 |
| HALLMARK_HEDGEHOG_SIGNALING                | 0.058644294 | 0.136601447 |
| HALLMARK_EPITHELIAL_MESENCHYMAL_TRANSITION | 0.065961104 | 0.136601447 |
| HALLMARK_PI3K_AKT_MTOR_SIGNALING           | -0.02975136 | 0.136601447 |
| HALLMARK_E2F_TARGETS                       | -0.06848715 | 0.168763283 |
| HALLMARK_NOTCH_SIGNALING                   | 0.048934244 | 0.196594049 |
| HALLMARK_IL6_JAK_STAT3_SIGNALING           | 0.047372562 | 0.201709351 |
| HALLMARK_MTORC1_SIGNALING                  | -0.03954396 | 0.208819571 |
| HALLMARK_HYPOXIA                           | 0.030816205 | 0.228835408 |
| HALLMARK_OXIDATIVE_PHOSPHORYLATION         | -0.0387152  | 0.325836944 |
| HALLMARK_APICAL_JUNCTION                   | 0.026776646 | 0.325836944 |
| HALLMARK_GLYCOLYSIS                        | -0.02012059 | 0.408440178 |
| HALLMARK_MYC_TARGETS_V2                    | -0.04461324 | 0.408440178 |
| HALLMARK_XENOBIOTIC_METABOLISM             | -0.03459357 | 0.408440178 |
| HALLMARK_INTERFERON_ALPHA_RESPONSE         | -0.04080852 | 0.444493612 |
| HALLMARK_ANDROGEN_RESPONSE                 | -0.02051407 | 0.444493612 |
| HALLMARK_MYC_TARGETS_V1                    | -0.03631286 | 0.444493612 |
| HALLMARK_BILE_ACID_METABOLISM              | -0.03701625 | 0.444493612 |
| HALLMARK_WNT_BETA_CATENIN_SIGNALING        | -0.02777501 | 0.444493612 |
| HALLMARK_MITOTIC_SPINDLE                   | -0.02121296 | 0.444493612 |
| HALLMARK_INFLAMMATORY_RESPONSE             | 0.029770492 | 0.444493612 |
| HALLMARK_ESTROGEN_RESPONSE_LATE            | 0.015485091 | 0.500371772 |
| HALLMARK_P53_PATHWAY                       | -0.01322749 | 0.500371772 |
| HALLMARK_INTERFERON_GAMMA_RESPONSE         | -0.0290946  | 0.521283016 |
| HALLMARK_PEROXISOME                        | 0.015389527 | 0.534596497 |
| HALLMARK_COAGULATION                       | -0.02137661 | 0.634756862 |
| HALLMARK_PROTEIN_SECRETION                 | -0.01666487 | 0.640024096 |
| HALLMARK_TNFA_SIGNALING_VIA_NFKB           | 0.019149046 | 0.646871118 |
| HALLMARK_ADIPOGENESIS                      | -0.01297881 | 0.651416008 |
| HALLMARK_KRAS_SIGNALING_UP                 | 0.008773754 | 0.762715106 |
| HALLMARK_HEME_METABOLISM                   | -0.00710641 | 0.787861434 |

|                                  |             |             |
|----------------------------------|-------------|-------------|
| HALLMARK TGF BETA SIGNALING      | 0.011600528 | 0.787861434 |
| HALLMARK CHOLESTEROL HOMEOSTASIS | -0.00860181 | 0.787861434 |
| HALLMARK FATTY ACID METABOLISM   | -0.01002188 | 0.787861434 |
| HALLMARK APOPTOSIS               | -0.0075566  | 0.787861434 |
| HALLMARK ESTROGEN RESPONSE EARLY | -0.00453947 | 0.886414215 |
| HALLMARK ALLOGRAFT REJECTION     | -0.00663172 | 0.900062956 |
| HALLMARK SPERMATOGENESIS         | 0.002845838 | 0.900062956 |
| HALLMARK UV RESPONSE UP          | -0.00260639 | 0.900062956 |
| HALLMARK ANGIOGENESIS            | 0.005780802 | 0.900062956 |
| HALLMARK COMPLEMENT              | -0.00317775 | 0.900062956 |
| HALLMARK UV RESPONSE DN          | -0.00204315 | 0.944395154 |
| HALLMARK IL2 STAT5 SIGNALING     | 0.000235854 | 0.99017797  |

---



**Table S6. Immune related indicators in TCHA-LIHC patients.**

|              | SNV.Neoantigens | Indel.Neoantigens | CTA.Score   | Intratumor.Heterogeneity | Number.of.Segments | Fraction.Altered |
|--------------|-----------------|-------------------|-------------|--------------------------|--------------------|------------------|
| TCGA-2V-A95S | 36              | 85                | NA          | 0.07                     | 84                 | 0.245784405      |
| TCGA-2Y-A9GS | 43              | 34                | 3.955155741 | 0.16                     | 109                | 0.719476541      |
| TCGA-2Y-A9GT | 35              | 17                | 1.171609984 | 0.01                     | 83                 | 0.062187446      |
| TCGA-2Y-A9GU | 59              | 53                | 1.031207748 | 0.05                     | 120                | 0.317505909      |
| TCGA-2Y-A9GV | 35              | 5                 | 0.863332684 | 0.01                     | 85                 | 0.092790726      |
| TCGA-2Y-A9GW | 42              | 74                | 1.197767759 | 0.11                     | 81                 | 0.776233756      |
| TCGA-2Y-A9GX | 23              | 120               | 1.397903253 | 0.07                     | 40                 | 0.174674088      |
| TCGA-2Y-A9GY | 23              | 5                 | 3.511003074 | 0.4                      | 203                | 0.696873558      |
| TCGA-2Y-A9GZ | 39              | 38                | 3.957740143 | 0.15                     | 353                | 0.890420828      |
| TCGA-2Y-A9H0 | 33              | 121               | 2.729933332 | 0.02                     | 620                | 0.206101593      |
| TCGA-2Y-A9H1 | 74              | 132               | 1.473894746 | 0.08                     | 93                 | 0.390791077      |
| TCGA-2Y-A9H2 | 22              | 5                 | 1.538601674 | 0.14                     | 142                | 0.80131409       |
| TCGA-2Y-A9H3 | 103             | 56                | 1.466532555 | 0.18                     | 158                | 0.591576833      |
| TCGA-2Y-A9H4 | 28              | 87                | 3.81712324  | 0.04                     | 186                | 0.281848534      |
| TCGA-2Y-A9H5 | 37              | 45                | 0.491726271 | 0.14                     | 88                 | 0.525677253      |
| TCGA-2Y-A9H6 | 28              | 5                 | 0.839067552 | 0.08                     | 239                | 0.260411914      |
| TCGA-2Y-A9H7 | 44              | 61                | 1.310943063 | 0.05                     | 101                | 0.160754987      |
| TCGA-2Y-A9H8 | 28              | 13                | 0.54417858  | 0.1                      | 176                | 0.545865574      |
| TCGA-2Y-A9H9 | 65              | 171               | 2.540084653 | 0.18                     | 348                | 0.26326484       |
| TCGA-2Y-A9HA | 42              | 10                | 5.291869039 | 0.18                     | 215                | 0.36492941       |
| TCGA-2Y-A9HB | 34              | 1                 | 1.129425241 | 0.09                     | 78                 | 0.158512707      |
| TCGA-3K-AAZ8 | 48              | 12                | 0.976951912 | 0.05                     | 77                 | 0.947535184      |
| TCGA-4R-AA8I | 460             | 1081              | 5.196854549 | 0.02                     | 164                | 0.181902114      |
| TCGA-5C-A9VG | 62              | 2                 | 0.911305108 | 0.12                     | 83                 | 0.65215662       |
| TCGA-5C-A9VH | 54              | 44                | 0.616695303 | 0.33                     | 82                 | 0.34193756       |
| TCGA-5C-AAPD | 27              | 1                 | 4.413602347 | 0.1                      | 146                | 0.816782584      |
| TCGA-5R-AA1C | 27              | 10                | 1.839524276 | 0.02                     | 106                | 0.820182385      |
| TCGA-5R-AA1D | 8               | NA                | 0.651140546 | 0.14                     | 45                 | 0.109028563      |
| TCGA-5R-AAAM | 32              | 15                | 1.120688503 | 0.11                     | 105                | 0.16448549       |
| TCGA-BC-4073 | 35              | 20                | 5.116809194 | 0                        | 617                | 0.074757118      |
| TCGA-BC-A10Q | 12              | 1                 | NA          | 0.05                     | 100                | 0.624196332      |
| TCGA-BC-A10R | 32              | 0                 | 3.102672333 | 0.1                      | 533                | 0.703043656      |
| TCGA-BC-A10T | 37              | 70                | 2.958244423 | 0.04                     | 558                | 0.262749604      |
| TCGA-BC-A10U | 52              | 167               | 2.979286993 | 0.07                     | 121                | 0.354116055      |
| TCGA-BC-A10W | 42              | 17                | 1.288064522 | 0.06                     | 132                | 0.276109502      |
| TCGA-BC-A10Y | 25              | NA                | 3.202137678 | 0.12                     | 767                | 0.280578723      |
| TCGA-BC-A10Z | 58              | 252               | 3.524981579 | 0                        | 786                | 0.201206881      |
| TCGA-BC-A216 | 28              | 1                 | 2.230385874 | 0.07                     | 567                | 0.209204918      |
| TCGA-BC-A217 | 45              | 10                | 4.254714142 | 0.27                     | 574                | 0.79188261       |

|              |     |     |             |      |     |             |
|--------------|-----|-----|-------------|------|-----|-------------|
| TCGA-BC-A3KF | 35  | 4   | 0.799379475 | 0.05 | 157 | 0.700815539 |
| TCGA-BC-A5W4 | 30  | 8   | 1.171903764 | 0.01 | 249 | 0.944510971 |
| TCGA-BC-A69H | 47  | 32  | 3.068849164 | 0.27 | 142 | 0.541832319 |
| TCGA-BC-A8YO | 22  | 90  | 2.204916882 | 0.01 | 506 | 0.146138485 |
| TCGA-BD-A2L6 | 28  | 16  | 2.724587864 | 0.98 | 170 | 0.153524309 |
| TCGA-BD-A3EP | 69  | 178 | 4.755113373 | 0.32 | 120 | 0.518902218 |
| TCGA-BW-A5NO | 52  | 16  | 3.982604753 | 0.55 | 469 | 0.671669915 |
| TCGA-BW-A5NQ | 42  | 53  | NA          | 0.01 | 57  | 0.880727287 |
| TCGA-CC-5258 | 75  | 264 | 0.982148489 | 0.03 | 191 | 0.445875657 |
| TCGA-CC-5260 | 31  | 9   | 2.10814455  | 0.1  | 164 | 0.317378982 |
| TCGA-CC-5262 | 59  | 9   | 2.747798436 | 0    | 79  | 0.145817735 |
| TCGA-CC-5263 | 70  | 3   | 3.64102167  | 0.14 | 515 | 0.390039904 |
| TCGA-CC-5264 | 49  | 18  | 3.741782895 | 0.23 | 160 | 0.817639981 |
| TCGA-CC-A1HT | 52  | 49  | 5.444076292 | 0.2  | 120 | 0.210070667 |
| TCGA-CC-A3M9 | 56  | 48  | 3.602366015 | 0.44 | 188 | 0.598569729 |
| TCGA-CC-A3MA | 23  | 53  | 1.204244069 | 0.08 | 167 | 0.891430677 |
| TCGA-CC-A3MB | 42  | 39  | 0.809002304 | 0.19 | 157 | 0.573792051 |
| TCGA-CC-A3MC | 33  | 37  | 1.162453765 | 0.42 | 114 | 0.571369497 |
| TCGA-CC-A5UC | 24  | 59  | 0.851047715 | 0.03 | 79  | 0.508275929 |
| TCGA-CC-A5UD | 62  | 14  | 1.374561976 | 0.01 | 96  | 0.946347609 |
| TCGA-CC-A5UE | 65  | 112 | 3.723518721 | 0.51 | 85  | 0.791883927 |
| TCGA-CC-A7IE | 79  | 98  | 1.55542874  | 0.08 | 146 | 0.855115209 |
| TCGA-CC-A7IF | 50  | 24  | 0.909085541 | 0.1  | 122 | 0.333608632 |
| TCGA-CC-A7IG | 66  | 10  | 0.848094794 | 0.44 | 143 | 0.749752041 |
| TCGA-CC-A7IH | 315 | 58  | 1.427574104 | 0.07 | 152 | 0.839505377 |
| TCGA-CC-A7II | 52  | 26  | 5.35136583  | 0.11 | 168 | 0.737283745 |
| TCGA-CC-A7IJ | 73  | 117 | 2.240673615 | 0.24 | 316 | 0.826713353 |
| TCGA-CC-A7IK | 137 | 17  | 4.538172747 | 0.11 | 151 | 0.775304309 |
| TCGA-CC-A7IL | 38  | 163 | 1.994545111 | 0.2  | 103 | 0.797315614 |
| TCGA-CC-A8HT | 99  | 95  | 4.945920921 | 0    | 161 | 0.207523994 |
| TCGA-CC-A8HU | 19  | 1   | 2.236721691 | 0.18 | 163 | 0.489821363 |
| TCGA-CC-A8HV | 65  | 191 | 1.066687815 | 0.2  | 400 | 0.814793975 |
| TCGA-CC-A9FS | 58  | 0   | 1.337351131 | 0.07 | 81  | 0.724439084 |
| TCGA-CC-A9FU | 27  | 52  | NA          | 0.14 | 161 | 0.920025443 |
| TCGA-CC-A9FV | 6   | 6   | NA          | 0    | 50  | 3.20E-05    |
| TCGA-CC-A9FW | 78  | 58  | 4.015373347 | 0.01 | 129 | 0.709235875 |
| TCGA-DD-A113 | 69  | 7   | 1.1586694   | 0.36 | 165 | 0.839269482 |
| TCGA-DD-A114 | 52  | 42  | 2.082359655 | 0.42 | 97  | 0.362153554 |
| TCGA-DD-A115 | 18  | 5   | 3.40980134  | 0.13 | 457 | 0.64092608  |
| TCGA-DD-A116 | 55  | 20  | 1.27360476  | 0.19 | 165 | 0.470111838 |
| TCGA-DD-A118 | 52  | 97  | 0.771426274 | 0.02 | 172 | 0.531631097 |

|              |     |     |             |      |     |             |
|--------------|-----|-----|-------------|------|-----|-------------|
| TCGA-DD-A119 | 35  | 1   | 0.711570906 | 0.51 | 97  | 0.41681225  |
| TCGA-DD-A11A | 71  | 30  | 3.704801488 | 0.21 | 386 | 0.931801192 |
| TCGA-DD-A11B | 20  | 29  | 0.782270983 | 0.02 | 78  | 0.91141736  |
| TCGA-DD-A11C | 47  | 97  | 3.258529678 | 0.25 | 752 | 0.537351065 |
| TCGA-DD-A11D | 54  | 247 | 2.197154729 | 0    | 552 | 0.178802896 |
| TCGA-DD-A1E9 | NA  | NA  | NA          | 0.32 | 95  | 0.484428971 |
| TCGA-DD-A1EA | NA  | NA  | 1.595668994 | NA   | 79  | 0.124734683 |
| TCGA-DD-A1EB | 91  | 78  | 0.90801145  | 0.01 | 394 | 0.111754884 |
| TCGA-DD-A1EC | 7   | NA  | 0.452772998 | 0    | 137 | 0.216544888 |
| TCGA-DD-A1ED | 8   | 99  | 1.410412607 | 0    | 41  | 3.54E-05    |
| TCGA-DD-A1EE | 366 | 411 | 0.793815766 | 0.13 | 60  | 0.198865442 |
| TCGA-DD-A1EF | 61  | 4   | 0.730751522 | 0.25 | 152 | 0.710027715 |
| TCGA-DD-A1EH | 17  | 5   | 1.016812433 | 0.28 | 53  | 0.46399297  |
| TCGA-DD-A1EI | 27  | 198 | 1.017196608 | 0.13 | 155 | 0.401671215 |
| TCGA-DD-A1EJ | 38  | 54  | 4.175529439 | 0.56 | 145 | 0.541367944 |
| TCGA-DD-A1EK | 36  | 0   | 4.040711223 | 0.02 | 451 | 0.175893672 |
| TCGA-DD-A1EL | 29  | 9   | 4.416595403 | 0.21 | 136 | 0.684494886 |
| TCGA-DD-A39V | 38  | 2   | 3.364082523 | 0    | 89  | 0.859646421 |
| TCGA-DD-A39W | 21  | 10  | 0.765068532 | 0    | 71  | 0.094734832 |
| TCGA-DD-A39X | 36  | 0   | 0.866549068 | 0.51 | 104 | 0.612417565 |
| TCGA-DD-A39Z | 40  | 8   | 1.012828769 | 0.03 | 50  | 0.277823016 |
| TCGA-DD-A3A2 | 42  | 222 | 1.315489106 | 0    | 47  | 0.057240338 |
| TCGA-DD-A3A3 | 1   | 0   | 0.655656556 | 0    | 118 | 0.582229505 |
| TCGA-DD-A3A4 | 17  | 42  | 0.267091809 | 0.01 | 64  | 0.056447788 |
| TCGA-DD-A3A5 | 23  | 4   | 3.5945011   | 0.1  | 437 | 0.220138922 |
| TCGA-DD-A3A6 | 14  | 8   | NA          | 0.04 | 47  | 0.04678589  |
| TCGA-DD-A3A7 | 40  | 34  | 1.26666082  | 0.06 | 239 | 0.94638928  |
| TCGA-DD-A3A8 | 77  | 19  | 0.99751525  | 0.11 | 88  | 0.224231448 |
| TCGA-DD-A3A9 | 170 | 242 | 0.55456373  | 0.11 | 166 | 0.633520634 |
| TCGA-DD-A4NA | 13  | 53  | 2.681533996 | NA   | 240 | 0.804146036 |
| TCGA-DD-A4NB | 15  | 64  | 0.678027566 | 0.13 | 85  | 0.16607032  |
| TCGA-DD-A4ND | 26  | 13  | 1.510707319 | 0.01 | 84  | 0.398497913 |
| TCGA-DD-A4NF | 79  | 6   | 1.103598369 | 0.08 | 57  | 0.118854169 |
| TCGA-DD-A4NH | 19  | 24  | 1.215642445 | 0.03 | 72  | 0.374766062 |
| TCGA-DD-A4NI | 57  | 27  | 1.084725719 | 0.3  | 59  | 0.655262355 |
| TCGA-DD-A4NK | 36  | 23  | 0.962882463 | 0    | 60  | 0.344123014 |
| TCGA-DD-A4NL | 14  | 17  | 0.754385705 | 0    | 53  | 2.06E-05    |
| TCGA-DD-A4NN | 28  | 140 | 0.891235018 | 0.23 | 108 | 0.445138447 |
| TCGA-DD-A4NO | 25  | 3   | 0.692076134 | 0.17 | 117 | 0.792238222 |
| TCGA-DD-A4NP | 15  | 4   | 0.765682258 | 0    | 55  | 0.038904472 |
| TCGA-DD-A4NQ | 19  | 12  | 2.148968385 | 0.13 | 63  | 0.35427729  |

|              |     |     |             |      |     |             |
|--------------|-----|-----|-------------|------|-----|-------------|
| TCGA-DD-A4NR | 29  | 107 | 3.151227682 | 0    | 71  | 0.187091196 |
| TCGA-DD-A4NS | 32  | 4   | 1.548720581 | 0.14 | 45  | 0.108337192 |
| TCGA-DD-A4NV | 71  | 0   | 2.694032629 | 0.11 | 61  | 0.953563018 |
| TCGA-DD-A73A | 47  | 130 | 0.858565187 | 0    | 149 | 0.090767085 |
| TCGA-DD-A73B | NA  | NA  | 0.519929362 | 0.02 | 123 | 0.946304169 |
| TCGA-DD-A73C | 38  | NA  | 1.064303479 | 0    | 71  | 0.046721974 |
| TCGA-DD-A73D | 44  | 15  | 0.736727628 | 0    | 128 | 0.946951756 |
| TCGA-DD-A73E | 59  | 14  | 0.837142144 | 0    | 80  | 0.385325965 |
| TCGA-DD-A73F | 34  | 0   | 3.208107048 | 0.07 | 543 | 0.180820917 |
| TCGA-DD-A73G | 53  | 2   | 0.478731417 | 0.12 | 640 | 0.852126266 |
| TCGA-DD-AA3A | 15  | 21  | 1.501600592 | 0.01 | 152 | 0.389367013 |
| TCGA-DD-AAC8 | 298 | 24  | 1.917933749 | 0.02 | 120 | 0.463744462 |
| TCGA-DD-AAC9 | 31  | 0   | 0.203421572 | 0.03 | 89  | 0.099997109 |
| TCGA-DD-AACA | 26  | NA  | 1.825668453 | 0.04 | 148 | 0.166047475 |
| TCGA-DD-AACB | 47  | 64  | 4.376988673 | 0.16 | 160 | 0.618129086 |
| TCGA-DD-AACC | 46  | 49  | 0.874129855 | 0.04 | 120 | 0.206777751 |
| TCGA-DD-AACD | 49  | 52  | 1.247627694 | 0.13 | 303 | 0.227483714 |
| TCGA-DD-AACE | 48  | 12  | 1.276033291 | 0.09 | 87  | 0.718387906 |
| TCGA-DD-AACF | 66  | 209 | 0.518413756 | 0.01 | 128 | 0.311144072 |
| TCGA-DD-AACG | 50  | 96  | 3.519895191 | 0.06 | 237 | 0.868524409 |
| TCGA-DD-AACH | 42  | 71  | 5.028528303 | 0.05 | 214 | 0.328589335 |
| TCGA-DD-AACI | 180 | 297 | 1.130884396 | 0.15 | 288 | 0.912972618 |
| TCGA-DD-AACJ | 27  | 19  | 2.370799049 | 0.02 | 146 | 0.914746442 |
| TCGA-DD-AACK | 44  | 1   | 2.26665724  | 0.01 | 106 | 0.042724456 |
| TCGA-DD-AACL | 124 | 13  | 2.844276337 | 0.04 | 170 | 0.233344085 |
| TCGA-DD-AACM | NA  | NA  | NA          | 0.01 | 158 | 0.262960133 |
| TCGA-DD-AACN | 22  | 75  | 0.702085281 | 0    | 133 | 0.540430301 |
| TCGA-DD-AACO | 23  | 9   | 0.153092585 | 0.24 | 156 | 0.623129067 |
| TCGA-DD-AACP | 92  | 15  | 5.470918676 | 0.15 | 119 | 0.76186438  |
| TCGA-DD-AACQ | 98  | 242 | 0.761155987 | 0    | 133 | 0.175150339 |
| TCGA-DD-AACS | 30  | 2   | 0.47151304  | 0.04 | 159 | 0.426018736 |
| TCGA-DD-AACT | 51  | 48  | 1.136716944 | 0.12 | 122 | 0.923036369 |
| TCGA-DD-AACU | 72  | 8   | 1.806103345 | 0.14 | 137 | 0.810807004 |
| TCGA-DD-AACV | 42  | 91  | 4.3516642   | 0.05 | 269 | 0.928686653 |
| TCGA-DD-AACW | 26  | 11  | 1.368117516 | 0    | 96  | 0.653212043 |
| TCGA-DD-AACX | 65  | 18  | 0.703622528 | 0    | 142 | 0.111572383 |
| TCGA-DD-AACY | 31  | 16  | 0.885670464 | 0.03 | 160 | 0.282726672 |
| TCGA-DD-AACZ | 73  | 15  | 3.538895786 | 0.31 | 219 | 0.646860071 |
| TCGA-DD-AAD0 | 57  | 24  | 1.104762718 | 0    | 143 | 0.166355609 |
| TCGA-DD-AAD1 | 59  | 35  | 1.043052565 | 0.15 | 104 | 0.235099248 |
| TCGA-DD-AAD2 | 36  | 2   | 1.30713488  | 0.02 | 111 | 0.157049894 |

|              |     |     |             |      |     |             |
|--------------|-----|-----|-------------|------|-----|-------------|
| TCGA-DD-AAD3 | 35  | 1   | 1.424615009 | 0.05 | 165 | 0.248645527 |
| TCGA-DD-AAD5 | 27  | 60  | 4.907398221 | 0.19 | 227 | 0.527708617 |
| TCGA-DD-AAD6 | 53  | 3   | 0.86262     | 0.08 | 140 | 0.292250766 |
| TCGA-DD-AAD8 | 61  | 0   | 3.668861832 | 0.1  | 132 | 0.909828627 |
| TCGA-DD-AADA | 62  | 4   | 1.155295034 | 0.04 | 133 | 0.245465581 |
| TCGA-DD-AADB | 55  | NA  | 1.427769621 | 0.16 | 149 | 0.775953937 |
| TCGA-DD-AADC | 29  | 8   | 4.269844661 | 0.02 | 318 | 0.454738245 |
| TCGA-DD-AADD | 38  | 9   | 4.183625383 | 0.43 | 148 | 0.544769663 |
| TCGA-DD-AADE | NA  | NA  | NA          | 0    | 151 | 0.072830013 |
| TCGA-DD-AADF | 88  | 127 | 3.220068012 | 0.11 | 665 | 0.386137512 |
| TCGA-DD-AADG | 85  | 67  | 3.378323504 | 0.03 | 154 | 0.179586804 |
| TCGA-DD-AADI | 61  | 113 | 0.907978057 | 0.17 | 116 | 0.267465773 |
| TCGA-DD-AADJ | 31  | 126 | 2.121639635 | 0.03 | 447 | 0.206082974 |
| TCGA-DD-AADK | 34  | 139 | 1.475330127 | 0.04 | 86  | 0.312155772 |
| TCGA-DD-AADL | 59  | 157 | 3.555900115 | 0.34 | 189 | 0.839490306 |
| TCGA-DD-AADM | 74  | 80  | 1.408596591 | 0.07 | 171 | 0.280164941 |
| TCGA-DD-AADN | 56  | 21  | 0.756785702 | 0.23 | 233 | 0.467553713 |
| TCGA-DD-AADO | 88  | 110 | 1.045906724 | 0.01 | 230 | 0.849190666 |
| TCGA-DD-AADP | 45  | 0   | 0.775192565 | 0.01 | 165 | 0.85360047  |
| TCGA-DD-AADQ | 56  | 84  | 1.550291511 | 0.11 | 154 | 0.20735583  |
| TCGA-DD-AADS | 71  | 27  | 0.759753967 | 0    | 102 | 0.087955199 |
| TCGA-DD-AADU | 43  | 11  | 0.823091175 | 0    | 90  | 0.947385412 |
| TCGA-DD-AADV | 60  | 48  | 4.053027519 | 0.26 | 243 | 0.772779883 |
| TCGA-DD-AADW | 27  | 11  | 1.17805685  | 0.22 | 165 | 0.436569007 |
| TCGA-DD-AADY | 21  | 0   | 0.483937233 | 0.02 | 175 | 0.94630988  |
| TCGA-DD-AAE0 | 27  | 28  | 0.906105569 | 0.19 | 143 | 0.497886472 |
| TCGA-DD-AAE1 | 18  | 1   | 1.180215397 | 0.03 | 95  | 0.258263302 |
| TCGA-DD-AAE2 | 47  | 32  | 4.044217532 | 0.04 | 515 | 0.622050666 |
| TCGA-DD-AAE3 | 60  | 117 | 2.758816682 | 0.06 | 203 | 0.693285256 |
| TCGA-DD-AAE4 | 30  | 0   | 2.745472904 | 0.01 | 408 | 0.117051239 |
| TCGA-DD-AAE6 | 31  | 71  | 1.189011101 | 0.04 | 152 | 0.451558343 |
| TCGA-DD-AAE7 | 122 | 166 | 0.819075087 | 0.04 | 84  | 0.047470074 |
| TCGA-DD-AAE8 | NA  | NA  | NA          | 0.22 | 98  | 0.471489113 |
| TCGA-DD-AAE9 | 49  | 8   | 2.721312253 | 0.05 | 134 | 0.947220615 |
| TCGA-DD-AAEA | 41  | 83  | 1.216231847 | 0.09 | 153 | 0.287688062 |
| TCGA-DD-AAEB | 56  | 70  | 1.768861626 | 0.01 | 125 | 0.144637823 |
| TCGA-DD-AAED | 35  | 134 | 0.366707445 | 0.02 | 188 | 0.894990001 |
| TCGA-DD-AAEE | 39  | 21  | 2.183695105 | 0.11 | 172 | 0.403343652 |
| TCGA-DD-AAEG | 61  | 109 | 1.322676324 | 0.18 | 214 | 0.312938935 |
| TCGA-DD-AAEH | 40  | 57  | 0.259326611 | 0.02 | 129 | 0.221412035 |
| TCGA-DD-AAEI | 15  | 28  | 0.771179729 | 0.01 | 192 | 0.152868884 |

|              |     |     |             |      |      |             |
|--------------|-----|-----|-------------|------|------|-------------|
| TCGA-DD-AAEK | 32  | 1   | 1.214055724 | 0.08 | 120  | 0.59751123  |
| TCGA-DD-AAVP | 42  | 9   | 0.53670631  | 0.03 | 146  | 0.237494003 |
| TCGA-DD-AAVQ | 27  | 0   | 0.747606921 | 0.01 | 83   | 0.530730082 |
| TCGA-DD-AAVR | 27  | 6   | 0.418729601 | 0.04 | 215  | 0.155698308 |
| TCGA-DD-AAVS | 15  | 24  | 0.474640633 | 0.04 | 90   | 0.345224467 |
| TCGA-DD-AAVU | 24  | 55  | 1.018386053 | 0.04 | 153  | 0.916926684 |
| TCGA-DD-AAVV | 56  | 36  | 1.030071817 | 0.25 | 163  | 0.722307972 |
| TCGA-DD-AAVW | 18  | 1   | 2.291516681 | 0.04 | 182  | 0.35499112  |
| TCGA-DD-AAVX | 22  | 0   | 0.539434886 | 0.02 | 83   | 0.124224639 |
| TCGA-DD-AAVY | 41  | 166 | 0.475508602 | 0.04 | 147  | 0.301235656 |
| TCGA-DD-AAVZ | 21  | 5   | 0.834397669 | 0.04 | 138  | 0.335366663 |
| TCGA-DD-AAW0 | 42  | 6   | 1.740915826 | 0.04 | 137  | 0.286027287 |
| TCGA-DD-AAW1 | 59  | 7   | 1.045223779 | 0.01 | 36   | 0.196435123 |
| TCGA-DD-AAW2 | 59  | 6   | 0.849569113 | 0.08 | 143  | 0.823366008 |
| TCGA-DD-AAW3 | 35  | 99  | 0.579637819 | 0.01 | 69   | 0.224825927 |
| TCGA-ED-A459 | 126 | 179 | 1.405517021 | 0.34 | 348  | 0.882000088 |
| TCGA-ED-A4XI | 91  | 12  | 0.866217867 | 0.04 | 81   | 0.103810866 |
| TCGA-ED-A5KG | 14  | 0   | 2.027296377 | 0.4  | 53   | 0.020974725 |
| TCGA-ED-A66X | 20  | 0   | 0.889349714 | 0.07 | 83   | 0.526991573 |
| TCGA-ED-A66Y | 39  | 1   | 1.5165608   | 0.15 | 121  | 0.843368879 |
| TCGA-ED-A7PX | 17  | 1   | 1.272248141 | 0.13 | 280  | 0.800077731 |
| TCGA-ED-A7PY | 18  | NA  | 0.754013572 | 0.09 | 78   | 0.365116766 |
| TCGA-ED-A7PZ | 86  | 7   | 5.036493828 | 0.26 | 187  | 0.846310603 |
| TCGA-ED-A7XO | 36  | 36  | 2.050811733 | 0.32 | 203  | 0.530831931 |
| TCGA-ED-A7XP | 36  | 5   | 1.666509758 | 0.13 | 109  | 0.288964002 |
| TCGA-ED-A82E | 13  | 0   | 0.551009623 | 0.06 | 184  | 0.66757037  |
| TCGA-ED-A8O5 | 31  | 0   | 0.753780552 | 0    | 110  | 0.257510208 |
| TCGA-ED-A8O6 | 30  | 87  | 0.967732395 | 0.33 | 129  | 0.589619068 |
| TCGA-ED-A97K | 24  | 28  | 2.351003199 | 0.1  | 182  | 0.827746078 |
| TCGA-EP-A12J | 27  | 94  | 0.863901327 | 0.04 | 123  | 0.198122767 |
| TCGA-EP-A26S | 51  | 65  | 1.538424489 | 0    | 97   | 0.08447616  |
| TCGA-EP-A2KA | 41  | 123 | 1.085873813 | 0.06 | 1020 | 0.68986212  |
| TCGA-EP-A2KB | 33  | 5   | 0.854650992 | 0.35 | 58   | 0.642665892 |
| TCGA-EP-A2KC | 42  | 59  | 1.86987415  | 0.5  | 84   | 0.511203646 |
| TCGA-EP-A3JL | 46  | 26  | 1.990131118 | 0.33 | 47   | 0.656296256 |
| TCGA-EP-A3RK | 39  | 0   | 2.628646258 | 0.04 | 58   | 0.233153193 |
| TCGA-ES-A2HS | 28  | 68  | 0.350067097 | 0.14 | 117  | 0.711757518 |
| TCGA-ES-A2HT | 44  | NA  | 0.716874708 | 0.1  | 81   | 0.14887616  |
| TCGA-FV-A23B | 36  | 7   | 2.616364459 | 0.13 | 130  | 0.201889241 |
| TCGA-FV-A2QQ | 66  | 162 | 3.430954521 | 0.14 | 95   | 0.36967814  |
| TCGA-FV-A2QR | 46  | 22  | 3.085092859 | 0.01 | 159  | 0.26057102  |

|              |    |     |             |      |     |             |
|--------------|----|-----|-------------|------|-----|-------------|
| TCGA-FV-A3I0 | 30 | 0   | NA          | 0.06 | 149 | 0.868953451 |
| TCGA-FV-A3I1 | 11 | 1   | 2.944539602 | 0.25 | 141 | 0.312949874 |
| TCGA-FV-A3R2 | 37 | 67  | 0.356562862 | 0    | 103 | 0.401820246 |
| TCGA-FV-A3R3 | 30 | 5   | 1.039473919 | 0    | 43  | 0.096857797 |
| TCGA-FV-A495 | 67 | 13  | 2.830754316 | 0.07 | 339 | 0.194120596 |
| TCGA-FV-A496 | 65 | 1   | 1.810699312 | 0.26 | 517 | 0.973318299 |
| TCGA-FV-A4ZP | 56 | 119 | 0.734133064 | 0.07 | 217 | 0.543737063 |
| TCGA-FV-A4ZQ | 34 | 0   | 1.097625065 | 0.05 | 120 | 0.947679586 |
| TCGA-G3-A25S | 88 | 102 | 4.190898775 | 0.26 | 228 | 0.935356301 |
| TCGA-G3-A25T | 35 | 14  | 1.137952736 | 0.17 | 63  | 0.530182168 |
| TCGA-G3-A25U | 34 | 2   | 1.061295647 | 0.07 | 157 | 0.366826554 |
| TCGA-G3-A25V | 33 | 47  | 2.937659063 | 0.11 | 45  | 0.027641482 |
| TCGA-G3-A25W | NA | NA  | NA          | 0.01 | 109 | 0.303750295 |
| TCGA-G3-A25Y | 57 | 1   | 0.888238324 | 0.11 | 128 | 0.302606967 |
| TCGA-G3-A25Z | 35 | 113 | 2.343183285 | 0.24 | 149 | 0.317708085 |
| TCGA-G3-A3CH | 19 | 7   | 0.661755434 | 0.07 | 83  | 0.230354032 |
| TCGA-G3-A3CI | 4  | NA  | 0.400832166 | 0    | 61  | 0.016386815 |
| TCGA-G3-A3CK | 69 | 18  | 0.940604006 | 0.03 | 62  | 0.078143499 |
| TCGA-G3-A5SI | 18 | 6   | 0.402644341 | 0.07 | 105 | 0.320955831 |
| TCGA-G3-A5SJ | 56 | 154 | 3.702932773 | 0.01 | 91  | 0.205197545 |
| TCGA-G3-A5SL | 59 | 45  | 1.158982883 | 0.18 | 100 | 0.378621624 |
| TCGA-G3-A5SM | 58 | 7   | 2.385185172 | 0.35 | 58  | 0.496995615 |
| TCGA-G3-A6UC | 58 | 33  | 0.548643581 | 0.08 | 148 | 0.250360781 |
| TCGA-G3-A7M5 | 94 | 297 | 3.425515038 | 0    | 95  | 0.95231933  |
| TCGA-G3-A7M6 | 48 | 12  | 4.770797158 | 0.07 | 124 | 0.277581559 |
| TCGA-G3-A7M7 | 34 | NA  | 0.882019448 | 0.04 | 122 | 0.069826545 |
| TCGA-G3-A7M8 | 10 | 0   | 0.690477419 | 0    | 55  | 3.06E-05    |
| TCGA-G3-A7M9 | 67 | 165 | 7.074107932 | 0.45 | 154 | 0.662035592 |
| TCGA-G3-AAUZ | 31 | 25  | 0.948954688 | 0.1  | 277 | 0.202495387 |
| TCGA-G3-AAV0 | 91 | 254 | 0.916458349 | 0    | 103 | 0.176762485 |
| TCGA-G3-AAV1 | 31 | 87  | 0.707950794 | 0.29 | 127 | 0.817803243 |
| TCGA-G3-AAV2 | 26 | 2   | 1.234963415 | 0    | 78  | 0.213284132 |
| TCGA-G3-AAV3 | 40 | 6   | 1.627544873 | 0    | 69  | 0.210608873 |
| TCGA-G3-AAV4 | 44 | 2   | 0.832349764 | 0.09 | 73  | 0.808168524 |
| TCGA-G3-AAV5 | 47 | 1   | 1.373914371 | 0    | 80  | 0.940868885 |
| TCGA-G3-AAV6 | 30 | 18  | 2.680829812 | 0.22 | 104 | 0.778334353 |
| TCGA-G3-AAV7 | 39 | 16  | 1.3576436   | 0.15 | 107 | 0.932475978 |
| TCGA-GJ-A3OU | 26 | 20  | 0.577153649 | 0.23 | 69  | 0.276433255 |
| TCGA-GJ-A6C0 | 21 | NA  | NA          | 0.03 | 687 | 0.158393799 |
| TCGA-GJ-A9DB | 42 | 1   | 3.769248092 | 0.06 | 140 | 0.258772407 |
| TCGA-HP-A5MZ | 18 | 22  | 0.973319966 | 0.21 | 43  | 0.155189954 |

|              |     |     |             |      |     |             |
|--------------|-----|-----|-------------|------|-----|-------------|
| TCGA-HP-A5N0 | 86  | 159 | 0.988282332 | 0.01 | 89  | 0.201970664 |
| TCGA-K7-A5RG | 62  | 3   | 5.513777398 | 0.16 | 50  | 0.226656785 |
| TCGA-K7-A6G5 | 32  | 2   | 0.997027504 | 0.04 | 92  | 0.148176195 |
| TCGA-K7-AAU7 | 28  | 6   | 3.723482173 | 0.01 | 114 | 0.130997344 |
| TCGA-KR-A7K0 | 41  | 130 | 1.331042633 | 0    | 54  | 0.040319225 |
| TCGA-KR-A7K2 | 16  | 54  | NA          | 0.12 | 66  | 0.854130603 |
| TCGA-KR-A7K7 | 35  | 13  | 2.319317143 | 0.15 | 69  | 0.92668846  |
| TCGA-KR-A7K8 | 15  | 11  | 3.641997071 | 0.28 | 493 | 0.253729351 |
| TCGA-LG-A6GG | 58  | 0   | 3.744184358 | 0.05 | 209 | 0.931309487 |
| TCGA-LG-A9QC | NA  | NA  | 0.496644865 | 0    | 108 | 0.27444726  |
| TCGA-LG-A9QD | 29  | 96  | 0.735483742 | 0.07 | 80  | 0.099519949 |
| TCGA-MI-A75C | 32  | 85  | 1.010798468 | 0.03 | 82  | 0.138489028 |
| TCGA-MI-A75E | 60  | 128 | 0.878981158 | 0.02 | 91  | 0.228896616 |
| TCGA-MI-A75G | 121 | 176 | 2.207605588 | 0.48 | 140 | 0.743827618 |
| TCGA-MI-A75H | 74  | 87  | 1.070384867 | 0    | 63  | 0.15879958  |
| TCGA-MI-A75I | 69  | 14  | 3.99190686  | 0.14 | 99  | 0.37067283  |
| TCGA-MR-A520 | 12  | NA  | 0.826079258 | 0    | 51  | 9.55E-06    |
| TCGA-MR-A8JO | 15  | 4   | 0.563079375 | 0.51 | 69  | 0.205883122 |
| TCGA-NI-A4U2 | 59  | 61  | 1.443601926 | 0.02 | 167 | 0.126869285 |
| TCGA-NI-A8LF | 37  | 5   | 1.467012563 | 0.04 | 426 | 0.606479431 |
| TCGA-O8-A75V | 33  | 15  | 1.129572685 | 0.01 | 88  | 0.351968195 |
| TCGA-PD-A5DF | 18  | 12  | 2.839622832 | 0.07 | 390 | 0.241804371 |
| TCGA-QA-A7B7 | 39  | 5   | 3.147028924 | 0    | 231 | 0.907176757 |
| TCGA-RC-A6M3 | 31  | 3   | NA          | 0.2  | 251 | 0.63121644  |
| TCGA-RC-A6M4 | 65  | 14  | 0.631591413 | 0.04 | 156 | 0.945852531 |
| TCGA-RC-A6M5 | 14  | 45  | 0.221115222 | 0.13 | 65  | 0.097886502 |
| TCGA-RC-A6M6 | 77  | 65  | 4.986838674 | 0.11 | 346 | 0.329539709 |
| TCGA-RC-A7S9 | 32  | 5   | 0.41730917  | 0.02 | 116 | 0.164602659 |
| TCGA-RC-A7SB | 34  | 8   | 5.024041415 | 0.03 | 142 | 0.941311587 |
| TCGA-RC-A7SF | 30  | 60  | 1.195284132 | 0.12 | 105 | 0.262884638 |
| TCGA-RC-A7SH | 27  | 4   | 0.816046677 | 0.22 | 132 | 0.761882041 |
| TCGA-RC-A7SK | 75  | 6   | 3.404704543 | 0.15 | 179 | 0.944359023 |
| TCGA-RG-A7D4 | 58  | 35  | 3.1634587   | 0.54 | 100 | 0.697743016 |
| TCGA-UB-A7MA | 31  | 14  | NA          | 0.03 | 235 | 0.504427017 |
| TCGA-UB-A7MB | 683 | 233 | 1.082875488 | 0.17 | 239 | 0.663267486 |
| TCGA-UB-A7MC | 18  | 47  | 1.263471974 | 0.04 | 133 | 0.456182163 |
| TCGA-UB-A7MD | 55  | 45  | 4.0082537   | 0.04 | 73  | 0.221256595 |
| TCGA-UB-A7ME | 40  | 10  | 1.38415543  | 0.34 | 143 | 0.659514773 |
| TCGA-UB-A7MF | NA  | NA  | 0.428388582 | 0.09 | 109 | 0.795925356 |
| TCGA-UB-AA0U | 32  | 3   | 1.065470796 | 0.12 | 91  | 0.515385969 |
| TCGA-UB-AA0V | 18  | NA  | 0.485328553 | 0    | 41  | 4.17E-05    |



|                     |     |     |             |      |     |             |
|---------------------|-----|-----|-------------|------|-----|-------------|
| <b>TCGA-WJ-A86L</b> | 55  | 171 | 5.652270248 | 0.02 | 429 | 0.160200074 |
| <b>TCGA-WQ-A9G7</b> | 161 | 395 | 1.378439541 | 0.14 | 124 | 0.621239825 |
| <b>TCGA-WQ-AB4B</b> | 35  | 39  | 0.64667538  | 0.15 | 74  | 0.669896868 |
| <b>TCGA-WX-AA44</b> | 37  | 152 | 0.851083613 | 0.47 | 132 | 0.365176964 |
| <b>TCGA-WX-AA46</b> | 25  | 32  | 0.748254583 | 0.04 | 75  | 0.054333669 |
| <b>TCGA-WX-AA47</b> | 20  | 31  | 0.559568001 | 0.06 | 101 | 0.230020096 |
| <b>TCGA-XR-A8TD</b> | 28  | 3   | 3.612429263 | 0.02 | 387 | 0.239283252 |
| <b>TCGA-XR-A8TE</b> | 7   | 3   | 0.667381396 | 0    | 88  | 0.298920884 |
| <b>TCGA-XR-A8TF</b> | 61  | 15  | 2.359388145 | 0.08 | 167 | 0.516488993 |
| <b>TCGA-XR-A8TG</b> | 28  | 48  | 2.014879901 | 0.11 | 794 | 0.232144823 |
| <b>TCGA-YA-A8S7</b> | 33  | 7   | 1.837259364 | 0.16 | 99  | 0.498175048 |
| <b>TCGA-ZP-A9CV</b> | 38  | 8   | 1.16989053  | 0.02 | 62  | 0.153011252 |
| <b>TCGA-ZP-A9CY</b> | 41  | 2   | 1.962678404 | 0.01 | 75  | 0.030374178 |
| <b>TCGA-ZP-A9CZ</b> | 27  | 7   | 0.36140762  | 0.12 | 91  | 0.25159121  |
| <b>TCGA-ZP-A9D0</b> | 26  | 54  | 0.51879669  | 0.26 | 128 | 0.17480344  |
| <b>TCGA-ZP-A9D1</b> | 75  | NA  | 1.849006617 | 0.25 | 56  | 0.551938644 |
| <b>TCGA-ZP-A9D2</b> | 17  | 3   | 1.730759459 | 0.04 | 144 | 0.587142158 |
| <b>TCGA-ZP-A9D4</b> | 39  | 124 | 1.113792781 | 0.03 | 201 | 0.141389666 |
| <b>TCGA-ZS-A9CD</b> | NA  | NA  | 0.844210708 | 0.1  | 77  | 0.159314668 |
| <b>TCGA-ZS-A9CE</b> | 21  | 19  | 2.041709942 | 0    | 118 | 0.773321833 |
| <b>TCGA-ZS-A9CF</b> | 44  | NA  | 2.07661762  | 0.25 | 863 | 0.85047738  |
| <b>TCGA-ZS-A9CG</b> | 28  | 49  | 1.075059622 | 0.08 | 57  | 0.235737127 |

---

| LOH n seg | LOH frac altered | Homologous.Recombination.Defects | Aneuploidy.Score | TCR.Richness | TCR.Shannon |
|-----------|------------------|----------------------------------|------------------|--------------|-------------|
| 18        | 0.0353           | 14                               | 4                | 31           | 3.315039415 |
| 72        | 0.242            | 9                                | 9                | 5            | 1.609437912 |
| 15        | 0.00833          | 2                                | 1                | 27           | 3.23823154  |
| 13        | 0.0427           | 17                               | 10               | 4            | 1.386294361 |
| 25        | 0.0751           | 19                               | 2                | 9            | 2.197224577 |
| 29        | 0.0216           | 12                               | 5                | 18           | 2.815204927 |
| 29        | 0.0625           | 18                               | 3                | 43           | 3.721032164 |
| 77        | 0.186            | 24                               | 23               | 34           | 3.436238682 |
| 38        | 0.071            | 22                               | 13               | 0            | NA          |
| 83        | 0.104            | 16                               | 7                | 18           | 2.508834101 |
| 18        | 0.0338           | 9                                | 5                | 3            | 1.039720771 |
| 55        | 0.141            | 34                               | 22               | 4            | 1.33217904  |
| 49        | 0.0718           | 22                               | 18               | 8            | 2.043191871 |
| 49        | 0.116            | 19                               | 4                | 3            | 1.098612289 |
| 52        | 0.173            | 25                               | 7                | 11           | 2.397895273 |
| 69        | 0.171            | 18                               | 6                | 14           | 2.63905733  |
| 51        | 0.112            | 10                               | 5                | 14           | 2.615630577 |
| 119       | 0.354            | 40                               | 12               | 24           | 2.947248859 |
| 45        | 0.0498           | 11                               | 3                | 2            | 0.693147181 |
| 75        | 0.138            | 21                               | 5                | 3            | 1.098612289 |
| 23        | 0.041            | 6                                | 5                | 17           | 2.813355405 |
| 11        | 0.0159           | 7                                | 18               | 4            | 1.386294361 |
| 53        | 0.107            | 16                               | 1                | 1            | 0           |
| 9         | 0.0258           | 13                               | 17               | 3            | 1.098612289 |
| 37        | 0.118            | 12                               | 6                | 9            | 2.197224577 |
| 88        | 0.345            | 28                               | 12               | 21           | 3.01494688  |
| 32        | 0.0602           | 7                                | 10               | 4            | 1.33217904  |
| 12        | 0.0524           | 1                                | 4                | 10           | 2.271868513 |
| 33        | 0.0728           | 12                               | 4                | 8            | 2.079441542 |
| 162       | 0.0678           | 12                               | 1                | 62           | 4.097187614 |
| 9         | 0.126            | 15                               | 18               | NA           | NA          |
| 68        | 0.229            | 26                               | 20               | 2            | 0.636514168 |
| 44        | 0.147            | 33                               | 3                | 4            | 1.351783994 |
| 15        | 0.11             | 13                               | 8                | 1            | 0           |
| 11        | 0.13             | 24                               | 4                | 6            | 1.732867951 |
| 51        | 0.113            | 29                               | 2                | 1            | 0           |
| 63        | 0.0661           | 19                               | 2                | 0            | NA          |
| 93        | 0.0841           | 20                               | 5                | 21           | 2.867687639 |
| 16        | 0.0704           | 34                               | 21               | 6            | 1.791759469 |

|     |          |    |    |    |             |
|-----|----------|----|----|----|-------------|
| 47  | 0.257    | 34 | 7  | 5  | 1.609437912 |
| 104 | 0.228    | 30 | 13 | 0  | NA          |
| 55  | 0.215    | 23 | 15 | 2  | 0.693147181 |
| 96  | 0.0945   | 19 | 2  | 33 | 3.476131241 |
| 18  | 0.0457   | 13 | 5  | 4  | 1.386294361 |
| 17  | 0.17     | 18 | 22 | 16 | 2.725550396 |
| 41  | 0.083    | 25 | 17 | 2  | 0.693147181 |
| 11  | 0.021    | 3  | 29 | 27 | 2.913089005 |
| 42  | 0.223    | 26 | 9  | 26 | 3.24449263  |
| 29  | 0.187    | 17 | 5  | 12 | 2.45831133  |
| 9   | 0.0969   | 14 | 3  | 13 | 2.51265853  |
| 72  | 0.182    | 34 | 8  | 4  | 1.386294361 |
| 33  | 0.371    | 26 | 19 | 20 | 2.995732274 |
| 17  | 0.175    | 26 | 11 | 72 | 4.201724105 |
| 49  | 0.278    | 37 | 21 | 52 | 3.268608548 |
| 46  | 0.275    | 35 | 6  | 0  | NA          |
| 29  | 0.249    | 27 | 18 | 5  | 1.609437912 |
| 12  | 0.0854   | 25 | 6  | 1  | 0           |
| 33  | 0.103    | 19 | 15 | 0  | NA          |
| 58  | 0.228    | 23 | 16 | 4  | 1.386294361 |
| 45  | 0.169    | 34 | 20 | 3  | 1.098612289 |
| 69  | 0.1      | 28 | 17 | 28 | 3.299829686 |
| 41  | 0.0797   | 23 | 11 | 1  | 0           |
| 91  | 0.317    | 63 | 17 | 0  | NA          |
| 40  | 0.042    | 11 | 7  | 0  | NA          |
| 21  | 0.027    | 25 | 23 | 2  | 0.693147181 |
| 173 | 0.357    | 31 | 8  | 43 | 3.625809829 |
| 18  | 0.0357   | 14 | 22 | 1  | 0           |
| 42  | 0.101    | 19 | 20 | 1  | 0           |
| 48  | 0.122    | 13 | 7  | 4  | 1.33217904  |
| 78  | 0.307    | 34 | 16 | 2  | 0.693147181 |
| 128 | 0.245    | 39 | 24 | 2  | 0.636514168 |
| 67  | 0.251    | 23 | 8  | 5  | 1.609437912 |
| 75  | 0.218    | 31 | 16 | 6  | 1.791759469 |
| 4   | 0.000186 | 0  | 0  | 22 | 3.031590576 |
| 64  | 0.337    | 21 | 21 | 9  | 2.163955657 |
| 36  | 0.201    | 31 | 19 | 14 | 2.615630577 |
| 14  | 0.232    | 11 | 7  | 24 | 3.134162459 |
| 40  | 0.117    | 26 | 7  | 4  | 1.386294361 |
| 33  | 0.208    | 16 | 8  | 5  | 1.560710409 |
| 14  | 0.151    | 19 | 16 | 9  | 2.163955657 |

|     |          |    |    |     |             |
|-----|----------|----|----|-----|-------------|
| 8   | 0.0738   | 17 | 5  | 4   | 1.33217904  |
| 32  | 0.036    | 46 | 13 | 0   | NA          |
| 13  | 0.188    | 7  | 9  | 4   | 1.386294361 |
| 119 | 0.178    | 40 | 5  | 4   | 1.386294361 |
| 32  | 0.016    | 5  | 6  | 2   | 0.693147181 |
| 2   | 0.0156   | 4  | 27 | NA  | NA          |
| 4   | 0.00769  | 3  | 5  | 15  | 2.708050201 |
| 42  | 0.0635   | 22 | 3  | 5   | 1.609437912 |
| 17  | 0.0406   | 11 | 8  | 103 | 4.558934303 |
| 19  | 3.04E-05 | 0  | 0  | 7   | 1.69878299  |
| 6   | 0.0537   | 7  | 6  | 2   | 0.693147181 |
| 17  | 0.192    | 24 | 24 | 22  | 3.052520502 |
| 8   | 0.153    | 9  | 6  | 15  | 2.685945325 |
| 39  | 0.146    | 18 | 11 | 14  | 2.63905733  |
| 16  | 0.0907   | 16 | 11 | 4   | 1.386294361 |
| 44  | 0.12     | 15 | 5  | 6   | 1.791759469 |
| 28  | 0.226    | 33 | 8  | 1   | 0           |
| 16  | 0.0361   | 6  | 11 | 3   | 1.098612289 |
| 6   | 0.00715  | 7  | 1  | 4   | 1.386294361 |
| 33  | 0.112    | 16 | 1  | 2   | 0.693147181 |
| 15  | 0.103    | 11 | 9  | 2   | 0.693147181 |
| 5   | 0.00344  | 1  | 2  | 0   | NA          |
| 7   | 0.0308   | 8  | 8  | 0   | NA          |
| 9   | 0.0691   | 8  | 2  | 0   | NA          |
| 48  | 0.0895   | 17 | 4  | 2   | 0.693147181 |
| 3   | 0.0116   | 0  | 0  | NA  | NA          |
| 46  | 0.136    | 32 | 26 | 0   | NA          |
| 15  | 0.0865   | 14 | 5  | 1   | 0           |
| 64  | 0.154    | 20 | 19 | 4   | 1.351783994 |
| 93  | 0.213    | 24 | 11 | 4   | 1.329661349 |
| 12  | 0.00218  | 0  | 0  | 13  | 2.540036304 |
| 36  | 0.141    | 14 | 13 | 19  | 2.902002313 |
| 5   | 0.00528  | 4  | 2  | 0   | NA          |
| 52  | 0.264    | 23 | 9  | 3   | 1.098612289 |
| 13  | 0.0124   | 8  | 4  | 17  | 2.770973881 |
| 27  | 0.0557   | 8  | 9  | 0   | NA          |
| 8   | 0.00127  | 0  | 0  | 5   | 1.560710409 |
| 60  | 0.221    | 34 | 8  | 0   | NA          |
| 35  | 0.0568   | 11 | 16 | 3   | 1.098612289 |
| 2   | 6.66E-05 | 0  | 2  | 2   | 0.636514168 |
| 64  | 0.248    | 14 | 8  | 2   | 0.636514168 |

|     |        |    |    |    |             |
|-----|--------|----|----|----|-------------|
| 28  | 0.0392 | 14 | 7  | 32 | 3.201249638 |
| 19  | 0.0367 | 8  | 3  | 27 | 3.183922422 |
| 37  | 0.144  | 8  | 15 | 9  | 2.197224577 |
| 37  | 0.0328 | 12 | 1  | 11 | 2.397895273 |
| 93  | 0.333  | 38 | 5  | 1  | 0           |
| 15  | 0.0157 | 2  | 2  | 2  | 0.636514168 |
| 22  | 0.0138 | 10 | 9  | 0  | NA          |
| 26  | 0.0796 | 17 | 13 | 0  | NA          |
| 120 | 0.0968 | 20 | 1  | 27 | 3.23823154  |
| 120 | 0.0912 | 29 | 16 | 0  | NA          |
| 76  | 0.211  | 17 | 8  | 2  | 0.693147181 |
| 26  | 0.0466 | 11 | 14 | 1  | 0           |
| 22  | 0.0495 | 9  | 2  | 6  | 1.747868097 |
| 26  | 0.0688 | 19 | 4  | 3  | 1.098612289 |
| 52  | 0.173  | 19 | 16 | 10 | 2.166084939 |
| 53  | 0.128  | 28 | 5  | 54 | 3.657358179 |
| 90  | 0.069  | 13 | 7  | 2  | 0.636514168 |
| 19  | 0.024  | 6  | 19 | 2  | 0.693147181 |
| 53  | 0.131  | 14 | 10 | 1  | 0           |
| 72  | 0.126  | 26 | 14 | 2  | 0.693147181 |
| 98  | 0.239  | 52 | 6  | 4  | 1.33217904  |
| 29  | 0.0624 | 25 | 20 | 6  | 1.676987774 |
| 31  | 0.0408 | 8  | 9  | 0  | NA          |
| 14  | 0.0161 | 6  | 1  | 12 | 2.403640411 |
| 65  | 0.165  | 14 | 4  | 7  | 1.831020481 |
| 70  | 0.169  | 24 | 6  | NA | NA          |
| 77  | 0.203  | 20 | 12 | 9  | 2.197224577 |
| 43  | 0.0985 | 17 | 10 | 1  | 0           |
| 34  | 0.166  | 10 | 18 | 10 | 2.271868513 |
| 34  | 0.0954 | 26 | 4  | 0  | NA          |
| 69  | 0.171  | 33 | 5  | 0  | NA          |
| 13  | 0.0131 | 8  | 12 | 6  | 1.791759469 |
| 96  | 0.236  | 21 | 23 | 11 | 2.338371705 |
| 96  | 0.203  | 25 | 8  | 1  | 0           |
| 52  | 0.148  | 15 | 5  | 5  | 1.609437912 |
| 27  | 0.0589 | 12 | 5  | 2  | 0.693147181 |
| 27  | 0.0954 | 22 | 5  | 2  | 0.693147181 |
| 109 | 0.196  | 29 | 20 | 32 | 3.429486232 |
| 47  | 0.0838 | 23 | 4  | 5  | 1.609437912 |
| 34  | 0.0812 | 20 | 7  | 40 | 3.626656184 |
| 26  | 0.0206 | 8  | 5  | 12 | 2.48490665  |

|     |        |    |    |    |             |
|-----|--------|----|----|----|-------------|
| 67  | 0.173  | 21 | 8  | 8  | 2.043191871 |
| 63  | 0.0979 | 34 | 15 | 0  | NA          |
| 37  | 0.128  | 15 | 8  | 2  | 0.693147181 |
| 48  | 0.135  | 14 | 15 | 0  | NA          |
| 24  | 0.0504 | 18 | 8  | 12 | 2.48490665  |
| 90  | 0.199  | 17 | 7  | 39 | 3.626656184 |
| 114 | 0.299  | 39 | 8  | 3  | 1.098612289 |
| 50  | 0.21   | 16 | 14 | 4  | 1.386294361 |
| 31  | 0.0219 | 5  | 3  | NA | NA          |
| 98  | 0.0954 | 39 | 10 | 4  | 1.386294361 |
| 39  | 0.0446 | 13 | 6  | 0  | NA          |
| 39  | 0.109  | 13 | 5  | 30 | 3.36326707  |
| 193 | 0.117  | 14 | 5  | 3  | 1.039720771 |
| 59  | 0.258  | 17 | 7  | 13 | 2.540036304 |
| 52  | 0.186  | 19 | 13 | 4  | 1.386294361 |
| 49  | 0.113  | 31 | 5  | 7  | 1.906154747 |
| 69  | 0.148  | 24 | 16 | 12 | 2.441015278 |
| 75  | 0.159  | 38 | 18 | 8  | 1.979204517 |
| 71  | 0.206  | 23 | 6  | 6  | 1.791759469 |
| 65  | 0.132  | 9  | 6  | 4  | 1.33217904  |
| 30  | 0.014  | 0  | 4  | 5  | 1.427061043 |
| 15  | 0.0108 | 13 | 23 | 0  | NA          |
| 117 | 0.268  | 23 | 6  | 3  | 1.098612289 |
| 95  | 0.179  | 37 | 5  | 6  | 1.791759469 |
| 106 | 0.318  | 30 | 8  | 1  | 0           |
| 62  | 0.149  | 21 | 16 | 2  | 0.693147181 |
| 30  | 0.138  | 16 | 5  | 5  | 1.609437912 |
| 132 | 0.175  | 25 | 5  | 19 | 2.944438979 |
| 57  | 0.195  | 21 | 24 | 1  | 0           |
| 58  | 0.077  | 15 | 2  | 10 | 2.13338193  |
| 48  | 0.146  | 41 | 9  | 0  | NA          |
| 17  | 0.0206 | 8  | 2  | 5  | 1.609437912 |
| 68  | 0.274  | 27 | 11 | NA | NA          |
| 56  | 0.165  | 9  | 14 | 0  | NA          |
| 34  | 0.0937 | 19 | 8  | 4  | 1.386294361 |
| 30  | 0.0402 | 7  | 5  | 1  | 0           |
| 65  | 0.216  | 20 | 7  | 0  | NA          |
| 69  | 0.214  | 32 | 6  | 2  | 0.693147181 |
| 82  | 0.121  | 18 | 6  | 0  | NA          |
| 45  | 0.0826 | 14 | 7  | 36 | 3.539627567 |
| 57  | 0.0615 | 16 | 4  | 8  | 2.079441542 |

|     |          |    |    |     |             |
|-----|----------|----|----|-----|-------------|
| 57  | 0.198    | 29 | 14 | 28  | 3.286462961 |
| 48  | 0.124    | 28 | 5  | 1   | 0           |
| 25  | 0.118    | 18 | 13 | 79  | 4.356001161 |
| 34  | 0.0336   | 13 | 4  | 10  | 2.302585093 |
| 54  | 0.19     | 20 | 7  | 7   | 1.945910149 |
| 70  | 0.192    | 16 | 29 | 0   | NA          |
| 51  | 0.238    | 29 | 17 | 11  | 2.397895273 |
| 85  | 0.223    | 29 | 8  | 15  | 2.708050201 |
| 21  | 0.0346   | 8  | 2  | 5   | 1.609437912 |
| 41  | 0.0601   | 10 | 8  | 1   | 0           |
| 65  | 0.161    | 17 | 6  | 2   | 0.693147181 |
| 71  | 0.207    | 23 | 8  | 18  | 2.890371758 |
| 19  | 0.00638  | 5  | 3  | 2   | 0.693147181 |
| 21  | 0.0535   | 8  | 9  | 0   | NA          |
| 25  | 0.103    | 13 | 7  | 1   | 0           |
| 196 | 0.282    | 42 | 14 | 2   | 0.693147181 |
| 32  | 0.0308   | 12 | 1  | 10  | 2.205598359 |
| 14  | 0.00224  | 0  | 0  | 163 | 5.057036621 |
| 7   | 0.000874 | 12 | 20 | 8   | 2.079441542 |
| 31  | 0.0797   | 15 | 14 | 2   | 0.693147181 |
| 121 | 0.277    | 36 | 4  | 3   | 1.098612289 |
| 40  | 0.133    | 18 | 8  | 3   | 1.098612289 |
| 67  | 0.202    | 25 | 17 | 0   | NA          |
| 121 | 0.229    | 25 | 5  | 6   | 1.791759469 |
| 74  | 0.219    | 27 | 6  | 6   | 1.747868097 |
| 65  | 0.203    | 29 | 20 | 3   | 1.098612289 |
| 47  | 0.168    | 14 | 8  | 5   | 1.560710409 |
| 63  | 0.203    | 23 | 24 | 7   | 1.906154747 |
| 99  | 0.372    | 46 | 28 | 10  | 2.271868513 |
| 8   | 0.0674   | 9  | 4  | 1   | 0           |
| 3   | 0.0171   | 5  | 3  | 2   | 0.693147181 |
| 77  | 0.0652   | 14 | 5  | 31  | 3.321477718 |
| 12  | 0.236    | 5  | 7  | 5   | 1.609437912 |
| 8   | 0.0232   | 5  | 9  | 4   | 1.386294361 |
| 3   | 0.0758   | 6  | 26 | 17  | 2.780466369 |
| 11  | 0.177    | 17 | 5  | 23  | 2.956488663 |
| 7   | 0.121    | 9  | 21 | 0   | NA          |
| 2   | 0.0154   | 3  | 33 | 1   | 0           |
| 15  | 0.13     | 19 | 5  | 13  | 2.293118601 |
| 14  | 0.0745   | 12 | 4  | 8   | 2.043191871 |
| 43  | 0.133    | 27 | 5  | 0   | NA          |

|     |          |    |    |    |             |
|-----|----------|----|----|----|-------------|
| 38  | 0.194    | 30 | 17 | NA | NA          |
| 43  | 0.217    | 15 | 9  | 14 | 2.615630577 |
| 17  | 0.167    | 12 | 13 | 6  | 1.747868097 |
| 3   | 0.0246   | 7  | 1  | 9  | 2.197224577 |
| 90  | 0.0778   | 20 | 5  | 6  | 1.672625446 |
| 96  | 0.104    | 43 | 8  | 0  | NA          |
| 53  | 0.0842   | 18 | 13 | 0  | NA          |
| 55  | 0.109    | 15 | 11 | 44 | 3.591699931 |
| 26  | 0.272    | 26 | 23 | 2  | 0.693147181 |
| 6   | 0.113    | 13 | 15 | 0  | NA          |
| 22  | 0.154    | 19 | 6  | 1  | 0           |
| 19  | 0.00178  | 1  | 0  | 11 | 2.397895273 |
| 12  | 0.0396   | 12 | 9  | NA | NA          |
| 19  | 0.189    | 32 | 3  | 13 | 2.523210953 |
| 20  | 0.0887   | 12 | 7  | 3  | 1.098612289 |
| 15  | 0.106    | 12 | 3  | 10 | 2.25385759  |
| 5   | 0.0173   | 2  | 0  | 8  | 2.079441542 |
| 4   | 0.002    | 4  | 1  | 9  | 1.745608564 |
| 43  | 0.144    | 32 | 4  | 0  | NA          |
| 41  | 0.102    | 12 | 7  | 14 | 2.55779386  |
| 29  | 0.0609   | 7  | 6  | 3  | 1.098612289 |
| 16  | 0.0905   | 9  | 19 | 13 | 2.406159575 |
| 50  | 0.0593   | 9  | 6  | 0  | NA          |
| 47  | 0.182    | 6  | 16 | 0  | NA          |
| 55  | 0.131    | 21 | 8  | 10 | 2.302585093 |
| 17  | 0.0157   | 3  | 2  | 1  | 0           |
| 2   | 6.16E-05 | 0  | 0  | 0  | NA          |
| 57  | 0.178    | 31 | 15 | 2  | 0.693147181 |
| 47  | 0.0731   | 13 | 7  | 2  | 0.693147181 |
| 16  | 0.0404   | 16 | 4  | 6  | 1.747868097 |
| 32  | 0.101    | 27 | 15 | 5  | 1.560710409 |
| 21  | 0.0594   | 13 | 4  | 0  | NA          |
| 23  | 0.0712   | 8  | 4  | 26 | 3.144314011 |
| 25  | 0.0795   | 12 | 9  | 2  | 0.693147181 |
| 19  | 0.0231   | 7  | 11 | 4  | 1.386294361 |
| 37  | 0.15     | 29 | 20 | 2  | 0.693147181 |
| 78  | 0.369    | 23 | 9  | 13 | 2.540036304 |
| 48  | 0.13     | 15 | 6  | 68 | 4.083687893 |
| 149 | 0.093    | 23 | 3  | NA | NA          |
| 44  | 0.0788   | 9  | 6  | 0  | NA          |
| 9   | 0.000867 | 2  | 5  | 24 | 3.122424598 |



|     |          |    |    |    |             |
|-----|----------|----|----|----|-------------|
| 38  | 0.11     | 19 | 4  | 1  | 0           |
| 3   | 0.000858 | 6  | 3  | 55 | 3.811174982 |
| 28  | 0.0275   | 5  | 3  | 5  | 1.475076311 |
| 37  | 0.0582   | 11 | 4  | 9  | 2.145841753 |
| 15  | 0.00711  | 4  | 2  | 0  | NA          |
| 26  | 0.0328   | 9  | 18 | NA | NA          |
| 27  | 0.0221   | 4  | 17 | 10 | 2.25385759  |
| 5   | 9.57E-05 | 24 | 4  | 15 | 2.625048159 |
| 78  | 0.113    | 16 | 15 | 1  | 0           |
| 47  | 0.189    | 13 | 7  | 3  | 1.098612289 |
| 25  | 0.0286   | 7  | 3  | 7  | 1.945910149 |
| 25  | 0.0636   | 10 | 5  | 9  | 2.163955657 |
| 9   | 0.00061  | 6  | 5  | 12 | 2.48490665  |
| 44  | 0.0948   | 10 | 12 | 1  | 0           |
| 23  | 0.0599   | 9  | 5  | 4  | 1.33217904  |
| 58  | 0.194    | 13 | 10 | 5  | 1.560710409 |
| 5   | 0.00115  | 0  | 0  | 3  | 1.098612289 |
| 28  | 0.127    | 11 | 4  | 17 | 2.787788119 |
| 47  | 0.0726   | 17 | 4  | 0  | NA          |
| 115 | 0.129    | 51 | 18 | 3  | 1.098612289 |
| 29  | 0.0663   | 18 | 8  | 16 | 2.772588722 |
| 74  | 0.107    | 28 | 3  | 5  | 1.609437912 |
| 90  | 0.221    | 23 | 7  | 12 | 2.45831133  |
| 93  | 0.172    | 24 | 20 | 4  | 1.386294361 |
| 32  | 0.108    | 19 | 15 | 1  | 0           |
| 5   | 0.0281   | 7  | 12 | 5  | 1.560710409 |
| 118 | 0.2      | 42 | 4  | 11 | 2.397895273 |
| 42  | 0.0523   | 19 | 5  | 3  | 1.039720771 |
| 65  | 0.181    | 19 | 5  | 0  | NA          |
| 49  | 0.139    | 13 | 8  | 5  | 1.609437912 |
| 72  | 0.224    | 26 | 6  | 2  | 0.693147181 |
| 19  | 0.0902   | 20 | 17 | 1  | 0           |
| 29  | 0.066    | 29 | 27 | 16 | 2.725550396 |
| 61  | 0.121    | 42 | 13 | NA | NA          |
| 110 | 0.174    | 29 | 4  | 1  | 0           |
| 51  | 0.156    | 20 | 14 | 2  | 0.693147181 |
| 25  | 0.0571   | 9  | 6  | 7  | 1.906154747 |
| 61  | 0.131    | 36 | 22 | 21 | 2.982965029 |
| 36  | 0.099    | 29 | 11 | 20 | 2.882937427 |
| 48  | 0.146    | 41 | 16 | 16 | 2.772588722 |
| 6   | 0.00131  | 0  | 0  | 3  | 1.098612289 |

|     |         |    |    |    |             |
|-----|---------|----|----|----|-------------|
| 64  | 0.087   | 23 | 4  | 3  | 1.098612289 |
| 91  | 0.291   | 34 | 18 | 0  | NA          |
| 15  | 0.0334  | 9  | 20 | 1  | 0           |
| 47  | 0.0581  | 15 | 5  | 2  | 0.693147181 |
| 17  | 0.0281  | 5  | 2  | 2  | 0.693147181 |
| 33  | 0.059   | 6  | 6  | 0  | NA          |
| 107 | 0.127   | 29 | 7  | 27 | 3.282693997 |
| 20  | 0.088   | 4  | 6  | 4  | 1.386294361 |
| 72  | 0.159   | 14 | 15 | 0  | NA          |
| 122 | 0.0842  | 20 | 5  | 3  | 1.098612289 |
| 30  | 0.177   | 19 | 19 | 10 | 2.302585093 |
| 17  | 0.0335  | 5  | 3  | 7  | 1.906154747 |
| 12  | 0.00996 | 6  | 0  | 5  | 1.609437912 |
| 45  | 0.142   | 30 | 4  | 13 | 2.479955521 |
| 41  | 0.141   | 23 | 4  | 0  | NA          |
| 37  | 0.179   | 14 | 15 | 18 | 2.871476118 |
| 122 | 0.354   | 12 | 9  | 2  | 0.693147181 |
| 43  | 0.0429  | 8  | 5  | 0  | NA          |
| 8   | 0.015   | 6  | 3  | 5  | 1.609437912 |
| 31  | 0.0741  | 17 | 13 | 0  | NA          |
| 164 | 0.17    | 38 | 5  | 3  | 1.098612289 |
| 23  | 0.116   | 6  | 5  | 3  | 1.098612289 |

---

**Table S7. Top 30 mutated genes in TCHA-LIHC patients.**

| <b>TCGA-BC-A5W4</b> | <b>TCGA-RG-A7D4</b> | <b>TCGA-DD-A1EE</b> | <b>TCGA-DD-AACB</b> | <b>TCGA-BW-A5NQ</b> | <b>TCGA-CC-A5UD</b> | <b>TCGA-G3-A5SJ</b> |
|---------------------|---------------------|---------------------|---------------------|---------------------|---------------------|---------------------|
| <b>CTNNB1</b>       | Missense_Mutation   | Missense_Mutation   | Missense_Mutation   | Missense_Mutation   | Missense_Mutation   | Missense_Mutation   |
| <b>TP53</b>         | Missense_Mutation   | Missense_Mutation   | Nonsense_Mutation   | Missense_Mutation   | Nonsense_Mutation   | Missense_Mutation   |
| <b>TTN</b>          | Missense_Mutation   | Missense_Mutation   |                     |                     |                     |                     |
| <b>MUC16</b>        |                     |                     | Missense_Mutation   | Missense_Mutation   | Missense_Mutation   |                     |
| <b>PCLO</b>         | Missense_Mutation   |                     | Missense_Mutation   |                     |                     | Missense_Mutation   |
| <b>RYR2</b>         |                     |                     |                     |                     |                     |                     |
| <b>LRP1B</b>        |                     |                     |                     |                     |                     |                     |
| <b>ABCA13</b>       |                     |                     | Missense_Mutation   | Missense_Mutation   |                     |                     |
| <b>CSMD3</b>        |                     |                     |                     | Missense_Mutation   | Missense_Mutation   |                     |
| <b>FLG</b>          |                     |                     |                     |                     | Missense_Mutation   |                     |
| <b>OBSCN</b>        |                     |                     | Missense_Mutation   |                     |                     | Missense_Mutation   |
| <b>CACNA1E</b>      |                     |                     |                     |                     |                     |                     |
| <b>FAT3</b>         |                     |                     |                     |                     |                     |                     |
| <b>ADGRV1</b>       |                     | Missense_Mutation   |                     |                     | Missense_Mutation   |                     |
| <b>DOCK2</b>        |                     |                     |                     |                     |                     |                     |
| <b>HMCN1</b>        |                     |                     | Missense_Mutation   |                     | Missense_Mutation   |                     |
| <b>XIRP2</b>        |                     |                     |                     |                     |                     |                     |
| <b>ALB</b>          |                     |                     |                     |                     |                     |                     |
| <b>APOB</b>         |                     |                     |                     | Nonsense_Mutation   |                     |                     |
| <b>CUBN</b>         |                     |                     |                     |                     |                     | Nonsense_Mutation   |
| <b>HERC2</b>        |                     |                     | Missense_Mutation   |                     |                     |                     |
| <b>PRKDC</b>        |                     |                     |                     |                     |                     |                     |
| <b>SDK1</b>         |                     |                     |                     |                     |                     | Missense_Mutation   |
| <b>DNAH7</b>        |                     |                     |                     | Missense_Mutation   |                     |                     |
| <b>SPTA1</b>        |                     |                     | Missense_Mutation   |                     |                     |                     |
| <b>CCDC168</b>      |                     |                     |                     |                     |                     |                     |
| <b>COL11A1</b>      | Splice_Site         |                     |                     |                     |                     |                     |
| <b>DNAH5</b>        |                     |                     | Missense_Mutation   |                     |                     |                     |
| <b>RYR1</b>         |                     |                     |                     |                     |                     |                     |
| <b>USH2A</b>        |                     |                     |                     |                     |                     | Missense_Mutation   |

| <b>TCGA-G3-A25Z</b> | <b>TCGA-FV-A4ZQ</b> | <b>TCGA-UB-A7MC</b> | <b>TCGA-DD-A1EL</b> | <b>TCGA-DD-AADD</b> | <b>TCGA-UB-A7MD</b> | <b>TCGA-ED-A7PZ</b> |
|---------------------|---------------------|---------------------|---------------------|---------------------|---------------------|---------------------|
| Missense_Mutation   |
| Missense_Mutation   | Missense_Mutation   | Missense_Mutation   | Missense_Mutation   | Missense_Mutation   | Missense_Mutation   | Splice_Site         |
| Nonsense_Mutation   | Missense_Mutation   | Missense_Mutation   |                     |                     |                     |                     |
| Missense_Mutation   |                     |                     | Missense_Mutation   | Missense_Mutation   |                     |                     |
| Missense_Mutation   |                     |                     | Missense_Mutation   |                     | Missense_Mutation   | Missense_Mutation   |
|                     | Missense_Mutation   |                     |                     |                     |                     |                     |
| Missense_Mutation   |                     |                     |                     |                     | Missense_Mutation   |                     |

| TCGA-MI-A75H      | TCGA-DD-AACK      | TCGA-DD-AAW2      | TCGA-DD-AACP      | TCGA-DD-AAC8      | TCGA-DD-AADM      | TCGA-4R-AA8I      |
|-------------------|-------------------|-------------------|-------------------|-------------------|-------------------|-------------------|
| Missense_Mutation |
| Missense_Mutation |
| Missense_Mutation | Multi_Hit         | Missense_Mutation | Missense_Mutation | Missense_Mutation | Missense_Mutation | Missense_Mutation |
|                   |                   |                   |                   |                   | Multi_Hit         |                   |
| Missense_Mutation | Missense_Mutation |                   |                   |                   |                   |                   |
| Missense_Mutation |                   |                   |                   |                   | Nonsense_Mutation |                   |
|                   | Missense_Mutation |                   |                   |                   | Missense_Mutation |                   |
| Missense_Mutation |                   | Missense_Mutation |                   |                   |                   |                   |
|                   |                   |                   |                   |                   | Missense_Mutation | Missense_Mutation |
|                   |                   |                   |                   |                   | Missense_Mutation | Missense_Mutation |
|                   |                   | Missense_Mutation | Missense_Mutation |                   |                   | Missense_Mutation |
| Missense_Mutation |                   |                   |                   |                   |                   |                   |
|                   |                   |                   |                   | Splice_Site       | Splice_Site       | Splice_Site       |
| Missense_Mutation |                   | Missense_Mutation |                   |                   |                   | Nonsense_Mutation |
|                   | Missense_Mutation | Missense_Mutation |                   |                   |                   |                   |
|                   | Missense_Mutation |                   |                   |                   |                   |                   |
|                   |                   |                   |                   |                   | Missense_Mutation |                   |
|                   |                   |                   |                   |                   | Missense_Mutation |                   |

| TCGA-CC-A7IK      | TCGA-DD-A73E      | TCGA-G3-AAV3      | TCGA-FV-A2QQ      | TCGA-DD-AAEB      | TCGA-NI-A8LF      | TCGA-ZP-A9D4      |
|-------------------|-------------------|-------------------|-------------------|-------------------|-------------------|-------------------|
| Missense_Mutation |
| Missense_Mutation |
| Missense_Mutation | Nonsense_Mutation | Missense_Mutation | Missense_Mutation | Missense_Mutation |                   |                   |
| Missense_Mutation | Missense_Mutation |                   |                   |                   | Missense_Mutation |                   |
| Missense_Mutation | Missense_Mutation | Missense_Mutation |                   |                   |                   | Missense_Mutation |
| Missense_Mutation |                   |                   |                   |                   |                   |                   |
|                   |                   |                   | Missense_Mutation |                   |                   |                   |
|                   |                   |                   |                   | Missense_Mutation |                   |                   |
| Missense_Mutation |                   | Missense_Mutation |                   |                   |                   |                   |
|                   |                   |                   |                   | Missense_Mutation |                   |                   |
| Missense_Mutation |                   |                   |                   |                   |                   |                   |
| Splice_Site       |                   |                   |                   |                   |                   | Missense_Mutation |

---

| <b>TCGA-LG-A9QD</b> | <b>TCGA-K7-A6G5</b> | <b>TCGA-G3-A6UC</b> | <b>TCGA-3K-AAZ8</b> | <b>TCGA-DD-A1EJ</b> | <b>TCGA-DD-AACD</b> | <b>TCGA-DD-AAD0</b> |
|---------------------|---------------------|---------------------|---------------------|---------------------|---------------------|---------------------|
| Missense_Mutation   |
| Missense_Mutation   |

Missense\_Mutation

Splice\_Site

Missense\_Mutation

Missense\_Mutation

Missense\_Mutation

---





| TCGA-DD-A4NF      | TCGA-DD-AAVY                           | TCGA-XR-A8TF      | TCGA-DD-AADG      | TCGA-DD-AAEH      | TCGA-2Y-A9HA                           | TCGA-DD-AAW1      |
|-------------------|----------------------------------------|-------------------|-------------------|-------------------|----------------------------------------|-------------------|
| Missense_Mutation | Missense_Mutation                      | Missense_Mutation | Missense_Mutation | Missense_Mutation | Missense_Mutation                      | Missense_Mutation |
| Missense_Mutation | Missense_Mutation                      | Missense_Mutation | Missense_Mutation | Nonsense_Mutation | Missense_Mutation                      | Missense_Mutation |
|                   |                                        |                   |                   | Missense_Mutation |                                        |                   |
| Missense_Mutation |                                        |                   |                   |                   | Missense_Mutation<br>Missense_Mutation |                   |
|                   |                                        |                   |                   |                   |                                        | Missense_Mutation |
| Missense_Mutation |                                        |                   |                   |                   | Multi_Hit                              | Missense_Mutation |
|                   |                                        |                   |                   | Missense_Mutation |                                        |                   |
|                   | Missense_Mutation<br>Missense_Mutation | Splice_Site       |                   |                   |                                        | Missense_Mutation |
|                   | Missense_Mutation                      |                   |                   |                   |                                        | Missense_Mutation |
| Missense_Mutation |                                        |                   |                   |                   |                                        | Missense_Mutation |
|                   |                                        |                   | Missense_Mutation |                   |                                        |                   |

| TCGA-G3-A5SL      | TCGA-DD-AAW3      | TCGA-2Y-A9HB                           | TCGA-CC-A7IL      | TCGA-EP-A2KA      | TCGA-G3-AAV6      | TCGA-2Y-A9H1      |
|-------------------|-------------------|----------------------------------------|-------------------|-------------------|-------------------|-------------------|
| Missense_Mutation | Missense_Mutation | Missense_Mutation                      | Missense_Mutation | Missense_Mutation | Missense_Mutation | Missense_Mutation |
| Missense_Mutation | Missense_Mutation | Nonsense_Mutation<br>Missense_Mutation | Missense_Mutation | Missense_Mutation | Missense_Mutation | Missense_Mutation |
|                   |                   |                                        |                   | Missense_Mutation | Missense_Mutation |                   |
| Missense_Mutation |                   |                                        |                   |                   |                   |                   |
|                   |                   |                                        |                   |                   |                   | Missense_Mutation |

| TCGA-DD-AAE9      | TCGA-DD-A4NK                                                | TCGA-G3-AAV5      | TCGA-G3-AAV2      | TCGA-MI-A75C      | TCGA-DD-AACA      | TCGA-DD-AADE                           |
|-------------------|-------------------------------------------------------------|-------------------|-------------------|-------------------|-------------------|----------------------------------------|
| Missense_Mutation | Missense_Mutation                                           | Missense_Mutation | Missense_Mutation | Missense_Mutation | Missense_Mutation | Missense_Mutation                      |
| Missense_Mutation | Missense_Mutation                                           | Splice_Site       | Missense_Mutation | Missense_Mutation | Missense_Mutation | Missense_Mutation<br>Missense_Mutation |
| Missense_Mutation | Missense_Mutation                                           | Missense_Mutation |                   |                   |                   |                                        |
| Missense_Mutation | Missense_Mutation<br>Missense_Mutation<br>Missense_Mutation |                   |                   |                   |                   | Missense_Mutation                      |

| TCGA-G3-A3CK      | TCGA-5R-AA1C      | TCGA-DD-AAVX      | TCGA-DD-A73A      | TCGA-EP-A26S      | TCGA-RC-A6M4      | TCGA-DD-AAVP      |
|-------------------|-------------------|-------------------|-------------------|-------------------|-------------------|-------------------|
| Missense_Mutation |
| Missense_Mutation | Missense_Mutation | Missense_Mutation | Missense_Mutation |                   |                   |                   |
|                   | Missense_Mutation | Nonsense_Mutation |                   | Missense_Mutation |                   |                   |
|                   |                   |                   |                   |                   | Missense_Mutation | Missense_Mutation |
|                   |                   |                   |                   |                   | Missense_Mutation |                   |
|                   |                   |                   |                   |                   | Missense_Mutation | Missense_Mutation |
|                   | Splice_Site       |                   |                   |                   |                   |                   |
|                   |                   | Missense_Mutation |                   |                   |                   |                   |
|                   |                   |                   |                   |                   | Missense_Mutation |                   |

---

| <b>TCGA-DD-AAEE</b> | <b>TCGA-5C-A9VG</b> | <b>TCGA-DD-A4NI</b> | <b>TCGA-DD-A39V</b> | <b>TCGA-G3-AAV1</b> | <b>TCGA-ZS-A9CG</b> | <b>TCGA-CC-A9FW</b> |
|---------------------|---------------------|---------------------|---------------------|---------------------|---------------------|---------------------|
| Missense_Mutation   |
|                     |                     |                     |                     |                     |                     |                     |
| Missense_Mutation   |                     |                     |                     |                     |                     |                     |
|                     | Missense_Mutation   |                     |                     |                     |                     |                     |
| Missense_Mutation   |                     | Missense_Mutation   |                     |                     |                     |                     |
|                     |                     | Missense_Mutation   |                     |                     |                     |                     |
|                     |                     |                     | Missense_Mutation   | Missense_Mutation   |                     |                     |
|                     |                     |                     |                     |                     | Missense_Mutation   |                     |
|                     |                     | Missense_Mutation   |                     |                     |                     | Missense_Mutation   |
|                     |                     |                     |                     |                     |                     |                     |
|                     |                     |                     | Missense_Mutation   |                     |                     |                     |

---

---

|                     |                     |                     |                     |                     |                     |                     |
|---------------------|---------------------|---------------------|---------------------|---------------------|---------------------|---------------------|
| <b>TCGA-BC-A69H</b> | <b>TCGA-DD-A3A3</b> | <b>TCGA-DD-A3A4</b> | <b>TCGA-DD-A4NL</b> | <b>TCGA-DD-A73D</b> | <b>TCGA-DD-AACJ</b> | <b>TCGA-DD-AACX</b> |
| Missense_Mutation   |

---

Missense\_Mutation

Missense\_Mutation

---

| TCGA-EP-A12J      | TCGA-EP-A3RK      | TCGA-WX-AA47      | TCGA-ZP-A9CV      | TCGA-UB-A7MB      | TCGA-CC-A8HT      | TCGA-DD-A114      |
|-------------------|-------------------|-------------------|-------------------|-------------------|-------------------|-------------------|
| Missense_Mutation | Missense_Mutation | Missense_Mutation | Missense_Mutation | Missense_Mutation |                   |                   |
|                   |                   |                   |                   |                   | Missense_Mutation | Missense_Mutation |
|                   |                   |                   |                   |                   | Missense_Mutation | Missense_Mutation |
|                   |                   |                   |                   |                   | Missense_Mutation | Missense_Mutation |
|                   |                   |                   |                   |                   | Multi_Hit         | Missense_Mutation |
|                   |                   |                   |                   |                   | Missense_Mutation |                   |
|                   |                   |                   |                   |                   | Missense_Mutation |                   |
|                   |                   |                   |                   |                   | Multi_Hit         |                   |
|                   |                   |                   |                   |                   | Missense_Mutation | Missense_Mutation |
|                   |                   |                   |                   |                   |                   |                   |
|                   |                   |                   |                   |                   | Missense_Mutation | Missense_Mutation |
|                   |                   |                   |                   |                   | Missense_Mutation | Missense_Mutation |
|                   |                   |                   |                   |                   | Missense_Mutation | Missense_Mutation |
|                   |                   |                   |                   |                   | Missense_Mutation |                   |
|                   |                   |                   |                   |                   |                   |                   |
|                   |                   |                   |                   |                   | Missense_Mutation |                   |
|                   |                   |                   |                   |                   |                   |                   |
|                   |                   |                   |                   |                   | Nonsense_Mutation |                   |
|                   |                   |                   |                   |                   | Missense_Mutation | Missense_Mutation |

| TCGA-DD-A1EB      | TCGA-2Y-A9GS      | TCGA-MI-A75I      | TCGA-DD-AADL      | TCGA-CC-5263      | TCGA-DD-AAD8      | TCGA-RC-A6M6      |
|-------------------|-------------------|-------------------|-------------------|-------------------|-------------------|-------------------|
| Missense_Mutation | Missense_Mutation | Missense_Mutation | Missense_Mutation | Missense_Mutation | Nonsense_Mutation | Splice_Site       |
| Missense_Mutation |
| Missense_Mutation | Missense_Mutation |                   |                   |                   |                   |                   |
|                   | Missense_Mutation | Missense_Mutation |                   |                   |                   |                   |
|                   |                   |                   | Missense_Mutation |                   |                   |                   |
|                   |                   |                   |                   | Missense_Mutation |                   |                   |
| Missense_Mutation |                   |                   |                   | Missense_Mutation |                   |                   |
|                   |                   |                   | Missense_Mutation |                   |                   |                   |
|                   |                   |                   |                   |                   | Nonsense_Mutation |                   |
|                   |                   |                   |                   |                   |                   | Splice_Site       |
|                   | Missense_Mutation |                   |                   |                   |                   |                   |
|                   |                   |                   |                   | Missense_Mutation |                   |                   |
|                   |                   |                   |                   |                   |                   |                   |
|                   | Missense_Mutation |                   |                   |                   |                   |                   |



---

| TCGA-2Y-A9H8      | TCGA-G3-A5SM      | TCGA-DD-AAEA      | TCGA-FV-A3R2      | TCGA-CC-A8HS      | TCGA-ZP-A9D2      | TCGA-BC-A10U      |
|-------------------|-------------------|-------------------|-------------------|-------------------|-------------------|-------------------|
| Nonsense_Mutation | Missense_Mutation | Splice_Site       | Missense_Mutation | Nonsense_Mutation | Missense_Mutation | Missense_Mutation |
| Missense_Mutation | Nonsense_Mutation | Missense_Mutation | Missense_Mutation | Missense_Mutation | Missense_Mutation | Missense_Mutation |
|                   |                   |                   | Splice_Site       | Missense_Mutation | Missense_Mutation | Missense_Mutation |

Missense\_Mutation

Missense\_Mutation

---

| TCGA-WJ-A86L      | TCGA-MI-A75G      | TCGA-UB-A7MF      | TCGA-CC-A3MA      | TCGA-G3-A25U      | TCGA-K7-A5RG      | TCGA-DD-AAACL     |
|-------------------|-------------------|-------------------|-------------------|-------------------|-------------------|-------------------|
| Missense_Mutation | Nonsense_Mutation | Missense_Mutation | Missense_Mutation | Missense_Mutation | Missense_Mutation | Splice_Site       |
| Nonsense_Mutation | Missense_Mutation | Missense_Mutation | Missense_Mutation | Missense_Mutation | Missense_Mutation | Missense_Mutation |
| Missense_Mutation | Missense_Mutation |                   |                   |                   |                   |                   |
| Missense_Mutation |                   |                   |                   |                   |                   |                   |
|                   |                   | Missense_Mutation |                   |                   |                   |                   |
|                   |                   | Missense_Mutation |                   |                   |                   |                   |
|                   |                   | Missense_Mutation |                   |                   |                   |                   |
|                   |                   | Missense_Mutation | Missense_Mutation |                   |                   |                   |
|                   |                   |                   | Missense_Mutation |                   |                   |                   |
|                   |                   |                   | Missense_Mutation |                   |                   |                   |

---

| TCGA-DD-AADB      | TCGA-T1-A6J8      | TCGA-DD-AACU      | TCGA-DD-AAED      | TCGA-CC-A7IG      | TCGA-DD-AACV      | TCGA-CC-A7II      |
|-------------------|-------------------|-------------------|-------------------|-------------------|-------------------|-------------------|
| Missense_Mutation | Missense_Mutation | Splice_Site       | Missense_Mutation | Splice_Site       | Nonsense_Mutation | Nonsense_Mutation |
| Missense_Mutation |
| Missense_Mutation | Missense_Mutation | Missense_Mutation | Missense_Mutation |                   |                   |                   |
| Missense_Mutation |                   |                   | Missense_Mutation |                   |                   |                   |
|                   |                   |                   | Missense_Mutation | Missense_Mutation | Missense_Mutation |                   |
| Missense_Mutation |                   |                   |                   |                   | Missense_Mutation |                   |
|                   |                   |                   |                   |                   |                   | Nonsense_Mutation |
|                   |                   |                   |                   |                   |                   | Missense_Mutation |
| Splice_Site       |                   |                   | Missense_Mutation |                   |                   |                   |
| Missense_Mutation |                   |                   | Missense_Mutation |                   | Missense_Mutation |                   |

| TCGA-G3-A7M6      | TCGA-BC-A10R      | TCGA-DD-AAE0      | TCGA-BC-A216      | TCGA-2Y-A9GY      | TCGA-CC-A7IJ      | TCGA-ED-A7XO      |
|-------------------|-------------------|-------------------|-------------------|-------------------|-------------------|-------------------|
| Missense_Mutation | Missense_Mutation | Nonsense_Mutation | Missense_Mutation | Missense_Mutation | Missense_Mutation | Missense_Mutation |
| Missense_Mutation | Missense_Mutation | Missense_Mutation | Missense_Mutation |                   |                   |                   |
| Missense_Mutation |                   |                   |                   | Missense_Mutation | Missense_Mutation | Missense_Mutation |
| Missense_Mutation |                   |                   |                   |                   |                   | Missense_Mutation |
|                   | Missense_Mutation |                   |                   |                   |                   |                   |
|                   |                   |                   |                   | Splice_Site       |                   |                   |
| Missense_Mutation |                   |                   |                   |                   |                   |                   |

| TCGA-DD-A3A7      | TCGA-DD-AADC      | TCGA-DD-AAD5      | TCGA-DD-AAVV      | TCGA-ED-A7XP      | TCGA-CC-A8HU      | TCGA-YA-A8S7      |
|-------------------|-------------------|-------------------|-------------------|-------------------|-------------------|-------------------|
| Missense_Mutation | Nonsense_Mutation | Splice_Site       | Missense_Mutation | Missense_Mutation | Missense_Mutation | Missense_Mutation |
| Missense_Mutation |
|                   |                   |                   | Splice_Site       |                   |                   |                   |
| Missense_Mutation |                   |                   |                   |                   | Missense_Mutation |                   |
|                   |                   |                   |                   |                   | Missense_Mutation |                   |
|                   |                   |                   |                   |                   |                   |                   |
|                   |                   |                   | Missense_Mutation | Missense_Mutation |                   |                   |

---

| TCGA-WQ-AB4B | TCGA-QA-A7B7 | TCGA-BC-A217 | TCGA-DD-AACG | TCGA-DD-AADV | TCGA-ED-A459 | TCGA-K7-AAU7 |
|--------------|--------------|--------------|--------------|--------------|--------------|--------------|
|--------------|--------------|--------------|--------------|--------------|--------------|--------------|

---

|                   |                   |                   |                   |                   |                   |                   |
|-------------------|-------------------|-------------------|-------------------|-------------------|-------------------|-------------------|
| Missense_Mutation | Missense_Mutation | Missense_Mutation | Missense_Mutation | Nonsense_Mutation | Missense_Mutation | Missense_Mutation |
|-------------------|-------------------|-------------------|-------------------|-------------------|-------------------|-------------------|

Missense\_Mutation

---

---

| TCGA-WX-AA44      | TCGA-XR-A8TG | TCGA-CC-A8HV      | TCGA-DD-AACS      | TCGA-GJ-A3OU      | TCGA-RC-A7SH      | TCGA-DD-A1EI      |
|-------------------|--------------|-------------------|-------------------|-------------------|-------------------|-------------------|
| Missense_Mutation | Splice_Site  | Missense_Mutation | Missense_Mutation | Missense_Mutation | Missense_Mutation | Missense_Mutation |

Missense\_Mutation

Missense\_Mutation

Missense\_Mutation

Missense\_Mutation

Missense\_Mutation

Missense\_Mutation

Missense\_Mutation

---

---

| <b>TCGA-RC-A7SB</b> | <b>TCGA-FV-A4ZP</b> | <b>TCGA-BD-A3EP</b> | <b>TCGA-CC-A3M9</b> | <b>TCGA-CC-A3MB</b> | <b>TCGA-DD-AAD3</b> | <b>TCGA-DD-AADW</b> |
|---------------------|---------------------|---------------------|---------------------|---------------------|---------------------|---------------------|
| Nonsense_Mutation   | Missense_Mutation   | Missense_Mutation   | Missense_Mutation   | Missense_Mutation   | Missense_Mutation   | Missense_Mutation   |

Missense\_Mutation

Missense\_Mutation

Missense Mutation

---



| TCGA-FV-A3I1      | TCGA-RC-A7SK      | TCGA-CC-A7IH      | TCGA-DD-AACI      | TCGA-DD-A3A9      | TCGA-DD-AACH      | TCGA-CC-A1HT      |
|-------------------|-------------------|-------------------|-------------------|-------------------|-------------------|-------------------|
| Missense_Mutation |
|                   |                   |                   | Missense_Mutation | Missense_Mutation | Missense_Mutation | Missense_Mutation |
|                   |                   |                   | Missense_Mutation | Missense_Mutation |                   |                   |
|                   |                   |                   | Multi_Hit         |                   | Missense_Mutation | Missense_Mutation |
|                   |                   |                   | Multi_Hit         |                   |                   |                   |
|                   |                   |                   | Missense_Mutation |                   |                   |                   |
|                   |                   |                   | Missense_Mutation | Splice_Site       |                   |                   |
|                   |                   |                   | Missense_Mutation |                   |                   |                   |
|                   |                   |                   |                   | Missense_Mutation | Missense_Mutation |                   |
|                   |                   |                   |                   |                   |                   |                   |
|                   |                   |                   | Missense_Mutation |                   |                   |                   |
|                   |                   |                   | Missense_Mutation |                   |                   |                   |
|                   |                   |                   | Missense_Mutation | Nonsense_Mutation |                   |                   |
|                   |                   |                   |                   |                   | Missense_Mutation | Missense_Mutation |
|                   |                   |                   |                   |                   | Missense_Mutation |                   |

| TCGA-ZS-A9CE      | TCGA-WQ-A9G7      | TCGA-G3-AAV0      | TCGA-DD-AACZ      | TCGA-BD-A3ER      | TCGA-DD-A3A8      | TCGA-ES-A2HT      |
|-------------------|-------------------|-------------------|-------------------|-------------------|-------------------|-------------------|
| Missense_Mutation | Nonsense_Mutation | Missense_Mutation | Missense_Mutation | Multi_Hit         | Missense_Mutation | Missense_Mutation |
| Missense_Mutation |
| Missense_Mutation |                   | Missense_Mutation |                   |                   |                   |                   |
| Missense_Mutation |                   |                   | Missense_Mutation |                   |                   |                   |
| Missense_Mutation |                   | Multi_Hit         | Missense_Mutation |                   |                   |                   |
|                   |                   |                   | Missense_Mutation |                   |                   |                   |
|                   |                   | Missense_Mutation |                   |                   |                   |                   |
| Missense_Mutation |                   |                   |                   | Nonsense_Mutation |                   |                   |
|                   | Missense_Mutation |                   | Missense_Mutation |                   |                   |                   |

| TCGA-G3-A5SK      | TCGA-2V-A95S      | TCGA-BC-A10Z      | TCGA-DD-A118      | TCGA-DD-A11A      | TCGA-DD-AACF      | TCGA-NI-A4U2      |
|-------------------|-------------------|-------------------|-------------------|-------------------|-------------------|-------------------|
| Missense_Mutation | Splice_Site       | Missense_Mutation | Missense_Mutation | Missense_Mutation | Missense_Mutation | Missense_Mutation |
| Missense_Mutation |
|                   |                   |                   | Missense_Mutation | Missense_Mutation |                   |                   |
|                   |                   |                   |                   | Missense_Mutation |                   |                   |
| Missense_Mutation |                   |                   |                   |                   |                   |                   |
|                   | Missense_Mutation | Missense_Mutation |                   |                   |                   |                   |
|                   | Missense_Mutation |                   |                   |                   | Nonsense_Mutation |                   |
|                   | Missense_Mutation |                   |                   |                   |                   |                   |

| TCGA-CC-A9FS      | TCGA-BC-A10Q      | TCGA-BW-A5NP      | TCGA-2Y-A9H9      | TCGA-DD-AAD2                           | TCGA-CC-A123      | TCGA-DD-AACQ      |
|-------------------|-------------------|-------------------|-------------------|----------------------------------------|-------------------|-------------------|
| Nonsense_Mutation | Missense_Mutation | Missense_Mutation | Missense_Mutation | Missense_Mutation                      | Missense_Mutation | Missense_Mutation |
| Missense_Mutation | Missense_Mutation | Missense_Mutation | Missense_Mutation | Missense_Mutation<br>Missense_Mutation | Missense_Mutation | Missense_Mutation |
| Missense_Mutation | Missense_Mutation |                   |                   | Missense_Mutation                      |                   |                   |
|                   | Missense_Mutation |                   |                   |                                        |                   |                   |
|                   | Missense_Mutation |                   |                   |                                        | Missense_Mutation |                   |
|                   | Missense_Mutation |                   |                   |                                        |                   |                   |
|                   |                   |                   |                   | Missense_Mutation                      |                   |                   |
|                   |                   | Missense_Mutation |                   |                                        |                   |                   |

| TCGA-DD-AAVU      | TCGA-LG-A6GG      | TCGA-BW-A5NO      | TCGA-G3-A25W      | TCGA-DD-AAACE     | TCGA-DD-AAW0      | TCGA-DD-AACW      |
|-------------------|-------------------|-------------------|-------------------|-------------------|-------------------|-------------------|
| Missense_Mutation |
| Missense_Mutation | Missense_Mutation | Missense_Mutation |                   |                   |                   |                   |
|                   |                   | Missense_Mutation |                   |                   |                   |                   |
|                   |                   | Missense_Mutation |                   |                   |                   |                   |
|                   |                   |                   | Missense_Mutation |                   |                   |                   |
|                   |                   |                   |                   | Nonsense_Mutation |                   |                   |
| Missense_Mutation |                   |                   |                   |                   | Missense_Mutation | Missense_Mutation |
|                   |                   |                   |                   |                   | Missense_Mutation | Missense_Mutation |
|                   |                   |                   |                   |                   |                   |                   |
|                   | Missense_Mutation |                   |                   |                   |                   |                   |
| Missense_Mutation |                   |                   | Missense_Mutation |                   |                   |                   |
| Missense_Mutation |                   |                   |                   |                   |                   |                   |

---

TCGA-BC-A3KF

TCGA-DD-A4NJ

TCGA-5R-AAAM

TCGA-DD-A73G

TCGA-5C-A9VH

TCGA-CC-A9FU

TCGA-DD-A11D

---

Missense\_Mutation

Missense\_Mutation

Missense\_Mutation

Nonsense\_Mutation

Missense\_Mutation

Missense\_Mutation

Missense\_Mutation

Missense\_Mutation

Missense\_Mutation

Missense\_Mutation

Missense\_Mutation

Missense\_Mutation

---

| TCGA-DD-A4NG      | TCGA-DD-AADY      | TCGA-G3-A25T      | TCGA-ZS-A9CF      | TCGA-DD-AADF                           | TCGA-UB-A7ME                           | TCGA-DD-AADS      |
|-------------------|-------------------|-------------------|-------------------|----------------------------------------|----------------------------------------|-------------------|
| Missense_Mutation | Missense_Mutation | Missense_Mutation | Missense_Mutation | Nonsense_Mutation<br>Missense_Mutation | Missense_Mutation                      | Missense_Mutation |
|                   |                   |                   |                   |                                        | Missense_Mutation                      | Missense_Mutation |
|                   |                   |                   |                   |                                        | Missense_Mutation<br>Missense_Mutation | Missense_Mutation |
|                   |                   |                   |                   |                                        | Missense_Mutation                      |                   |
|                   |                   |                   |                   |                                        |                                        | Missense_Mutation |

| TCGA-DD-AAE7      | TCGA-DD-AAVS      | TCGA-DD-AACO      | TCGA-FV-A23B      | TCGA-DD-AADO      | TCGA-DD-AAD6      | TCGA-UB-A7MA      |
|-------------------|-------------------|-------------------|-------------------|-------------------|-------------------|-------------------|
| Missense_Mutation | Missense_Mutation | Missense_Mutation | Missense_Mutation | Missense_Mutation | Missense_Mutation | Nonsense_Mutation |
| Missense_Mutation | Missense_Mutation | Missense_Mutation | Missense_Mutation | Missense_Mutation |                   |                   |
|                   |                   |                   |                   |                   | Missense_Mutation |                   |
|                   |                   |                   |                   |                   |                   | Missense_Mutation |
|                   |                   |                   |                   |                   |                   | Missense_Mutation |
|                   |                   |                   |                   |                   |                   | Missense_Mutation |
|                   |                   |                   |                   |                   | Missense_Mutation |                   |
|                   |                   |                   |                   |                   | Missense_Mutation |                   |
|                   |                   |                   |                   |                   | Missense_Mutation |                   |



| TCGA-DD-A39Z      | TCGA-BC-A10W      | TCGA-CC-A7IF      | TCGA-DD-A4NA      | TCGA-DD-A73F      | TCGA-G3-A7M9      | TCGA-2Y-A9GZ                           |
|-------------------|-------------------|-------------------|-------------------|-------------------|-------------------|----------------------------------------|
| Missense_Mutation | Missense_Mutation | Missense_Mutation | Missense_Mutation | Missense_Mutation | Missense_Mutation | Missense_Mutation<br>Missense_Mutation |
|                   |                   |                   |                   |                   |                   | Nonsense_Mutation                      |
|                   |                   |                   |                   |                   |                   | Missense_Mutation                      |
|                   |                   |                   |                   |                   |                   | Missense_Mutation                      |
| Missense_Mutation |                   |                   |                   |                   |                   |                                        |
|                   | Missense_Mutation |                   |                   |                   |                   |                                        |
|                   | Missense_Mutation | Missense_Mutation | Missense_Mutation |                   |                   |                                        |
|                   |                   |                   |                   |                   |                   | Missense_Mutation                      |
|                   |                   |                   |                   |                   |                   |                                        |

| TCGA-KR-A7K2      | TCGA-EP-A2KC      | TCGA-BC-A10Y      | TCGA-BD-A2L6      | TCGA-DD-A4NV      | TCGA-DD-A113      | TCGA-CC-A5UE                           |
|-------------------|-------------------|-------------------|-------------------|-------------------|-------------------|----------------------------------------|
| Nonsense_Mutation | Missense_Mutation | Missense_Mutation | Missense_Mutation | Missense_Mutation | Missense_Mutation | Missense_Mutation                      |
| Missense_Mutation |                   |                   |                   |                   |                   | Missense_Mutation<br>Missense_Mutation |
| Missense_Mutation | Missense_Mutation | Missense_Mutation |                   |                   |                   |                                        |
|                   |                   |                   | Missense_Mutation |                   |                   |                                        |
|                   |                   |                   |                   | Missense_Mutation | Missense_Mutation |                                        |

| TCGA-DD-A1E9      | TCGA-DD-AAD1      | TCGA-BC-4073      | TCGA-DD-A3A5      | TCGA-RC-A7S9      | TCGA-DD-A4NQ      | TCGA-RC-A6M3      |
|-------------------|-------------------|-------------------|-------------------|-------------------|-------------------|-------------------|
| Missense_Mutation |
| Missense_Mutation | Missense_Mutation |                   |                   |                   |                   |                   |
| Missense_Mutation |                   | Missense_Mutation |                   |                   |                   |                   |
|                   | Missense_Mutation |                   | Missense_Mutation |                   |                   |                   |
|                   |                   |                   |                   | Missense_Mutation | Missense_Mutation |                   |
|                   |                   | Missense_Mutation |                   |                   |                   |                   |
|                   |                   |                   |                   |                   |                   | Missense_Mutation |
|                   |                   |                   |                   | Nonsense_Mutation |                   |                   |
| Missense_Mutation |                   |                   |                   |                   |                   |                   |
|                   |                   | Missense_Mutation |                   |                   |                   |                   |

---

| TCGA-FV-A496 | TCGA-2Y-A9GW | TCGA-FV-A2QR | TCGA-DD-A4NE | TCGA-BC-A10T | TCGA-2Y-A9H5 | TCGA-5C-AAPD |
|--------------|--------------|--------------|--------------|--------------|--------------|--------------|
|--------------|--------------|--------------|--------------|--------------|--------------|--------------|

---

Missense\_Mutation

Missense\_Mutation

Missense\_Mutation

Missense\_Mutation

Missense\_Mutation

Missense\_Mutation

Splice\_Site

Missense\_Mutation

Missense\_Mutation

Missense\_Mutation

Missense\_Mutation

Missense\_Mutation

Missense\_Mutation

Missense\_Mutation

Missense\_Mutation

---

---

TCGA-CC-5264

TCGA-DD-A11C

TCGA-DD-AAE2

TCGA-G3-A3CG

TCGA-ED-A4XI

TCGA-CC-A7IE

TCGA-2Y-A9GV

---

Missense\_Mutation

Missense\_Mutation

Missense\_Mutation

Missense\_Mutation

Missense\_Mutation

Missense\_Mutation  
Missense\_Mutation

Missense\_Mutation

Nonsense\_Mutation

Missense\_Mutation

Missense\_Mutation

Missense\_Mutation

---

---

**TCGA-CC-5258****TCGA-DD-AADI****TCGA-DD-AAVZ****TCGA-ED-A805****TCGA-2Y-A9H3****TCGA-BC-A8YO****TCGA-DD-A4NH**

---

Missense\_Mutation

Missense\_Mutation

Nonsense\_Mutation

Missense\_Mutation

Nonsense\_Mutation

Missense\_Mutation

Missense\_Mutation

Missense\_Mutation

Missense\_Mutation

Missense\_Mutation

Missense\_Mutation

Missense\_Mutation">

---

---

TCGA-DD-AADR

TCGA-G3-A7M7

TCGA-LG-A9QC

TCGA-DD-AACT

TCGA-DD-A4NN

TCGA-CC-A5UC

TCGA-G3-A7M5

---

Missense\_Mutation

Missense\_Mutation

Missense\_Mutation

Missense\_Mutation

Missense\_Mutation  
Missense\_Mutation

Missense\_Mutation

Missense\_Mutation

Missense\_Mutation

Missense\_Mutation  
Missense\_Mutation

Splice\_Site

---

---

TCGA-G3-A25Y

TCGA-MR-A520

TCGA-DD-AACN

TCGA-ZP-A9CY

TCGA-2Y-A9GX

TCGA-2Y-A9H2

TCGA-DD-AAEI

---

Missense\_Mutation

Missense\_Mutation

Missense\_Mutation

Missense\_Mutation

Missense\_Mutation

Missense\_Mutation

Missense\_Mutation

Splice\_Site

Missense\_Mutation

---



---

| TCGA-ED-A806 | TCGA-2Y-A9GT | TCGA-DD-A1EF | TCGA-ZP-A9D1 | TCGA-DD-AAE8 | TCGA-ED-A7PY | TCGA-DD-AADJ |
|--------------|--------------|--------------|--------------|--------------|--------------|--------------|
|--------------|--------------|--------------|--------------|--------------|--------------|--------------|

---

Nonsense\_Mutation  
Missense\_Mutation

Missense\_Mutation  
Missense\_Mutation

Nonsense\_Mutation

Missense\_Mutation

Missense\_Mutation

Missense\_Mutation

Nonsense\_Mutation

Missense\_Mutation

Missense\_Mutation

---

---

TCGA-DD-AAVR

TCGA-G3-A25S

TCGA-ES-A2HS

TCGA-CC-5259

TCGA-HP-A5MZ

TCGA-DD-A1EK

TCGA-G3-A3CI

---

Missense\_Mutation

Missense\_Mutation

Missense\_Mutation

Splice\_Site

Missense\_Mutation

Missense\_Mutation

Missense\_Mutation

Nonsense\_Mutation

Missense\_Mutation

Missense\_Mutation

---

---

TCGA-DD-A1ED

TCGA-EP-A2KB

TCGA-G3-AAV7

TCGA-GJ-A9DB

TCGA-DD-A1EA

TCGA-DD-AACM

TCGA-DD-AAVQ

---

Missense\_Mutation

Missense\_Mutation

Missense\_Mutation

Missense\_Mutation

Missense\_Mutation

Missense\_Mutation

Missense\_Mutation

---

---

TCGA-MI-A75E

TCGA-WX-AA46

TCGA-KR-A7K7

TCGA-2Y-A9H0

TCGA-2Y-A9H7

TCGA-DD-AAE6

TCGA-G3-AAUZ

---

Missense\_Mutation

Missense\_Mutation  
Missense\_Mutation

Missense\_Mutation

Missense\_Mutation

Missense\_Mutation

Missense\_Mutation

Splice\_Site

Missense\_Mutation

Missense\_Mutation

---

---

TCGA-FV-A3I0

TCGA-UB-AA0V

TCGA-XR-A8TD

TCGA-DD-AADK

TCGA-DD-AAE3

TCGA-G3-A25V

TCGA-DD-A73B

---

Missense\_Mutation

Missense\_Mutation

Missense\_Mutation

Missense\_Mutation

Missense\_Mutation

Missense\_Mutation

Missense\_Mutation

Missense\_Mutation

Multi Hit

---

---

TCGA-KR-A7K8

TCGA-DD-AADQ

TCGA-DD-AAVW

TCGA-DD-AAEG

TCGA-2Y-A9GU

---

Missense\_Mutation

Nonsense\_Mutation

Missense\_Mutation

Missense\_Mutation

Missense\_Mutation

---

**Table S8. Tumor mutation burden in TCHA-LIHC patients.**

| Tumor Sample Barcode | total | total perMB | total perMB log |
|----------------------|-------|-------------|-----------------|
| TCGA-ED-A5KG         | 4     | 0.08        | -1.096910013    |
| TCGA-XR-A8TE         | 7     | 0.14        | -0.853871964    |
| TCGA-5R-AA1D         | 8     | 0.16        | -0.795880017    |
| TCGA-DD-A1ED         | 8     | 0.16        | -0.795880017    |
| TCGA-DD-A3A6         | 9     | 0.18        | -0.744727495    |
| TCGA-CC-A9FV         | 11    | 0.22        | -0.657577319    |
| TCGA-G3-A3CI         | 11    | 0.22        | -0.657577319    |
| TCGA-RC-A6M5         | 11    | 0.22        | -0.657577319    |
| TCGA-MR-A520         | 12    | 0.24        | -0.619788758    |
| TCGA-DD-A4NB         | 13    | 0.26        | -0.585026652    |
| TCGA-DD-A4NP         | 15    | 0.3         | -0.522878745    |
| TCGA-G3-A7M8         | 15    | 0.3         | -0.522878745    |
| TCGA-G3-A5SI         | 16    | 0.32        | -0.494850022    |
| TCGA-DD-A4NL         | 17    | 0.34        | -0.468521083    |
| TCGA-DD-A1EC         | 18    | 0.36        | -0.443697499    |
| TCGA-G3-A25V         | 18    | 0.36        | -0.443697499    |
| TCGA-BC-A10Q         | 19    | 0.38        | -0.420216403    |
| TCGA-MR-A8JO         | 19    | 0.38        | -0.420216403    |
| TCGA-ED-A82E         | 20    | 0.4         | -0.397940009    |
| TCGA-DD-A1EH         | 21    | 0.42        | -0.37675071     |
| TCGA-DD-A4NS         | 21    | 0.42        | -0.37675071     |
| TCGA-DD-A4NA         | 22    | 0.44        | -0.356547324    |
| TCGA-DD-AAVW         | 22    | 0.44        | -0.356547324    |
| TCGA-ED-A7PX         | 23    | 0.46        | -0.337242168    |
| TCGA-ED-A7PY         | 23    | 0.46        | -0.337242168    |
| TCGA-K7-A5RF         | 23    | 0.46        | -0.337242168    |
| TCGA-UB-AA0V         | 23    | 0.46        | -0.337242168    |
| TCGA-G3-A3CH         | 25    | 0.5         | -0.301029996    |
| TCGA-G3-A25T         | 26    | 0.52        | -0.283996656    |
| TCGA-WX-AA47         | 26    | 0.52        | -0.283996656    |
| TCGA-DD-AAVZ         | 27    | 0.54        | -0.26760624     |
| TCGA-DD-A3A4         | 28    | 0.56        | -0.251811973    |
| TCGA-ED-A66X         | 28    | 0.56        | -0.251811973    |
| TCGA-DD-A4NR         | 29    | 0.58        | -0.236572006    |
| TCGA-HP-A5MZ         | 29    | 0.58        | -0.236572006    |
| TCGA-KR-A7K8         | 29    | 0.58        | -0.236572006    |
| TCGA-2Y-A9GX         | 30    | 0.6         | -0.22184875     |
| TCGA-DD-AADW         | 30    | 0.6         | -0.22184875     |
| TCGA-FV-A3R3         | 30    | 0.6         | -0.22184875     |
| TCGA-2Y-A9H2         | 31    | 0.62        | -0.207608311    |
| TCGA-DD-AA3A         | 31    | 0.62        | -0.207608311    |
| TCGA-LG-A9QC         | 31    | 0.62        | -0.207608311    |
| TCGA-PD-A5DF         | 31    | 0.62        | -0.207608311    |
| TCGA-DD-A39W         | 32    | 0.64        | -0.193820026    |
| TCGA-DD-AACO         | 32    | 0.64        | -0.193820026    |
| TCGA-CC-5260         | 33    | 0.66        | -0.180456064    |
| TCGA-CC-A3MA         | 33    | 0.66        | -0.180456064    |
| TCGA-EP-A12J         | 33    | 0.66        | -0.180456064    |
| TCGA-WX-AA46         | 33    | 0.66        | -0.180456064    |
| TCGA-2Y-A9H6         | 34    | 0.68        | -0.167491087    |
| TCGA-KR-A7K2         | 34    | 0.68        | -0.167491087    |
| TCGA-DD-AACN         | 35    | 0.7         | -0.15490196     |
| TCGA-GJ-A6C0         | 35    | 0.7         | -0.15490196     |
| TCGA-DD-A11B         | 36    | 0.72        | -0.142667504    |
| TCGA-DD-A4NN         | 36    | 0.72        | -0.142667504    |
| TCGA-DD-AADY         | 36    | 0.72        | -0.142667504    |

|              |    |      |              |
|--------------|----|------|--------------|
| TCGA-ED-A97K | 36 | 0.72 | -0.142667504 |
| TCGA-EP-A3RK | 36 | 0.72 | -0.142667504 |
| TCGA-BD-A3ER | 37 | 0.74 | -0.13076828  |
| TCGA-DD-A3A3 | 37 | 0.74 | -0.13076828  |
| TCGA-DD-A4NH | 37 | 0.74 | -0.13076828  |
| TCGA-DD-AAVQ | 37 | 0.74 | -0.13076828  |
| TCGA-GJ-A3OU | 37 | 0.74 | -0.13076828  |
| TCGA-CC-A9FU | 38 | 0.76 | -0.119186408 |
| TCGA-DD-A1EI | 38 | 0.76 | -0.119186408 |
| TCGA-DD-A4ND | 38 | 0.76 | -0.119186408 |
| TCGA-DD-AAE1 | 38 | 0.76 | -0.119186408 |
| TCGA-G3-AAV1 | 38 | 0.76 | -0.119186408 |
| TCGA-CC-A5UC | 40 | 0.8  | -0.096910013 |
| TCGA-CC-A8HS | 40 | 0.8  | -0.096910013 |
| TCGA-DD-A1E9 | 40 | 0.8  | -0.096910013 |
| TCGA-DD-AAVS | 40 | 0.8  | -0.096910013 |
| TCGA-G3-AAV2 | 40 | 0.8  | -0.096910013 |
| TCGA-RC-A7SB | 40 | 0.8  | -0.096910013 |
| TCGA-ZP-A9CZ | 40 | 0.8  | -0.096910013 |
| TCGA-DD-A1EJ | 41 | 0.82 | -0.086186148 |
| TCGA-DD-A4NE | 41 | 0.82 | -0.086186148 |
| TCGA-DD-AACW | 41 | 0.82 | -0.086186148 |
| TCGA-G3-A7M7 | 41 | 0.82 | -0.086186148 |
| TCGA-DD-A4NO | 42 | 0.84 | -0.075720714 |
| TCGA-DD-AACS | 42 | 0.84 | -0.075720714 |
| TCGA-DD-AADK | 42 | 0.84 | -0.075720714 |
| TCGA-XR-A8TC | 42 | 0.84 | -0.075720714 |
| TCGA-ZP-A9D0 | 42 | 0.84 | -0.075720714 |
| TCGA-DD-A119 | 43 | 0.86 | -0.065501549 |
| TCGA-WQ-AB4B | 43 | 0.86 | -0.065501549 |
| TCGA-RC-A7S9 | 44 | 0.88 | -0.055517328 |
| TCGA-DD-AACM | 45 | 0.9  | -0.045757491 |
| TCGA-DD-AAE8 | 45 | 0.9  | -0.045757491 |
| TCGA-G3-A25U | 45 | 0.9  | -0.045757491 |
| TCGA-YA-A8S7 | 45 | 0.9  | -0.045757491 |
| TCGA-DD-AAVU | 46 | 0.92 | -0.036212173 |
| TCGA-ED-A7XO | 46 | 0.92 | -0.036212173 |
| TCGA-G3-AAV6 | 46 | 0.92 | -0.036212173 |
| TCGA-BC-A10Y | 47 | 0.94 | -0.026872146 |
| TCGA-DD-A39X | 47 | 0.94 | -0.026872146 |
| TCGA-DD-AAE0 | 47 | 0.94 | -0.026872146 |
| TCGA-G3-A25Y | 47 | 0.94 | -0.026872146 |
| TCGA-XR-A8TD | 47 | 0.94 | -0.026872146 |
| TCGA-BC-A216 | 48 | 0.96 | -0.017728767 |
| TCGA-BC-A8YO | 48 | 0.96 | -0.017728767 |
| TCGA-DD-A73F | 48 | 0.96 | -0.017728767 |
| TCGA-DD-AAE4 | 48 | 0.96 | -0.017728767 |
| TCGA-DD-AAVR | 48 | 0.96 | -0.017728767 |
| TCGA-ZP-A9D2 | 48 | 0.96 | -0.017728767 |
| TCGA-ED-A7XP | 49 | 0.98 | -0.008773924 |
| TCGA-ES-A2HS | 49 | 0.98 | -0.008773924 |
| TCGA-BW-A5NP | 50 | 1    | 0            |
| TCGA-G3-A25W | 50 | 1    | 0            |
| TCGA-2Y-A9GV | 51 | 1.02 | 0.008600172  |
| TCGA-5C-AAPD | 51 | 1.02 | 0.008600172  |
| TCGA-5R-AAAM | 51 | 1.02 | 0.008600172  |
| TCGA-CC-A3MB | 51 | 1.02 | 0.008600172  |
| TCGA-2Y-A9GS | 52 | 1.04 | 0.017033339  |
| TCGA-DD-A3A5 | 52 | 1.04 | 0.017033339  |



|              |    |      |             |
|--------------|----|------|-------------|
| TCGA-DD-A73C | 52 | 1.04 | 0.017033339 |
| TCGA-DD-AADJ | 52 | 1.04 | 0.017033339 |
| TCGA-ED-A8O6 | 52 | 1.04 | 0.017033339 |
| TCGA-ES-A2HT | 52 | 1.04 | 0.017033339 |
| TCGA-KR-A7K7 | 52 | 1.04 | 0.017033339 |
| TCGA-UB-A7MC | 52 | 1.04 | 0.017033339 |
| TCGA-2Y-A9H4 | 53 | 1.06 | 0.025305865 |
| TCGA-DD-A1EK | 53 | 1.06 | 0.025305865 |
| TCGA-DD-A39V | 53 | 1.06 | 0.025305865 |
| TCGA-DD-AAD3 | 53 | 1.06 | 0.025305865 |
| TCGA-K7-A6G5 | 53 | 1.06 | 0.025305865 |
| TCGA-RC-A7SH | 53 | 1.06 | 0.025305865 |
| TCGA-ZP-A9D4 | 53 | 1.06 | 0.025305865 |
| TCGA-BC-A5W4 | 54 | 1.08 | 0.033423755 |
| TCGA-DD-A4NG | 54 | 1.08 | 0.033423755 |
| TCGA-DD-A73D | 54 | 1.08 | 0.033423755 |
| TCGA-G3-A25Z | 54 | 1.08 | 0.033423755 |
| TCGA-DD-A3A2 | 55 | 1.1  | 0.041392685 |
| TCGA-DD-AAED | 55 | 1.1  | 0.041392685 |
| TCGA-K7-AAU7 | 55 | 1.1  | 0.041392685 |
| TCGA-BC-A69H | 56 | 1.12 | 0.049218023 |
| TCGA-DD-AACC | 56 | 1.12 | 0.049218023 |
| TCGA-O8-A75V | 56 | 1.12 | 0.049218023 |
| TCGA-UB-A7MA | 56 | 1.12 | 0.049218023 |
| TCGA-UB-AA0U | 56 | 1.12 | 0.049218023 |
| TCGA-2Y-A9GW | 57 | 1.14 | 0.056904851 |
| TCGA-2Y-A9H8 | 57 | 1.14 | 0.056904851 |
| TCGA-2Y-A9HB | 57 | 1.14 | 0.056904851 |
| TCGA-DD-A4NK | 57 | 1.14 | 0.056904851 |
| TCGA-FV-A3I1 | 57 | 1.14 | 0.056904851 |
| TCGA-RC-A7SF | 57 | 1.14 | 0.056904851 |
| TCGA-2Y-A9H5 | 58 | 1.16 | 0.064457989 |
| TCGA-BC-A10T | 58 | 1.16 | 0.064457989 |
| TCGA-BD-A2L6 | 58 | 1.16 | 0.064457989 |
| TCGA-DD-A39Z | 58 | 1.16 | 0.064457989 |
| TCGA-EP-A2KC | 58 | 1.16 | 0.064457989 |
| TCGA-FV-A23B | 58 | 1.16 | 0.064457989 |
| TCGA-FV-A4ZQ | 58 | 1.16 | 0.064457989 |
| TCGA-2Y-A9GY | 59 | 1.18 | 0.071882007 |
| TCGA-DD-AAEE | 59 | 1.18 | 0.071882007 |
| TCGA-DD-AAEK | 59 | 1.18 | 0.071882007 |
| TCGA-DD-AAVP | 59 | 1.18 | 0.071882007 |
| TCGA-DD-AAVX | 59 | 1.18 | 0.071882007 |
| TCGA-CC-A123 | 60 | 1.2  | 0.079181246 |
| TCGA-DD-A4NQ | 60 | 1.2  | 0.079181246 |
| TCGA-DD-AACY | 60 | 1.2  | 0.079181246 |
| TCGA-DD-AAD2 | 60 | 1.2  | 0.079181246 |
| TCGA-G3-AAV5 | 60 | 1.2  | 0.079181246 |
| TCGA-WX-AA44 | 60 | 1.2  | 0.079181246 |
| TCGA-DD-AACE | 61 | 1.22 | 0.086359831 |
| TCGA-DD-AAE2 | 61 | 1.22 | 0.086359831 |
| TCGA-FV-A3R2 | 61 | 1.22 | 0.086359831 |
| TCGA-G3-A5SK | 61 | 1.22 | 0.086359831 |
| TCGA-GJ-A9DB | 61 | 1.22 | 0.086359831 |
| TCGA-RC-A6M3 | 61 | 1.22 | 0.086359831 |
| TCGA-XR-A8TG | 61 | 1.22 | 0.086359831 |
| TCGA-DD-A115 | 62 | 1.24 | 0.093421685 |
| TCGA-DD-A4NJ | 62 | 1.24 | 0.093421685 |
| TCGA-FV-A3I0 | 62 | 1.24 | 0.093421685 |

|              |    |      |             |
|--------------|----|------|-------------|
| TCGA-2Y-A9H0 | 63 | 1.26 | 0.100370545 |
| TCGA-CC-A1HT | 63 | 1.26 | 0.100370545 |
| TCGA-DD-AAE6 | 63 | 1.26 | 0.100370545 |
| TCGA-G3-AAUZ | 63 | 1.26 | 0.100370545 |
| TCGA-G3-AAV7 | 63 | 1.26 | 0.100370545 |
| TCGA-DD-AAC9 | 64 | 1.28 | 0.10720997  |
| TCGA-RG-A7D4 | 64 | 1.28 | 0.10720997  |
| TCGA-ZS-A9CG | 64 | 1.28 | 0.10720997  |
| TCGA-DD-A1EA | 65 | 1.3  | 0.113943352 |
| TCGA-DD-AADC | 65 | 1.3  | 0.113943352 |
| TCGA-EP-A26S | 66 | 1.32 | 0.120573931 |
| TCGA-FV-A4ZP | 66 | 1.32 | 0.120573931 |
| TCGA-T1-A6J8 | 66 | 1.32 | 0.120573931 |
| TCGA-ZP-A9CY | 66 | 1.32 | 0.120573931 |
| TCGA-DD-A73B | 67 | 1.34 | 0.127104798 |
| TCGA-DD-AAEH | 67 | 1.34 | 0.127104798 |
| TCGA-2Y-A9GZ | 68 | 1.36 | 0.133538908 |
| TCGA-2Y-A9H7 | 68 | 1.36 | 0.133538908 |
| TCGA-BC-A3KF | 68 | 1.36 | 0.133538908 |
| TCGA-KR-A7K0 | 68 | 1.36 | 0.133538908 |
| TCGA-UB-A7ME | 68 | 1.36 | 0.133538908 |
| TCGA-EP-A2KB | 69 | 1.38 | 0.139879086 |
| TCGA-G3-AAV3 | 69 | 1.38 | 0.139879086 |
| TCGA-2V-A95S | 70 | 1.4  | 0.146128036 |
| TCGA-BW-A5NQ | 70 | 1.4  | 0.146128036 |
| TCGA-DD-A11C | 70 | 1.4  | 0.146128036 |
| TCGA-DD-AACD | 70 | 1.4  | 0.146128036 |
| TCGA-DD-AADR | 70 | 1.4  | 0.146128036 |
| TCGA-FV-A495 | 70 | 1.4  | 0.146128036 |
| TCGA-CC-A3MC | 71 | 1.42 | 0.152288344 |
| TCGA-DD-AACB | 71 | 1.42 | 0.152288344 |
| TCGA-DD-AAEG | 71 | 1.42 | 0.152288344 |
| TCGA-DD-AAVV | 71 | 1.42 | 0.152288344 |
| TCGA-DD-AAW3 | 71 | 1.42 | 0.152288344 |
| TCGA-G3-A7M6 | 71 | 1.42 | 0.152288344 |
| TCGA-QA-A7B7 | 71 | 1.42 | 0.152288344 |
| TCGA-ZS-A9CF | 71 | 1.42 | 0.152288344 |
| TCGA-CC-A8HU | 72 | 1.44 | 0.158362492 |
| TCGA-DD-A1EL | 72 | 1.44 | 0.158362492 |
| TCGA-2Y-A9GT | 73 | 1.46 | 0.164352856 |
| TCGA-5R-AA1C | 73 | 1.46 | 0.164352856 |
| TCGA-DD-A1EF | 73 | 1.46 | 0.164352856 |
| TCGA-DD-AADV | 73 | 1.46 | 0.164352856 |
| TCGA-DD-AADD | 74 | 1.48 | 0.170261715 |
| TCGA-ED-A66Y | 74 | 1.48 | 0.170261715 |
| TCGA-DD-A73G | 75 | 1.5  | 0.176091259 |
| TCGA-DD-AAVY | 75 | 1.5  | 0.176091259 |
| TCGA-EP-A3JL | 75 | 1.5  | 0.176091259 |
| TCGA-DD-AADI | 76 | 1.52 | 0.181843588 |
| TCGA-CC-5264 | 77 | 1.54 | 0.187520721 |
| TCGA-DD-A114 | 77 | 1.54 | 0.187520721 |
| TCGA-DD-A73A | 77 | 1.54 | 0.187520721 |
| TCGA-DD-AACH | 77 | 1.54 | 0.187520721 |
| TCGA-DD-AACJ | 77 | 1.54 | 0.187520721 |
| TCGA-DD-AAW0 | 77 | 1.54 | 0.187520721 |
| TCGA-ZS-A9CD | 77 | 1.54 | 0.187520721 |
| TCGA-BW-A5NO | 78 | 1.56 | 0.193124598 |
| TCGA-DD-A116 | 78 | 1.56 | 0.193124598 |
| TCGA-G3-A3CG | 78 | 1.56 | 0.193124598 |

|              |    |      |             |
|--------------|----|------|-------------|
| TCGA-LG-A9QD | 78 | 1.56 | 0.193124598 |
| TCGA-BD-A3EP | 79 | 1.58 | 0.198657087 |
| TCGA-DD-AADU | 79 | 1.58 | 0.198657087 |
| TCGA-G3-A25S | 79 | 1.58 | 0.198657087 |
| TCGA-UB-A7MF | 79 | 1.58 | 0.198657087 |
| TCGA-5C-A9VH | 80 | 1.6  | 0.204119983 |
| TCGA-BC-A10W | 80 | 1.6  | 0.204119983 |
| TCGA-BC-A217 | 80 | 1.6  | 0.204119983 |
| TCGA-DD-AACG | 81 | 1.62 | 0.209515015 |
| TCGA-G3-A5SJ | 81 | 1.62 | 0.209515015 |
| TCGA-NI-A8LF | 81 | 1.62 | 0.209515015 |
| TCGA-UB-A7MD | 82 | 1.64 | 0.214843848 |
| TCGA-DD-A4NV | 83 | 1.66 | 0.220108088 |
| TCGA-DD-AADE | 83 | 1.66 | 0.220108088 |
| TCGA-EP-A2KA | 83 | 1.66 | 0.220108088 |
| TCGA-FV-A2QR | 83 | 1.66 | 0.220108088 |
| TCGA-ZP-A9CV | 83 | 1.66 | 0.220108088 |
| TCGA-DD-AADN | 84 | 1.68 | 0.225309282 |
| TCGA-FV-A496 | 84 | 1.68 | 0.225309282 |
| TCGA-G3-AAV4 | 84 | 1.68 | 0.225309282 |
| TCGA-NI-A4U2 | 84 | 1.68 | 0.225309282 |
| TCGA-CC-A7IL | 85 | 1.7  | 0.230448921 |
| TCGA-DD-AAD6 | 85 | 1.7  | 0.230448921 |
| TCGA-DD-AADA | 85 | 1.7  | 0.230448921 |
| TCGA-G3-A7M9 | 85 | 1.7  | 0.230448921 |
| TCGA-DD-AAD1 | 86 | 1.72 | 0.235528447 |
| TCGA-DD-AAE9 | 86 | 1.72 | 0.235528447 |
| TCGA-MI-A75E | 86 | 1.72 | 0.235528447 |
| TCGA-CC-A9FS | 87 | 1.74 | 0.240549248 |
| TCGA-DD-AAW1 | 87 | 1.74 | 0.240549248 |
| TCGA-ED-A4XI | 87 | 1.74 | 0.240549248 |
| TCGA-G3-A5SM | 87 | 1.74 | 0.240549248 |
| TCGA-MI-A75C | 87 | 1.74 | 0.240549248 |
| TCGA-CC-A3M9 | 88 | 1.76 | 0.245512668 |
| TCGA-DD-A11A | 88 | 1.76 | 0.245512668 |
| TCGA-G3-A5SL | 88 | 1.76 | 0.245512668 |
| TCGA-BC-A10R | 89 | 1.78 | 0.250420002 |
| TCGA-K7-A5RG | 89 | 1.78 | 0.250420002 |
| TCGA-DD-A3A8 | 90 | 1.8  | 0.255272505 |
| TCGA-DD-AACV | 90 | 1.8  | 0.255272505 |
| TCGA-DD-AADP | 90 | 1.8  | 0.255272505 |
| TCGA-DD-A11D | 91 | 1.82 | 0.260071388 |
| TCGA-DD-A73E | 91 | 1.82 | 0.260071388 |
| TCGA-DD-AACA | 91 | 1.82 | 0.260071388 |
| TCGA-DD-AAD0 | 92 | 1.84 | 0.264817823 |
| TCGA-5C-A9VG | 93 | 1.86 | 0.269512944 |
| TCGA-CC-A7IF | 93 | 1.86 | 0.269512944 |
| TCGA-DD-A3A7 | 93 | 1.86 | 0.269512944 |
| TCGA-DD-AAD5 | 94 | 1.88 | 0.274157849 |
| TCGA-DD-AAD8 | 94 | 1.88 | 0.274157849 |
| TCGA-HP-A5N0 | 94 | 1.88 | 0.274157849 |
| TCGA-ZS-A9CE | 95 | 1.9  | 0.278753601 |
| TCGA-FV-A2QQ | 96 | 1.92 | 0.283301229 |
| TCGA-G3-A6UC | 96 | 1.92 | 0.283301229 |
| TCGA-CC-5263 | 97 | 1.94 | 0.28780173  |
| TCGA-DD-A118 | 97 | 1.94 | 0.28780173  |
| TCGA-DD-A4NF | 97 | 1.94 | 0.28780173  |
| TCGA-DD-AACU | 97 | 1.94 | 0.28780173  |
| TCGA-DD-AADQ | 97 | 1.94 | 0.28780173  |

|              |     |      |             |
|--------------|-----|------|-------------|
| TCGA-DD-AAEI | 97  | 1.94 | 0.28780173  |
| TCGA-DD-AAW2 | 97  | 1.94 | 0.28780173  |
| TCGA-ED-A8O5 | 97  | 1.94 | 0.28780173  |
| TCGA-DD-AACF | 98  | 1.96 | 0.292256071 |
| TCGA-DD-AADB | 98  | 1.96 | 0.292256071 |
| TCGA-DD-AAEB | 98  | 1.96 | 0.292256071 |
| TCGA-2Y-A9H9 | 100 | 2    | 0.301029996 |
| TCGA-DD-AACX | 101 | 2.02 | 0.305351369 |
| TCGA-BC-4073 | 102 | 2.04 | 0.309630167 |
| TCGA-CC-5258 | 102 | 2.04 | 0.309630167 |
| TCGA-DD-A113 | 103 | 2.06 | 0.31386722  |
| TCGA-DD-A4NI | 103 | 2.06 | 0.31386722  |
| TCGA-DD-AADL | 103 | 2.06 | 0.31386722  |
| TCGA-CC-A5UE | 105 | 2.1  | 0.322219295 |
| TCGA-MI-A75H | 105 | 2.1  | 0.322219295 |
| TCGA-2Y-A9GU | 106 | 2.12 | 0.326335861 |
| TCGA-BC-A10U | 106 | 2.12 | 0.326335861 |
| TCGA-RC-A7SK | 106 | 2.12 | 0.326335861 |
| TCGA-WJ-A86L | 106 | 2.12 | 0.326335861 |
| TCGA-CC-5262 | 107 | 2.14 | 0.330413773 |
| TCGA-ZP-A9D1 | 107 | 2.14 | 0.330413773 |
| TCGA-3K-AAZ8 | 108 | 2.16 | 0.334453751 |
| TCGA-2Y-A9H1 | 109 | 2.18 | 0.338456494 |
| TCGA-2Y-A9H3 | 109 | 2.18 | 0.338456494 |
| TCGA-DD-AACK | 110 | 2.2  | 0.342422681 |
| TCGA-CC-A7IG | 111 | 2.22 | 0.346352974 |
| TCGA-XR-A8TF | 111 | 2.22 | 0.346352974 |
| TCGA-2Y-A9HA | 112 | 2.24 | 0.350248018 |
| TCGA-CC-5259 | 112 | 2.24 | 0.350248018 |
| TCGA-DD-A1EB | 112 | 2.24 | 0.350248018 |
| TCGA-DD-AAE3 | 113 | 2.26 | 0.354108439 |
| TCGA-CC-A8HV | 114 | 2.28 | 0.357934847 |
| TCGA-DD-AADS | 114 | 2.28 | 0.357934847 |
| TCGA-DD-AADG | 116 | 2.32 | 0.365487985 |
| TCGA-CC-A7IJ | 119 | 2.38 | 0.376576957 |
| TCGA-DD-AACP | 123 | 2.46 | 0.390935107 |
| TCGA-CC-A9FW | 124 | 2.48 | 0.394451681 |
| TCGA-CC-A7II | 127 | 2.54 | 0.404833717 |
| TCGA-G3-AAV0 | 129 | 2.58 | 0.411619706 |
| TCGA-MI-A75I | 133 | 2.66 | 0.424881637 |
| TCGA-DD-AADM | 134 | 2.68 | 0.428134794 |
| TCGA-BC-A10Z | 137 | 2.74 | 0.437750563 |
| TCGA-CC-A7IE | 137 | 2.74 | 0.437750563 |
| TCGA-G3-A7M5 | 139 | 2.78 | 0.444044796 |
| TCGA-DD-AACZ | 145 | 2.9  | 0.462397998 |
| TCGA-RC-A6M4 | 145 | 2.9  | 0.462397998 |
| TCGA-DD-AAEA | 147 | 2.94 | 0.46834733  |
| TCGA-RC-A6M6 | 150 | 3    | 0.477121255 |
| TCGA-ED-A459 | 152 | 3.04 | 0.482873584 |
| TCGA-DD-AACT | 160 | 3.2  | 0.505149978 |
| TCGA-DD-AADO | 161 | 3.22 | 0.507855872 |
| TCGA-CC-A5UD | 163 | 3.26 | 0.5132176   |
| TCGA-CC-A8HT | 164 | 3.28 | 0.515873844 |
| TCGA-LG-A6GG | 164 | 3.28 | 0.515873844 |
| TCGA-G3-A3CK | 169 | 3.38 | 0.5289167   |
| TCGA-DD-AAE7 | 175 | 3.5  | 0.544068044 |
| TCGA-DD-AACQ | 176 | 3.52 | 0.546542663 |
| TCGA-DD-AADF | 180 | 3.6  | 0.556302501 |
| TCGA-MI-A75G | 188 | 3.76 | 0.575187845 |

|              |      |       |             |
|--------------|------|-------|-------------|
| TCGA-ED-A7PZ | 221  | 4.42  | 0.645422269 |
| TCGA-DD-AACL | 251  | 5.02  | 0.700703717 |
| TCGA-CC-A7IK | 259  | 5.18  | 0.71432976  |
| TCGA-DD-A3A9 | 274  | 5.48  | 0.738780558 |
| TCGA-DD-AACI | 277  | 5.54  | 0.743509765 |
| TCGA-WQ-A9G7 | 294  | 5.88  | 0.769377326 |
| TCGA-DD-A1EE | 384  | 7.68  | 0.88536122  |
| TCGA-DD-AAC8 | 480  | 9.6   | 0.982271233 |
| TCGA-CC-A7IH | 594  | 11.88 | 1.074816441 |
| TCGA-4R-AA8I | 802  | 16.04 | 1.205204364 |
| TCGA-UB-A7MB | 1251 | 25.02 | 1.398287305 |

---

**Table S9. Top 30 gain or loss local segments in TCHA-LIHC patients.**

|              | TCGA-2V-A95S | TCGA-2Y-A9GS | TCGA-2Y-A9GT | TCGA-2Y-A9GU | TCGA-2Y-A9GV | TCGA-2Y-A9GW | TCGA-2Y-A9GX |
|--------------|--------------|--------------|--------------|--------------|--------------|--------------|--------------|
| 1q21.3-Amp   | 2            | 0            | 0            | 2            | 0            | 2            | 1            |
| 1q42.2-Amp   | 1            | 1            | 0            | 2            | 0            | 2            | 1            |
| 8q24.21-Amp  | 2            | 0            | 0            | 0            | 0            | 2            | 1            |
| 6p21.1-Amp   | 0            | 1            | 0            | 0            | 1            | 0            | 0            |
| 5p15.33-Amp  | 0            | 0            | 0            | 0            | 0            | 1            | 0            |
| 6p25.2-Amp   | 1            | 1            | 0            | 0            | 1            | 0            | 0            |
| 17q25.3-Amp  | 1            | 0            | 0            | 0            | 0            | 0            | 0            |
| 5q35.3-Amp   | 1            | 0            | 0            | 0            | 0            | 1            | 0            |
| 20q13.33-Amp | 0            | 1            | 0            | 0            | 0            | 0            | 1            |
| 20q13.13-Amp | 0            | 1            | 0            | 0            | 0            | 0            | 1            |
| 7q31.2-Amp   | 0            | 1            | 0            | 1            | 0            | 1            | 0            |
| 6q12-Amp     | 1            | 1            | 0            | 0            | 0            | 0            | 0            |
| 19q13.11-Amp | 0            | 0            | 0            | 1            | 0            | 1            | 0            |
| Xq28-Amp     | 1            | 0            | 1            | 0            | 0            | 1            | 0            |
| 3q26.31-Amp  | 0            | 1            | 0            | 0            | 0            | 0            | 0            |
| 8p23.2-Del   | 1            | 1            | 0            | 1            | 0            | 1            | 1            |
| 8p12-Del     | 1            | 1            | 0            | 1            | 0            | 1            | 1            |
| 17p13.1-Del  | 0            | 1            | 1            | 0            | 1            | 0            | 0            |
| 13q14.2-Del  | 0            | 1            | 0            | 0            | 1            | 0            | 0            |
| 4q21.3-Del   | 0            | 1            | 0            | 0            | 1            | 0            | 0            |
| 4q24-Del     | 0            | 1            | 0            | 0            | 0            | 0            | 0            |
| 4q35.1-Del   | 0            | 1            | 0            | 0            | 0            | 0            | 0            |
| 1p36.31-Del  | 0            | 0            | 0            | 0            | 0            | 0            | 1            |
| 16q23.1-Del  | 0            | 0            | 0            | 0            | 0            | 0            | 0            |
| 9p21.3-Del   | 0            | 1            | 0            | 1            | 1            | 0            | 0            |
| 1p36.11-Del  | 0            | 0            | 0            | 0            | 0            | 0            | 1            |
| 6q27-Del     | 0            | 0            | 0            | 0            | 0            | 0            | 0            |
| 14q32.33-Del | 0            | 1            | 0            | 0            | 0            | 0            | 1            |
| 14q23.3-Del  | 0            | 1            | 0            | 0            | 0            | 0            | 1            |
| 9q31.3-Del   | 0            | 1            | 0            | 1            | 0            | 0            | 0            |

| TCGA-2Y-A9GY | TCGA-2Y-A9GZ | TCGA-2Y-A9H0 | TCGA-2Y-A9H1 | TCGA-2Y-A9H2 | TCGA-2Y-A9H3 | TCGA-2Y-A9H4 | TCGA-2Y-A9H5 |
|--------------|--------------|--------------|--------------|--------------|--------------|--------------|--------------|
| 1            | 1            | 1            | 1            | 1            | 1            | 0            | 1            |
| 0            | 1            | 1            | 1            | 1            | 1            | 0            | 1            |
| 1            | 0            | 0            | 2            | 2            | 0            | 1            | 1            |
| 1            | 1            | 0            | 0            | 1            | 1            | 0            | 1            |
| 1            | 1            | 1            | 1            | 1            | 1            | 1            | 0            |
| 1            | 2            | 0            | 0            | 1            | 1            | 0            | 1            |
| 2            | 2            | 1            | 2            | 1            | 0            | 0            | 0            |
| 0            | 1            | 0            | 1            | 0            | 1            | 1            | 0            |
| 1            | 1            | 0            | 0            | 0            | 0            | 0            | 0            |
| 1            | 1            | 1            | 0            | 0            | 0            | 0            | 0            |
| 1            | 1            | 0            | 0            | 1            | 2            | 0            | 0            |
| 1            | 1            | 0            | 0            | 0            | 1            | 0            | 1            |
| 1            | 0            | 0            | 0            | 0            | 1            | 0            | 0            |
| 0            | 1            | 0            | 1            | 1            | 0            | 1            | 0            |
| 0            | 1            | 2            | 0            | 0            | 0            | 2            | 0            |
| 1            | 0            | 0            | 1            | 1            | 1            | 1            | 1            |
| 0            | 1            | 0            | 1            | 1            | 1            | 1            | 1            |
| 1            | 1            | 1            | 0            | 1            | 0            | 1            | 1            |
| 1            | 1            | 1            | 0            | 1            | 0            | 1            | 1            |
| 1            | 1            | 1            | 0            | 1            | 1            | 1            | 1            |
| 1            | 0            | 1            | 0            | 1            | 1            | 0            | 0            |
| 1            | 1            | 1            | 0            | 1            | 1            | 0            | 0            |
| 1            | 0            | 1            | 0            | 1            | 1            | 0            | 0            |
| 0            | 0            | 0            | 0            | 1            | 1            | 0            | 1            |
| 1            | 0            | 0            | 0            | 1            | 1            | 0            | 1            |
| 0            | 0            | 0            | 0            | 1            | 1            | 0            | 1            |
| 0            | 0            | 0            | 0            | 1            | 1            | 0            | 1            |
| 0            | 1            | 1            | 0            | 1            | 0            | 0            | 1            |
| 1            | 0            | 0            | 1            | 1            | 1            | 1            | 0            |
| 1            | 0            | 0            | 1            | 1            | 1            | 1            | 0            |
| 0            | 0            | 0            | 0            | 1            | 1            | 0            | 1            |

| TCGA-2Y-A9H6 | TCGA-2Y-A9H7 | TCGA-2Y-A9H8 | TCGA-2Y-A9H9 | TCGA-2Y-A9HA | TCGA-2Y-A9HB | TCGA-3K-AAZ8 | TCGA-4R-AA8I |
|--------------|--------------|--------------|--------------|--------------|--------------|--------------|--------------|
| 2            | 1            | 1            | 2            | 1            | 0            | 1            | 2            |
| 1            | 1            | 2            | 1            | 0            | 2            | 1            | 0            |
| 0            | 0            | 0            | 0            | 2            | 0            | 1            | 0            |
| 0            | 0            | 1            | 1            | 1            | 0            | 2            | 2            |
| 0            | 0            | 2            | 1            | 1            | 1            | 1            | 0            |
| 0            | 0            | 1            | 0            | 1            | 0            | 2            | 0            |
| 0            | 0            | 0            | 1            | 0            | 0            | 1            | 0            |
| 1            | 0            | 0            | 1            | 1            | 1            | 1            | 0            |
| 0            | 0            | 0            | 1            | 1            | 0            | 0            | 0            |
| 0            | 0            | 2            | 1            | 1            | 0            | 0            | 0            |
| 0            | 0            | 0            | 1            | 0            | 0            | 1            | 0            |
| 0            | 0            | 1            | 0            | 1            | 0            | 1            | 0            |
| 0            | 0            | 0            | 0            | 0            | 0            | 1            | 0            |
| 0            | 0            | 0            | 0            | 0            | 0            | 0            | 0            |
| 0            | 0            | 1            | 0            | 0            | 0            | 1            | 0            |
| 1            | 1            | 0            | 1            | 1            | 1            | 1            | 0            |
| 1            | 1            | 0            | 1            | 1            | 1            | 1            | 0            |
| 0            | 0            | 1            | 1            | 1            | 0            | 0            | 1            |
| 0            | 0            | 1            | 0            | 1            | 0            | 1            | 1            |
| 0            | 0            | 1            | 0            | 0            | 0            | 1            | 0            |
| 0            | 0            | 1            | 0            | 1            | 0            | 1            | 0            |
| 0            | 0            | 1            | 0            | 1            | 0            | 1            | 0            |
| 1            | 1            | 0            | 0            | 0            | 0            | 1            | 0            |
| 0            | 1            | 1            | 0            | 1            | 0            | 0            | 0            |
| 1            | 1            | 1            | 0            | 0            | 0            | 1            | 0            |
| 1            | 1            | 0            | 0            | 0            | 0            | 1            | 0            |
| 1            | 1            | 1            | 0            | 1            | 0            | 0            | 1            |
| 1            | 0            | 0            | 1            | 0            | 0            | 0            | 0            |
| 0            | 0            | 0            | 1            | 0            | 0            | 0            | 0            |
| 1            | 0            | 1            | 1            | 1            | 0            | 1            | 0            |



| TCGA-5C-A9VG | TCGA-5C-A9VH | TCGA-5C-AAPD | TCGA-5R-AA1C | TCGA-5R-AA1D | TCGA-5R-AAAM | TCGA-BC-A10Q | TCGA-BC-A10R |
|--------------|--------------|--------------|--------------|--------------|--------------|--------------|--------------|
| 2            | 2            | 1            | 2            | 0            | 0            | 1            | 1            |
| 2            | 2            | 1            | 2            | 0            | 0            | 1            | 2            |
| 1            | 2            | 0            | 1            | 1            | 1            | 0            | 0            |
| 1            | 0            | 0            | 1            | 0            | 1            | 0            | 0            |
| 1            | 0            | 0            | 0            | 0            | 0            | 1            | 1            |
| 0            | 0            | 0            | 1            | 0            | 0            | 0            | 1            |
| 0            | 0            | 0            | 0            | 0            | 1            | 1            | 0            |
| 1            | 0            | 0            | 0            | 0            | 0            | 1            | 0            |
| 1            | 1            | 0            | 0            | 0            | 1            | 1            | 1            |
| 0            | 1            | 0            | 0            | 0            | 1            | 1            | 1            |
| 1            | 1            | 0            | 0            | 0            | 0            | 1            | 1            |
| 1            | 0            | 0            | 0            | 0            | 0            | 1            | 0            |
| 0            | 0            | 0            | 0            | 0            | 0            | 1            | 1            |
| 0            | 0            | 0            | 1            | 0            | 0            | 0            | 0            |
| 0            | 0            | 1            | 1            | 0            | 0            | 0            | 1            |
| 0            | 1            | 0            | 1            | 0            | 1            | 0            | 1            |
| 0            | 1            | 0            | 1            | 0            | 1            | 1            | 1            |
| 0            | 0            | 1            | 0            | 0            | 1            | 0            | 1            |
| 1            | 1            | 0            | 0            | 0            | 0            | 1            | 1            |
| 1            | 1            | 1            | 0            | 0            | 0            | 0            | 0            |
| 1            | 1            | 1            | 0            | 0            | 0            | 0            | 0            |
| 1            | 1            | 1            | 0            | 0            | 0            | 0            | 1            |
| 1            | 1            | 0            | 0            | 0            | 0            | 1            | 0            |
| 1            | 0            | 1            | 0            | 0            | 0            | 0            | 1            |
| 1            | 1            | 0            | 0            | 0            | 0            | 1            | 1            |
| 1            | 1            | 0            | 0            | 0            | 0            | 1            | 0            |
| 0            | 0            | 0            | 1            | 0            | 1            | 1            | 0            |
| 1            | 0            | 1            | 0            | 0            | 0            | 1            | 1            |
| 1            | 0            | 1            | 0            | 0            | 0            | 1            | 0            |
| 1            | 1            | 0            | 0            | 0            | 0            | 1            | 1            |

| TCGA-BC-A10T | TCGA-BC-A10U | TCGA-BC-A10W | TCGA-BC-A10Y | TCGA-BC-A10Z | TCGA-BC-A216 | TCGA-BC-A217 | TCGA-BC-A3KF |
|--------------|--------------|--------------|--------------|--------------|--------------|--------------|--------------|
| 0            | 2            | 2            | 1            | 1            | 1            | 2            | 0            |
| 2            | 2            | 0            | 1            | 0            | 2            | 2            | 0            |
| 1            | 1            | 2            | 0            | 0            | 0            | 0            | 1            |
| 2            | 2            | 0            | 2            | 1            | 2            | 1            | 1            |
| 0            | 0            | 1            | 0            | 2            | 1            | 1            | 0            |
| 0            | 2            | 0            | 0            | 0            | 1            | 1            | 0            |
| 1            | 1            | 1            | 1            | 1            | 1            | 2            | 0            |
| 1            | 0            | 1            | 0            | 0            | 2            | 1            | 0            |
| 0            | 0            | 0            | 1            | 0            | 0            | 1            | 1            |
| 1            | 0            | 0            | 1            | 0            | 0            | 1            | 1            |
| 0            | 1            | 0            | 0            | 0            | 0            | 0            | 1            |
| 2            | 0            | 0            | 0            | 0            | 0            | 1            | 1            |
| 2            | 0            | 0            | 2            | 0            | 0            | 2            | 0            |
| 0            | 2            | 0            | 0            | 0            | 0            | 0            | 0            |
| 2            | 0            | 0            | 1            | 2            | 0            | 2            | 0            |
| 1            | 1            | 0            | 0            | 0            | 1            | 1            | 1            |
| 1            | 0            | 0            | 0            | 0            | 0            | 1            | 1            |
| 1            | 1            | 0            | 1            | 1            | 1            | 1            | 1            |
| 1            | 0            | 1            | 1            | 1            | 0            | 1            | 1            |
| 1            | 1            | 0            | 1            | 1            | 0            | 1            | 1            |
| 1            | 1            | 0            | 1            | 1            | 0            | 1            | 1            |
| 1            | 0            | 0            | 1            | 1            | 0            | 1            | 1            |
| 1            | 0            | 1            | 0            | 1            | 0            | 1            | 1            |
| 0            | 0            | 1            | 1            | 1            | 1            | 1            | 0            |
| 0            | 1            | 0            | 0            | 0            | 0            | 0            | 1            |
| 1            | 0            | 1            | 0            | 0            | 0            | 0            | 0            |
| 0            | 0            | 0            | 0            | 0            | 0            | 0            | 1            |
| 1            | 0            | 0            | 0            | 1            | 0            | 1            | 1            |
| 0            | 0            | 0            | 0            | 0            | 1            | 0            | 1            |
| 0            | 1            | 0            | 0            | 0            | 0            | 1            | 0            |

| TCGA-BC-A5W4 | TCGA-BC-A69H | TCGA-BC-A8YO | TCGA-BD-A2L6 | TCGA-BD-A3EP | TCGA-BD-A3ER | TCGA-BW-A5NO |
|--------------|--------------|--------------|--------------|--------------|--------------|--------------|
| 0            | 1            | 2            | 0            | 0            | 1            | 2            |
| 2            | 1            | 0            | 0            | 0            | 2            | 1            |
| 0            | 2            | 0            | 0            | 1            | 1            | 0            |
| 0            | 1            | 0            | 2            | 1            | 0            | 2            |
| 0            | 0            | 2            | 0            | 1            | 0            | 2            |
| 0            | 1            | 0            | 1            | 1            | 0            | 1            |
| 0            | 1            | 0            | 0            | 1            | 0            | 2            |
| 0            | 0            | 0            | 0            | 0            | 0            | 0            |
| 0            | 1            | 0            | 1            | 1            | 0            | 2            |
| 0            | 1            | 0            | 2            | 1            | 0            | 2            |
| 1            | 2            | 0            | 0            | 1            | 1            | 1            |
| 0            | 1            | 1            | 1            | 1            | 0            | 1            |
| 0            | 0            | 0            | 0            | 1            | 0            | 2            |
| 0            | 0            | 0            | 0            | 0            | 0            | 1            |
| 1            | 1            | 0            | 0            | 2            | 0            | 2            |
| 0            | 1            | 0            | 0            | 1            | 0            | 1            |
| 0            | 1            | 0            | 0            | 1            | 0            | 1            |
| 1            | 1            | 1            | 1            | 1            | 0            | 1            |
| 1            | 1            | 1            | 0            | 0            | 0            | 1            |
| 1            | 1            | 1            | 1            | 1            | 0            | 1            |
| 1            | 1            | 0            | 1            | 1            | 0            | 1            |
| 1            | 1            | 0            | 0            | 1            | 0            | 1            |
| 1            | 1            | 0            | 0            | 1            | 0            | 1            |
| 0            | 1            | 0            | 0            | 0            | 1            | 0            |
| 0            | 1            | 1            | 0            | 1            | 0            | 1            |
| 1            | 1            | 0            | 0            | 0            | 0            | 0            |
| 0            | 1            | 0            | 0            | 0            | 1            | 0            |
| 1            | 0            | 0            | 0            | 0            | 1            | 0            |
| 0            | 0            | 0            | 0            | 0            | 0            | 0            |
| 0            | 0            | 0            | 0            | 1            | 0            | 0            |
| 1            | 1            | 0            | 0            | 0            | 0            | 0            |

| TCGA-BW-A5NP | TCGA-BW-A5NQ | TCGA-CC-5258 | TCGA-CC-5260 | TCGA-CC-5262 | TCGA-CC-5263 | TCGA-CC-5264 | TCGA-CC-A1HT |
|--------------|--------------|--------------|--------------|--------------|--------------|--------------|--------------|
| 2            | 1            | 1            | 0            | 1            | 1            | 2            | 1            |
| 2            | 1            | 0            | 0            | 1            | 0            | 2            | 0            |
| 1            | 1            | 2            | 0            | 1            | 0            | 1            | 1            |
| 2            | 1            | 0            | 0            | 0            | 2            | 0            | 0            |
| 2            | 1            | 1            | 0            | 0            | 1            | 2            | 1            |
| 2            | 1            | 0            | 0            | 0            | 1            | 0            | 0            |
| 0            | 1            | 0            | 1            | 0            | 1            | 1            | 0            |
| 1            | 1            | 0            | 0            | 0            | 0            | 0            | 1            |
| 2            | 0            | 0            | 0            | 0            | 0            | 1            | 0            |
| 0            | 0            | 0            | 0            | 0            | 0            | 1            | 1            |
| 1            | 1            | 0            | 1            | 0            | 0            | 2            | 0            |
| 0            | 1            | 0            | 0            | 0            | 1            | 0            | 0            |
| 1            | 1            | 0            | 0            | 0            | 0            | 0            | 0            |
| 0            | 0            | 0            | 0            | 0            | 0            | 1            | 0            |
| 0            | 1            | 0            | 0            | 0            | 0            | 0            | 0            |
| 1            | 0            | 1            | 0            | 1            | 1            | 0            | 1            |
| 1            | 0            | 1            | 0            | 1            | 1            | 0            | 1            |
| 1            | 1            | 1            | 1            | 1            | 1            | 1            | 1            |
| 0            | 1            | 1            | 1            | 1            | 1            | 1            | 1            |
| 1            | 1            | 1            | 0            | 0            | 1            | 1            | 0            |
| 1            | 1            | 1            | 0            | 0            | 1            | 1            | 0            |
| 1            | 1            | 1            | 0            | 0            | 0            | 1            | 1            |
| 1            | 1            | 1            | 0            | 0            | 1            | 1            | 0            |
| 1            | 0            | 0            | 1            | 1            | 1            | 0            | 0            |
| 1            | 1            | 1            | 1            | 1            | 1            | 1            | 0            |
| 0            | 1            | 1            | 0            | 0            | 1            | 0            | 1            |
| 1            | 0            | 1            | 1            | 0            | 0            | 0            | 0            |
| 1            | 0            | 0            | 1            | 0            | 0            | 0            | 1            |
| 1            | 1            | 1            | 1            | 1            | 0            | 1            | 1            |
| 1            | 1            | 1            | 1            | 1            | 0            | 1            | 1            |
| 0            | 1            | 1            | 1            | 0            | 0            | 0            | 1            |

| TCGA-CC-A3M9 | TCGA-CC-A3MA | TCGA-CC-A3MB | TCGA-CC-A3MC | TCGA-CC-A5UC | TCGA-CC-A5UD | TCGA-CC-A5UE |
|--------------|--------------|--------------|--------------|--------------|--------------|--------------|
| 0            | 2            | 1            | 2            | 1            | 1            | 1            |
| 1            | 1            | 0            | 2            | 1            | 0            | 1            |
| 1            | 2            | 1            | 2            | 1            | 2            | 2            |
| 0            | 0            | 1            | 1            | 0            | 0            | 1            |
| 1            | 0            | 1            | 1            | 1            | 1            | 0            |
| 0            | 0            | 2            | 1            | 0            | 0            | 1            |
| 0            | 0            | 1            | 1            | 1            | 0            | 2            |
| 0            | 0            | 1            | 1            | 1            | 0            | 0            |
| 1            | 0            | 1            | 1            | 1            | 0            | 1            |
| 1            | 0            | 1            | 1            | 1            | 0            | 1            |
| 1            | 0            | 1            | 0            | 0            | 0            | 1            |
| 0            | 0            | 1            | 1            | 0            | 0            | 1            |
| 1            | 0            | 0            | 0            | 0            | 0            | 0            |
| 0            | 2            | 0            | 0            | 0            | 0            | 1            |
| 0            | 1            | 0            | 0            | 0            | 0            | 0            |
| 1            | 0            | 0            | 1            | 0            | 0            | 0            |
| 1            | 1            | 0            | 0            | 0            | 0            | 0            |
| 0            | 1            | 1            | 1            | 1            | 1            | 1            |
| 1            | 1            | 0            | 1            | 1            | 0            | 1            |
| 1            | 1            | 1            | 1            | 1            | 1            | 1            |
| 1            | 0            | 1            | 1            | 0            | 1            | 1            |
| 1            | 0            | 1            | 1            | 0            | 1            | 1            |
| 1            | 1            | 1            | 1            | 0            | 1            | 0            |
| 0            | 1            | 1            | 0            | 1            | 1            | 0            |
| 1            | 0            | 1            | 1            | 1            | 1            | 1            |
| 0            | 1            | 1            | 0            | 1            | 1            | 0            |
| 1            | 1            | 0            | 1            | 0            | 1            | 1            |
| 0            | 1            | 1            | 1            | 0            | 0            | 1            |
| 0            | 1            | 1            | 1            | 0            | 0            | 1            |
| 1            | 0            | 1            | 1            | 0            | 0            | 1            |

| TCGA-CC-A7IE | TCGA-CC-A7IF | TCGA-CC-A7IG | TCGA-CC-A7IH | TCGA-CC-A7II | TCGA-CC-A7IJ | TCGA-CC-A7IK | TCGA-CC-A7IL |
|--------------|--------------|--------------|--------------|--------------|--------------|--------------|--------------|
| 1            | 1            | 2            | 2            | 0            | 0            | 2            | 2            |
| 1            | 1            | 2            | 2            | 0            | 0            | 2            | 2            |
| 2            | 2            | 2            | 2            | 2            | 1            | 2            | 1            |
| 1            | 0            | 2            | 2            | 1            | 0            | 1            | 2            |
| 0            | 0            | 1            | 0            | 1            | 1            | 0            | 2            |
| 2            | 0            | 2            | 2            | 1            | 0            | 1            | 2            |
| 1            | 2            | 1            | 0            | 0            | 1            | 1            | 2            |
| 0            | 0            | 1            | 0            | 0            | 0            | 0            | 1            |
| 1            | 0            | 0            | 0            | 2            | 0            | 0            | 1            |
| 1            | 0            | 0            | 0            | 2            | 0            | 0            | 1            |
| 0            | 0            | 0            | 0            | 1            | 1            | 0            | 0            |
| 1            | 0            | 2            | 0            | 1            | 1            | 1            | 0            |
| 0            | 0            | 0            | 0            | 2            | 0            | 0            | 0            |
| 1            | 0            | 1            | 1            | 0            | 0            | 0            | 0            |
| 1            | 0            | 1            | 0            | 0            | 1            | 1            | 0            |
| 1            | 1            | 1            | 1            | 1            | 1            | 0            | 1            |
| 1            | 1            | 1            | 1            | 0            | 1            | 0            | 1            |
| 0            | 1            | 1            | 0            | 1            | 0            | 1            | 1            |
| 0            | 1            | 1            | 0            | 1            | 1            | 1            | 1            |
| 1            | 1            | 1            | 0            | 1            | 1            | 1            | 1            |
| 1            | 1            | 1            | 0            | 1            | 1            | 1            | 1            |
| 1            | 1            | 1            | 0            | 1            | 1            | 1            | 1            |
| 1            | 1            | 1            | 0            | 0            | 1            | 0            | 1            |
| 1            | 1            | 1            | 0            | 0            | 0            | 0            | 0            |
| 1            | 1            | 1            | 0            | 0            | 1            | 1            | 1            |
| 1            | 1            | 1            | 0            | 0            | 1            | 0            | 1            |
| 0            | 1            | 0            | 0            | 0            | 0            | 0            | 1            |
| 0            | 0            | 0            | 0            | 1            | 1            | 1            | 0            |
| 1            | 0            | 1            | 0            | 1            | 1            | 1            | 0            |
| 0            | 1            | 0            | 0            | 0            | 1            | 0            | 1            |

| TCGA-CC-A8HT | TCGA-CC-A8HU | TCGA-CC-A8HV | TCGA-CC-A9FS | TCGA-CC-A9FU | TCGA-CC-A9FV | TCGA-CC-A9FW | TCGA-DD-A113 |
|--------------|--------------|--------------|--------------|--------------|--------------|--------------|--------------|
| 1            | 2            | 1            | 0            | 2            | 0            | 1            | 2            |
| 1            | 2            | 1            | 0            | 2            | 0            | 1            | 2            |
| 1            | 0            | 1            | 2            | 1            | 0            | 1            | 1            |
| 0            | 1            | 1            | 0            | 1            | 0            | 0            | 0            |
| 0            | 2            | 0            | 0            | 0            | 0            | 1            | 0            |
| 0            | 1            | 0            | 0            | 1            | 0            | 0            | 0            |
| 1            | 1            | 0            | 0            | 1            | 0            | 1            | 0            |
| 0            | 1            | 0            | 0            | 0            | 0            | 2            | 0            |
| 0            | 2            | 1            | 0            | 2            | 0            | 1            | 1            |
| 0            | 2            | 0            | 0            | 2            | 0            | 1            | 0            |
| 0            | 1            | 0            | 0            | 1            | 0            | 1            | 0            |
| 0            | 1            | 0            | 0            | 1            | 0            | 0            | 0            |
| 0            | 1            | 0            | 0            | 1            | 0            | 0            | 1            |
| 0            | 0            | 0            | 1            | 0            | 0            | 0            | 0            |
| 0            | 0            | 0            | 0            | 0            | 0            | 0            | 0            |
| 1            | 1            | 1            | 1            | 1            | 0            | 1            | 1            |
| 1            | 1            | 1            | 1            | 1            | 0            | 1            | 1            |
| 1            | 1            | 1            | 1            | 1            | 0            | 0            | 0            |
| 0            | 1            | 1            | 1            | 1            | 0            | 1            | 1            |
| 0            | 1            | 1            | 1            | 1            | 0            | 1            | 1            |
| 0            | 1            | 1            | 1            | 1            | 0            | 1            | 1            |
| 0            | 1            | 1            | 1            | 1            | 0            | 1            | 1            |
| 0            | 1            | 1            | 1            | 1            | 0            | 1            | 1            |
| 0            | 1            | 1            | 1            | 1            | 0            | 1            | 1            |
| 0            | 0            | 0            | 1            | 1            | 0            | 1            | 1            |
| 1            | 1            | 1            | 1            | 1            | 0            | 1            | 1            |
| 0            | 1            | 0            | 1            | 1            | 0            | 1            | 1            |
| 0            | 0            | 1            | 1            | 1            | 0            | 1            | 1            |
| 0            | 0            | 0            | 1            | 0            | 0            | 1            | 0            |
| 1            | 1            | 1            | 0            | 1            | 0            | 0            | 1            |
| 1            | 1            | 1            | 0            | 1            | 0            | 0            | 1            |
| 0            | 0            | 0            | 0            | 1            | 0            | 1            | 1            |

| TCGA-DD-A114 | TCGA-DD-A115 | TCGA-DD-A116 | TCGA-DD-A118 | TCGA-DD-A119 | TCGA-DD-A11A | TCGA-DD-A11B | TCGA-DD-A11C |
|--------------|--------------|--------------|--------------|--------------|--------------|--------------|--------------|
| 1            | 0            | 0            | 1            | 2            | 0            | 1            | 1            |
| 1            | 0            | 0            | 1            | 2            | 0            | 1            | 0            |
| 0            | 0            | 2            | 1            | 2            | 1            | 0            | 1            |
| 1            | 1            | 0            | 1            | 2            | 1            | 0            | 1            |
| 0            | 1            | 1            | 1            | 0            | 1            | 0            | 0            |
| 1            | 0            | 0            | 1            | 2            | 1            | 0            | 1            |
| 1            | 1            | 1            | 0            | 1            | 1            | 0            | 1            |
| 0            | 1            | 1            | 1            | 1            | 0            | 0            | 0            |
| 0            | 0            | 0            | 1            | 1            | 1            | 1            | 2            |
| 0            | 0            | 0            | 1            | 1            | 1            | 1            | 2            |
| 0            | 0            | 0            | 1            | 0            | 0            | 0            | 0            |
| 1            | 1            | 0            | 1            | 2            | 1            | 0            | 1            |
| 0            | 0            | 0            | 1            | 1            | 0            | 0            | 0            |
| 1            | 0            | 0            | 0            | 0            | 1            | 0            | 0            |
| 1            | 1            | 0            | 0            | 0            | 0            | 0            | 2            |
| 0            | 1            | 1            | 1            | 1            | 0            | 0            | 1            |
| 0            | 1            | 1            | 1            | 1            | 0            | 0            | 1            |
| 1            | 1            | 1            | 1            | 1            | 1            | 0            | 1            |
| 1            | 1            | 1            | 1            | 0            | 1            | 0            | 1            |
| 1            | 0            | 1            | 0            | 1            | 1            | 0            | 0            |
| 1            | 0            | 1            | 0            | 1            | 1            | 1            | 1            |
| 1            | 0            | 1            | 0            | 1            | 1            | 1            | 0            |
| 0            | 0            | 1            | 1            | 1            | 1            | 1            | 1            |
| 1            | 0            | 1            | 0            | 0            | 1            | 1            | 0            |
| 0            | 1            | 1            | 0            | 1            | 1            | 1            | 1            |
| 0            | 0            | 1            | 1            | 1            | 1            | 1            | 1            |
| 1            | 1            | 0            | 1            | 1            | 1            | 0            | 1            |
| 0            | 1            | 0            | 0            | 0            | 1            | 0            | 1            |
| 0            | 1            | 0            | 1            | 0            | 1            | 0            | 1            |
| 0            | 0            | 1            | 0            | 1            | 1            | 1            | 1            |





| TCGA-DD-A1EI | TCGA-DD-A1EJ | TCGA-DD-A1EK | TCGA-DD-A1EL | TCGA-DD-A39V | TCGA-DD-A39W | TCGA-DD-A39X | TCGA-DD-A39Z |
|--------------|--------------|--------------|--------------|--------------|--------------|--------------|--------------|
| 0            | 1            | 1            | 1            | 2            | 1            | 2            | 1            |
| 0            | 1            | 1            | 1            | 2            | 1            | 0            | 1            |
| 2            | 0            | 0            | 2            | 2            | 0            | 2            | 1            |
| 0            | 0            | 0            | 0            | 0            | 0            | 1            | 1            |
| 2            | 0            | 0            | 1            | 1            | 0            | 1            | 0            |
| 0            | 1            | 0            | 0            | 0            | 0            | 1            | 1            |
| 1            | 1            | 0            | 0            | 0            | 0            | 0            | 0            |
| 0            | 0            | 0            | 0            | 1            | 1            | 1            | 0            |
| 0            | 1            | 0            | 0            | 1            | 0            | 0            | 0            |
| 0            | 1            | 0            | 0            | 1            | 0            | 0            | 0            |
| 0            | 1            | 0            | 0            | 1            | 0            | 0            | 1            |
| 0            | 1            | 0            | 0            | 0            | 0            | 0            | 1            |
| 1            | 0            | 0            | 1            | 1            | 0            | 0            | 0            |
| 0            | 0            | 0            | 0            | 1            | 0            | 0            | 0            |
| 0            | 1            | 0            | 1            | 0            | 0            | 0            | 0            |
| 1            | 1            | 1            | 1            | 1            | 0            | 1            | 1            |
| 1            | 1            | 1            | 1            | 1            | 0            | 0            | 1            |
| 1            | 1            | 1            | 1            | 1            | 0            | 0            | 0            |
| 1            | 0            | 1            | 0            | 0            | 0            | 1            | 0            |
| 1            | 1            | 0            | 1            | 0            | 0            | 1            | 0            |
| 1            | 1            | 0            | 1            | 0            | 0            | 1            | 0            |
| 1            | 1            | 0            | 1            | 0            | 1            | 1            | 0            |
| 0            | 1            | 0            | 0            | 0            | 0            | 1            | 1            |
| 1            | 1            | 0            | 0            | 0            | 0            | 0            | 1            |
| 1            | 1            | 0            | 1            | 0            | 0            | 1            | 0            |
| 0            | 1            | 0            | 0            | 1            | 0            | 1            | 0            |
| 1            | 1            | 1            | 0            | 0            | 0            | 1            | 1            |
| 0            | 1            | 0            | 1            | 0            | 0            | 1            | 0            |
| 1            | 1            | 0            | 1            | 0            | 0            | 1            | 0            |
| 1            | 1            | 1            | 0            | 0            | 0            | 1            | 0            |

| TCGA-DD-A3A2 | TCGA-DD-A3A3 | TCGA-DD-A3A4 | TCGA-DD-A3A5 | TCGA-DD-A3A6 | TCGA-DD-A3A7 | TCGA-DD-A3A8 | TCGA-DD-A3A9 |
|--------------|--------------|--------------|--------------|--------------|--------------|--------------|--------------|
| 0            | 2            | 0            | 0            | 0            | 2            | 2            | 2            |
| 0            | 2            | 0            | 0            | 0            | 2            | 2            | 2            |
| 0            | 2            | 0            | 0            | 0            | 2            | 2            | 0            |
| 0            | 0            | 0            | 2            | 0            | 0            | 1            | 1            |
| 0            | 1            | 0            | 1            | 0            | 2            | 1            | 0            |
| 0            | 0            | 0            | 1            | 0            | 1            | 1            | 1            |
| 0            | 1            | 1            | 0            | 0            | 2            | 0            | 1            |
| 0            | 1            | 0            | 1            | 0            | 2            | 1            | 0            |
| 0            | 0            | 0            | 1            | 0            | 1            | 0            | 1            |
| 0            | 0            | 0            | 2            | 0            | 2            | 0            | 1            |
| 1            | 0            | 0            | 0            | 0            | 0            | 0            | 0            |
| 0            | 0            | 0            | 1            | 0            | 1            | 1            | 1            |
| 0            | 0            | 0            | 0            | 0            | 2            | 0            | 1            |
| 0            | 1            | 0            | 0            | 0            | 1            | 0            | 0            |
| 0            | 0            | 0            | 2            | 0            | 0            | 0            | 0            |
| 0            | 1            | 0            | 0            | 0            | 1            | 1            | 1            |
| 0            | 1            | 0            | 1            | 0            | 1            | 1            | 1            |
| 0            | 1            | 1            | 1            | 0            | 1            | 0            | 1            |
| 0            | 0            | 0            | 1            | 0            | 0            | 0            | 1            |
| 0            | 0            | 0            | 1            | 0            | 0            | 0            | 1            |
| 0            | 0            | 0            | 1            | 0            | 0            | 0            | 1            |
| 1            | 0            | 0            | 0            | 0            | 0            | 0            | 1            |
| 0            | 0            | 0            | 0            | 0            | 0            | 0            | 1            |
| 0            | 0            | 0            | 0            | 0            | 0            | 1            | 1            |
| 0            | 0            | 0            | 0            | 0            | 0            | 0            | 1            |
| 0            | 0            | 0            | 0            | 0            | 0            | 0            | 1            |
| 0            | 0            | 0            | 0            | 0            | 0            | 1            | 0            |
| 0            | 0            | 0            | 0            | 0            | 1            | 0            | 1            |
| 0            | 0            | 0            | 0            | 0            | 1            | 0            | 1            |
| 0            | 0            | 0            | 0            | 0            | 0            | 0            | 1            |

| TCGA-DD-A4NA | TCGA-DD-A4NB | TCGA-DD-A4ND | TCGA-DD-A4NF | TCGA-DD-A4NH | TCGA-DD-A4NI | TCGA-DD-A4NJ |
|--------------|--------------|--------------|--------------|--------------|--------------|--------------|
| 0            | 0            | 0            | 2            | 1            | 1            | 1            |
| 1            | 1            | 0            | 2            | 1            | 1            | 1            |
| 0            | 0            | 1            | 1            | 0            | 1            | 1            |
| 0            | 0            | 0            | 0            | 1            | 0            | 0            |
| 0            | 0            | 1            | 0            | 0            | 0            | 1            |
| 0            | 0            | 0            | 0            | 1            | 0            | 1            |
| 0            | 0            | 0            | 0            | 1            | 1            | 1            |
| 0            | 0            | 1            | 0            | 0            | 0            | 0            |
| 0            | 0            | 1            | 0            | 0            | 0            | 0            |
| 0            | 0            | 1            | 0            | 0            | 0            | 0            |
| 1            | 0            | 0            | 0            | 0            | 1            | 0            |
| 1            | 0            | 0            | 0            | 1            | 0            | 0            |
| 0            | 0            | 1            | 0            | 0            | 0            | 0            |
| 0            | 0            | 0            | 1            | 0            | 0            | 0            |
| 0            | 0            | 0            | 0            | 0            | 1            | 0            |
| 1            | 0            | 1            | 1            | 1            | 1            | 1            |
| 1            | 0            | 1            | 0            | 1            | 0            | 1            |
| 1            | 1            | 0            | 0            | 1            | 1            | 1            |
| 1            | 0            | 0            | 0            | 1            | 0            | 1            |
| 0            | 0            | 1            | 0            | 1            | 1            | 1            |
| 0            | 0            | 1            | 0            | 1            | 1            | 1            |
| 0            | 0            | 0            | 0            | 1            | 1            | 1            |
| 0            | 0            | 0            | 0            | 1            | 1            | 1            |
| 0            | 0            | 1            | 0            | 1            | 1            | 1            |
| 0            | 0            | 1            | 0            | 0            | 1            | 0            |
| 1            | 0            | 0            | 0            | 1            | 1            | 1            |
| 1            | 0            | 0            | 0            | 1            | 0            | 1            |
| 0            | 1            | 0            | 0            | 1            | 1            | 1            |
| 0            | 1            | 0            | 0            | 1            | 1            | 0            |
| 1            | 0            | 0            | 0            | 0            | 1            | 1            |

| TCGA-DD-A4NK | TCGA-DD-A4NL | TCGA-DD-A4NN | TCGA-DD-A4NO | TCGA-DD-A4NP | TCGA-DD-A4NQ | TCGA-DD-A4NR |
|--------------|--------------|--------------|--------------|--------------|--------------|--------------|
| 1            | 0            | 2            | 2            | 0            | 0            | 1            |
| 1            | 0            | 2            | 2            | 0            | 1            | 1            |
| 1            | 0            | 1            | 2            | 0            | 1            | 2            |
| 1            | 0            | 1            | 0            | 0            | 0            | 0            |
| 1            | 0            | 0            | 1            | 0            | 0            | 0            |
| 1            | 0            | 1            | 0            | 0            | 0            | 0            |
| 0            | 0            | 0            | 1            | 1            | 0            | 0            |
| 1            | 0            | 0            | 1            | 0            | 0            | 1            |
| 0            | 0            | 1            | 2            | 0            | 0            | 1            |
| 0            | 0            | 1            | 2            | 0            | 0            | 1            |
| 1            | 0            | 0            | 0            | 0            | 1            | 0            |
| 1            | 0            | 1            | 0            | 0            | 0            | 0            |
| 0            | 0            | 1            | 1            | 0            | 1            | 0            |
| 1            | 0            | 0            | 0            | 0            | 0            | 0            |
| 0            | 0            | 0            | 0            | 0            | 0            | 0            |
| 1            | 0            | 1            | 1            | 0            | 0            | 1            |
| 1            | 0            | 1            | 1            | 0            | 0            | 1            |
| 0            | 0            | 0            | 1            | 0            | 1            | 0            |
| 0            | 0            | 1            | 1            | 0            | 1            | 1            |
| 0            | 0            | 1            | 1            | 0            | 1            | 0            |
| 0            | 0            | 1            | 1            | 0            | 1            | 0            |
| 0            | 0            | 1            | 1            | 0            | 0            | 0            |
| 0            | 0            | 1            | 1            | 0            | 0            | 0            |
| 0            | 0            | 1            | 1            | 0            | 0            | 0            |
| 0            | 0            | 0            | 1            | 0            | 0            | 0            |
| 0            | 0            | 1            | 1            | 0            | 0            | 0            |
| 1            | 0            | 1            | 0            | 0            | 0            | 0            |
| 0            | 0            | 0            | 1            | 0            | 1            | 0            |
| 0            | 0            | 0            | 1            | 0            | 1            | 0            |
| 0            | 0            | 1            | 1            | 0            | 0            | 0            |

| TCGA-DD-A4NS | TCGA-DD-A4NV | TCGA-DD-A73A | TCGA-DD-A73B | TCGA-DD-A73C | TCGA-DD-A73D | TCGA-DD-A73E | TCGA-DD-A73F |
|--------------|--------------|--------------|--------------|--------------|--------------|--------------|--------------|
| 0            | 2            | 0            | 1            | 0            | 2            | 0            | 1            |
| 0            | 1            | 0            | 0            | 0            | 2            | 1            | 1            |
| 1            | 0            | 2            | 0            | 0            | 2            | 0            | 0            |
| 1            | 0            | 0            | 0            | 0            | 2            | 2            | 1            |
| 0            | 1            | 0            | 0            | 1            | 0            | 0            | 0            |
| 1            | 0            | 0            | 0            | 0            | 2            | 2            | 0            |
| 0            | 0            | 2            | 0            | 0            | 2            | 1            | 2            |
| 0            | 1            | 1            | 0            | 0            | 0            | 0            | 0            |
| 0            | 1            | 0            | 0            | 0            | 0            | 0            | 1            |
| 0            | 1            | 0            | 0            | 0            | 0            | 0            | 0            |
| 0            | 2            | 0            | 0            | 1            | 0            | 2            | 0            |
| 1            | 0            | 0            | 0            | 0            | 0            | 1            | 0            |
| 0            | 1            | 0            | 0            | 0            | 0            | 0            | 1            |
| 0            | 1            | 0            | 0            | 0            | 1            | 0            | 0            |
| 0            | 1            | 0            | 0            | 0            | 0            | 1            | 0            |
| 1            | 1            | 1            | 0            | 1            | 1            | 1            | 1            |
| 1            | 1            | 1            | 1            | 1            | 1            | 1            | 1            |
| 0            | 0            | 1            | 1            | 0            | 0            | 1            | 0            |
| 0            | 0            | 0            | 0            | 0            | 0            | 1            | 1            |
| 0            | 0            | 0            | 1            | 0            | 0            | 0            | 0            |
| 0            | 0            | 0            | 1            | 0            | 0            | 0            | 0            |
| 0            | 0            | 0            | 1            | 0            | 0            | 0            | 0            |
| 0            | 0            | 1            | 1            | 0            | 0            | 0            | 1            |
| 0            | 0            | 0            | 1            | 0            | 0            | 0            | 1            |
| 0            | 0            | 0            | 0            | 0            | 0            | 0            | 1            |
| 0            | 0            | 0            | 1            | 0            | 0            | 0            | 1            |
| 1            | 0            | 0            | 0            | 0            | 0            | 1            | 0            |
| 0            | 0            | 0            | 0            | 0            | 0            | 0            | 1            |
| 0            | 0            | 0            | 0            | 0            | 0            | 0            | 1            |
| 0            | 0            | 0            | 0            | 0            | 0            | 0            | 0            |

| TCGA-DD-A73G | TCGA-DD-AA3A | TCGA-DD-AAC8 | TCGA-DD-AAC9 | TCGA-DD-AACA | TCGA-DD-AACB | TCGA-DD-AACC |
|--------------|--------------|--------------|--------------|--------------|--------------|--------------|
| 2            | 2            | 2            | 2            | 0            | 1            | 1            |
| 2            | 2            | 2            | 2            | 0            | 1            | 1            |
| 1            | 0            | 2            | 1            | 1            | 2            | 0            |
| 1            | 1            | 2            | 0            | 2            | 2            | 0            |
| 1            | 1            | 1            | 0            | 2            | 0            | 0            |
| 0            | 0            | 2            | 0            | 1            | 2            | 0            |
| 0            | 0            | 1            | 1            | 2            | 1            | 0            |
| 1            | 1            | 1            | 0            | 0            | 0            | 1            |
| 1            | 0            | 1            | 0            | 0            | 1            | 1            |
| 1            | 0            | 1            | 0            | 0            | 1            | 1            |
| 1            | 0            | 0            | 1            | 1            | 0            | 0            |
| 1            | 1            | 0            | 0            | 0            | 2            | 0            |
| 2            | 0            | 0            | 0            | 0            | 0            | 0            |
| 1            | 0            | 0            | 0            | 0            | 0            | 0            |
| 1            | 1            | 0            | 0            | 0            | 0            | 0            |
| 1            | 0            | 0            | 0            | 0            | 1            | 1            |
| 1            | 0            | 1            | 0            | 0            | 1            | 1            |
| 0            | 0            | 0            | 1            | 1            | 1            | 1            |
| 1            | 1            | 1            | 0            | 0            | 0            | 0            |
| 1            | 0            | 1            | 0            | 0            | 1            | 1            |
| 1            | 0            | 1            | 0            | 0            | 1            | 1            |
| 0            | 0            | 1            | 1            | 0            | 1            | 1            |
| 1            | 1            | 1            | 0            | 1            | 0            | 1            |
| 0            | 0            | 0            | 0            | 0            | 0            | 1            |
| 0            | 1            | 0            | 0            | 1            | 0            | 1            |
| 1            | 0            | 1            | 0            | 1            | 0            | 1            |
| 0            | 1            | 1            | 0            | 0            | 1            | 0            |
| 1            | 1            | 0            | 0            | 1            | 0            | 0            |
| 0            | 1            | 1            | 0            | 1            | 0            | 0            |
| 0            | 1            | 0            | 0            | 0            | 1            | 0            |

| TCGA-DD-AACD | TCGA-DD-AACE | TCGA-DD-AACF | TCGA-DD-AACG | TCGA-DD-AACH | TCGA-DD-AACI | TCGA-DD-AACJ |
|--------------|--------------|--------------|--------------|--------------|--------------|--------------|
| 0            | 2            | 2            | 0            | 2            | 2            | 2            |
| 1            | 2            | 2            | 0            | 2            | 2            | 2            |
| 2            | 0            | 1            | 1            | 1            | 2            | 2            |
| 1            | 2            | 1            | 0            | 0            | 1            | 1            |
| 0            | 0            | 1            | 2            | 0            | 1            | 1            |
| 1            | 2            | 1            | 0            | 1            | 1            | 1            |
| 0            | 1            | 0            | 0            | 0            | 1            | 2            |
| 1            | 0            | 1            | 1            | 1            | 1            | 1            |
| 0            | 0            | 0            | 0            | 0            | 1            | 0            |
| 0            | 0            | 0            | 0            | 0            | 1            | 0            |
| 1            | 1            | 1            | 0            | 0            | 1            | 0            |
| 1            | 0            | 0            | 0            | 0            | 0            | 1            |
| 0            | 0            | 0            | 2            | 0            | 0            | 0            |
| 0            | 0            | 0            | 0            | 0            | 2            | 1            |
| 0            | 0            | 0            | 1            | 0            | 0            | 0            |
| 1            | 1            | 0            | 1            | 1            | 0            | 1            |
| 1            | 1            | 0            | 1            | 1            | 0            | 1            |
| 0            | 1            | 1            | 1            | 1            | 0            | 1            |
| 0            | 0            | 1            | 1            | 1            | 1            | 0            |
| 0            | 1            | 1            | 1            | 0            | 0            | 0            |
| 0            | 1            | 1            | 1            | 1            | 0            | 0            |
| 0            | 1            | 1            | 1            | 1            | 1            | 0            |
| 0            | 0            | 0            | 0            | 1            | 0            | 1            |
| 0            | 0            | 1            | 1            | 1            | 1            | 0            |
| 0            | 1            | 0            | 1            | 1            | 1            | 0            |
| 0            | 0            | 0            | 0            | 0            | 0            | 1            |
| 1            | 1            | 0            | 0            | 1            | 1            | 0            |
| 0            | 1            | 0            | 1            | 1            | 1            | 0            |
| 0            | 1            | 0            | 1            | 1            | 0            | 0            |
| 1            | 1            | 0            | 0            | 0            | 0            | 0            |



| TCGA-DD-AACK | TCGA-DD-AACL | TCGA-DD-AACN | TCGA-DD-AACO | TCGA-DD-AACP | TCGA-DD-AACQ | TCGA-DD-AACS |
|--------------|--------------|--------------|--------------|--------------|--------------|--------------|
| 0            | 1            | 2            | 1            | 1            | 1            | 2            |
| 0            | 1            | 2            | 1            | 1            | 1            | 2            |
| 0            | 0            | 1            | 1            | 1            | 0            | 1            |
| 0            | 0            | 1            | 0            | 1            | 0            | 0            |
| 0            | 0            | 0            | 0            | 1            | 0            | 0            |
| 0            | 0            | 1            | 0            | 1            | 1            | 0            |
| 0            | 0            | 0            | 0            | 0            | 0            | 1            |
| 0            | 0            | 0            | 0            | 1            | 0            | 0            |
| 0            | 0            | 0            | 1            | 1            | 2            | 1            |
| 0            | 0            | 0            | 1            | 1            | 0            | 1            |
| 0            | 0            | 0            | 0            | 1            | 0            | 1            |
| 0            | 0            | 1            | 0            | 0            | 0            | 0            |
| 0            | 0            | 0            | 1            | 1            | 0            | 0            |
| 0            | 0            | 0            | 0            | 0            | 0            | 1            |
| 0            | 1            | 0            | 0            | 0            | 0            | 1            |
| 0            | 0            | 1            | 1            | 1            | 1            | 1            |
| 0            | 0            | 1            | 1            | 1            | 1            | 1            |
| 0            | 1            | 0            | 0            | 0            | 1            | 1            |
| 0            | 1            | 1            | 1            | 1            | 1            | 1            |
| 0            | 1            | 1            | 0            | 1            | 0            | 1            |
| 0            | 1            | 1            | 1            | 1            | 0            | 1            |
| 0            | 1            | 1            | 0            | 1            | 1            | 1            |
| 0            | 1            | 1            | 1            | 1            | 1            | 1            |
| 0            | 0            | 0            | 1            | 1            | 0            | 1            |
| 1            | 0            | 1            | 1            | 1            | 0            | 0            |
| 0            | 0            | 0            | 0            | 1            | 0            | 0            |
| 0            | 0            | 1            | 1            | 0            | 0            | 1            |
| 0            | 0            | 1            | 0            | 0            | 0            | 1            |
| 0            | 0            | 0            | 1            | 1            | 0            | 0            |

| TCGA-DD-AACT | TCGA-DD-AACU | TCGA-DD-AACV | TCGA-DD-AACW | TCGA-DD-AACX | TCGA-DD-AACY | TCGA-DD-AACZ |
|--------------|--------------|--------------|--------------|--------------|--------------|--------------|
| 2            | 1            | 1            | 1            | 1            | 2            | 1            |
| 2            | 1            | 1            | 1            | 2            | 2            | 1            |
| 2            | 0            | 0            | 1            | 0            | 2            | 2            |
| 1            | 0            | 0            | 0            | 0            | 0            | 1            |
| 1            | 0            | 2            | 0            | 0            | 1            | 1            |
| 1            | 0            | 0            | 0            | 0            | 0            | 0            |
| 0            | 0            | 0            | 0            | 1            | 0            | 0            |
| 2            | 0            | 0            | 0            | 0            | 1            | 1            |
| 1            | 0            | 1            | 0            | 2            | 0            | 1            |
| 1            | 0            | 1            | 0            | 0            | 0            | 1            |
| 1            | 0            | 0            | 0            | 0            | 0            | 0            |
| 1            | 0            | 0            | 0            | 0            | 0            | 0            |
| 1            | 0            | 0            | 1            | 0            | 0            | 0            |
| 1            | 0            | 0            | 0            | 0            | 2            | 0            |
| 0            | 0            | 2            | 1            | 0            | 0            | 1            |
| 0            | 1            | 0            | 0            | 0            | 1            | 1            |
| 0            | 0            | 0            | 0            | 0            | 0            | 1            |
| 0            | 1            | 1            | 0            | 1            | 0            | 1            |
| 0            | 1            | 1            | 0            | 0            | 0            | 0            |
| 0            | 1            | 1            | 1            | 0            | 0            | 1            |
| 0            | 1            | 1            | 1            | 1            | 0            | 1            |
| 0            | 1            | 1            | 1            | 1            | 0            | 1            |
| 0            | 1            | 1            | 1            | 1            | 0            | 1            |
| 0            | 1            | 1            | 1            | 1            | 0            | 1            |
| 0            | 0            | 0            | 1            | 0            | 0            | 0            |
| 0            | 1            | 1            | 1            | 0            | 0            | 1            |
| 0            | 0            | 0            | 1            | 0            | 0            | 0            |
| 0            | 1            | 0            | 1            | 0            | 1            | 0            |
| 0            | 1            | 0            | 0            | 1            | 0            | 1            |
| 0            | 1            | 1            | 0            | 1            | 0            | 1            |
| 0            | 1            | 0            | 0            | 0            | 0            | 1            |

| TCGA-DD-AAD0 | TCGA-DD-AAD1 | TCGA-DD-AAD2 | TCGA-DD-AAD3 | TCGA-DD-AAD5 | TCGA-DD-AAD6 | TCGA-DD-AAD8 |
|--------------|--------------|--------------|--------------|--------------|--------------|--------------|
| 1            | 0            | 1            | 1            | 1            | 0            | 1            |
| 1            | 1            | 1            | 1            | 2            | 0            | 1            |
| 1            | 2            | 2            | 0            | 2            | 2            | 0            |
| 0            | 0            | 0            | 1            | 0            | 0            | 0            |
| 0            | 0            | 2            | 0            | 1            | 0            | 1            |
| 0            | 0            | 0            | 1            | 0            | 0            | 0            |
| 0            | 0            | 0            | 0            | 1            | 2            | 0            |
| 0            | 1            | 1            | 0            | 0            | 0            | 0            |
| 2            | 0            | 0            | 0            | 0            | 1            | 0            |
| 2            | 0            | 0            | 0            | 0            | 1            | 0            |
| 0            | 0            | 0            | 0            | 0            | 0            | 0            |
| 0            | 0            | 0            | 1            | 0            | 0            | 0            |
| 0            | 0            | 0            | 0            | 0            | 0            | 0            |
| 0            | 0            | 1            | 0            | 0            | 0            | 0            |
| 0            | 0            | 0            | 0            | 1            | 0            | 0            |
| 1            | 1            | 1            | 1            | 1            | 0            | 1            |
| 1            | 1            | 1            | 1            | 1            | 0            | 1            |
| 1            | 1            | 0            | 1            | 1            | 1            | 1            |
| 0            | 1            | 0            | 0            | 0            | 0            | 1            |
| 0            | 0            | 0            | 1            | 1            | 0            | 1            |
| 0            | 0            | 0            | 1            | 1            | 0            | 1            |
| 0            | 0            | 1            | 1            | 1            | 0            | 1            |
| 1            | 1            | 0            | 0            | 1            | 1            | 0            |
| 1            | 1            | 0            | 1            | 0            | 0            | 0            |
| 0            | 0            | 0            | 1            | 0            | 0            | 0            |
| 1            | 1            | 0            | 0            | 1            | 1            | 0            |
| 1            | 0            | 0            | 1            | 0            | 0            | 1            |
| 0            | 0            | 0            | 0            | 1            | 1            | 0            |
| 0            | 0            | 0            | 0            | 1            | 1            | 0            |
| 0            | 0            | 0            | 1            | 0            | 0            | 1            |

| TCGA-DD-AADA | TCGA-DD-AADB | TCGA-DD-AADC | TCGA-DD-AADD | TCGA-DD-AADF | TCGA-DD-AADG | TCGA-DD-AADI |
|--------------|--------------|--------------|--------------|--------------|--------------|--------------|
| 2            | 0            | 1            | 2            | 2            | 1            | 2            |
| 2            | 0            | 1            | 2            | 2            | 1            | 2            |
| 1            | 1            | 2            | 2            | 0            | 0            | 1            |
| 2            | 0            | 0            | 0            | 2            | 1            | 0            |
| 0            | 0            | 2            | 0            | 2            | 1            | 0            |
| 2            | 0            | 0            | 0            | 1            | 1            | 0            |
| 0            | 0            | 2            | 1            | 2            | 1            | 0            |
| 0            | 0            | 1            | 0            | 2            | 1            | 1            |
| 1            | 0            | 0            | 2            | 1            | 0            | 0            |
| 1            | 0            | 0            | 2            | 2            | 0            | 0            |
| 0            | 0            | 0            | 1            | 0            | 1            | 0            |
| 0            | 0            | 0            | 0            | 1            | 0            | 0            |
| 0            | 1            | 2            | 1            | 1            | 0            | 0            |
| 0            | 0            | 0            | 0            | 0            | 0            | 0            |
| 0            | 0            | 2            | 1            | 0            | 0            | 0            |
| 1            | 1            | 1            | 1            | 1            | 1            | 1            |
| 1            | 1            | 1            | 1            | 1            | 1            | 1            |
| 0            | 1            | 1            | 1            | 1            | 1            | 0            |
| 0            | 0            | 1            | 1            | 1            | 0            | 1            |
| 0            | 1            | 1            | 1            | 1            | 0            | 1            |
| 0            | 1            | 1            | 1            | 1            | 0            | 1            |
| 0            | 1            | 1            | 1            | 1            | 0            | 1            |
| 1            | 1            | 1            | 1            | 1            | 0            | 1            |
| 1            | 1            | 0            | 0            | 0            | 0            | 1            |
| 0            | 0            | 1            | 0            | 0            | 0            | 0            |
| 1            | 1            | 1            | 0            | 0            | 0            | 1            |
| 0            | 0            | 0            | 0            | 1            | 1            | 0            |
| 0            | 1            | 0            | 1            | 1            | 0            | 0            |
| 0            | 1            | 0            | 1            | 1            | 0            | 0            |
| 0            | 0            | 0            | 0            | 0            | 0            | 0            |

| TCGA-DD-AADJ | TCGA-DD-AADK | TCGA-DD-AADL | TCGA-DD-AADM | TCGA-DD-AADN | TCGA-DD-AADO | TCGA-DD-AADP |
|--------------|--------------|--------------|--------------|--------------|--------------|--------------|
| 1            | 1            | 1            | 2            | 0            | 1            | 1            |
| 1            | 1            | 1            | 2            | 0            | 1            | 1            |
| 0            | 2            | 1            | 2            | 2            | 2            | 1            |
| 0            | 0            | 1            | 0            | 1            | 1            | 0            |
| 0            | 0            | 0            | 0            | 1            | 0            | 0            |
| 0            | 0            | 1            | 2            | 1            | 1            | 1            |
| 0            | 0            | 0            | 0            | 2            | 1            | 0            |
| 0            | 1            | 0            | 2            | 1            | 0            | 0            |
| 0            | 0            | 0            | 0            | 1            | 1            | 0            |
| 0            | 0            | 0            | 0            | 1            | 1            | 0            |
| 0            | 0            | 1            | 1            | 0            | 0            | 0            |
| 0            | 0            | 1            | 0            | 1            | 1            | 0            |
| 0            | 0            | 1            | 0            | 1            | 1            | 0            |
| 0            | 0            | 0            | 2            | 0            | 0            | 0            |
| 0            | 0            | 0            | 0            | 1            | 1            | 0            |
| 0            | 0            | 1            | 0            | 1            | 0            | 0            |
| 0            | 1            | 0            | 1            | 1            | 1            | 1            |
| 0            | 1            | 0            | 0            | 1            | 1            | 1            |
| 0            | 0            | 1            | 0            | 1            | 0            | 0            |
| 0            | 1            | 1            | 1            | 0            | 1            | 0            |
| 0            | 0            | 1            | 0            | 0            | 1            | 1            |
| 0            | 0            | 1            | 0            | 0            | 1            | 1            |
| 0            | 1            | 1            | 1            | 0            | 1            | 1            |
| 1            | 1            | 0            | 1            | 1            | 1            | 1            |
| 1            | 1            | 1            | 1            | 0            | 1            | 1            |
| 1            | 1            | 1            | 0            | 1            | 0            | 1            |
| 1            | 1            | 0            | 1            | 0            | 1            | 1            |
| 1            | 0            | 1            | 0            | 1            | 0            | 1            |
| 0            | 0            | 1            | 1            | 1            | 1            | 0            |
| 0            | 0            | 1            | 1            | 1            | 1            | 0            |
| 1            | 1            | 1            | 0            | 0            | 1            | 0            |

| TCGA-DD-AADQ | TCGA-DD-AADR | TCGA-DD-AADS | TCGA-DD-AADU | TCGA-DD-AADV | TCGA-DD-AADW | TCGA-DD-AADY |
|--------------|--------------|--------------|--------------|--------------|--------------|--------------|
| 0            | 1            | 0            | 0            | 1            | 2            | 2            |
| 0            | 1            | 0            | 2            | 1            | 1            | 2            |
| 2            | 2            | 0            | 2            | 1            | 0            | 0            |
| 2            | 0            | 0            | 0            | 1            | 0            | 0            |
| 2            | 1            | 0            | 1            | 1            | 0            | 0            |
| 2            | 0            | 0            | 0            | 1            | 1            | 0            |
| 0            | 1            | 0            | 1            | 0            | 1            | 0            |
| 2            | 1            | 1            | 2            | 1            | 0            | 0            |
| 0            | 0            | 2            | 1            | 0            | 1            | 0            |
| 0            | 0            | 2            | 1            | 0            | 1            | 0            |
| 0            | 0            | 1            | 0            | 1            | 1            | 0            |
| 2            | 0            | 0            | 0            | 1            | 0            | 0            |
| 0            | 0            | 0            | 0            | 0            | 0            | 0            |
| 0            | 0            | 0            | 1            | 0            | 1            | 0            |
| 0            | 1            | 0            | 1            | 0            | 0            | 0            |
| 1            | 1            | 0            | 0            | 1            | 0            | 0            |
| 1            | 1            | 0            | 0            | 1            | 0            | 0            |
| 0            | 1            | 0            | 0            | 1            | 1            | 1            |
| 0            | 1            | 0            | 0            | 1            | 1            | 1            |
| 0            | 1            | 0            | 0            | 1            | 0            | 1            |
| 0            | 1            | 0            | 0            | 1            | 0            | 1            |
| 0            | 1            | 0            | 0            | 1            | 1            | 1            |
| 0            | 1            | 0            | 0            | 0            | 1            | 1            |
| 0            | 1            | 0            | 0            | 1            | 1            | 1            |
| 1            | 0            | 1            | 0            | 1            | 0            | 0            |
| 0            | 1            | 0            | 0            | 0            | 1            | 1            |
| 1            | 1            | 0            | 0            | 1            | 1            | 1            |
| 0            | 1            | 0            | 0            | 1            | 1            | 0            |
| 0            | 1            | 0            | 0            | 1            | 1            | 0            |
| 0            | 0            | 0            | 0            | 1            | 0            | 0            |

| TCGA-DD-AAE0 | TCGA-DD-AAE1 | TCGA-DD-AAE2 | TCGA-DD-AAE3 | TCGA-DD-AAE4 | TCGA-DD-AAE6 | TCGA-DD-AAE7 | TCGA-DD-AAE9 |
|--------------|--------------|--------------|--------------|--------------|--------------|--------------|--------------|
| 2            | 2            | 0            | 1            | 0            | 2            | 1            | 2            |
| 2            | 2            | 0            | 0            | 0            | 2            | 1            | 2            |
| 1            | 2            | 0            | 1            | 0            | 1            | 1            | 2            |
| 1            | 0            | 0            | 2            | 1            | 0            | 2            | 2            |
| 0            | 0            | 1            | 2            | 0            | 2            | 0            | 0            |
| 1            | 0            | 1            | 1            | 0            | 0            | 0            | 2            |
| 1            | 0            | 2            | 1            | 0            | 0            | 0            | 0            |
| 1            | 1            | 0            | 2            | 0            | 0            | 0            | 0            |
| 2            | 0            | 0            | 1            | 0            | 2            | 0            | 1            |
| 2            | 0            | 0            | 1            | 0            | 2            | 0            | 1            |
| 0            | 0            | 2            | 1            | 0            | 2            | 0            | 1            |
| 1            | 0            | 0            | 2            | 0            | 0            | 0            | 0            |
| 1            | 0            | 0            | 0            | 0            | 0            | 1            | 0            |
| 0            | 0            | 0            | 1            | 0            | 0            | 0            | 1            |
| 0            | 1            | 0            | 0            | 0            | 1            | 0            | 1            |
| 1            | 0            | 0            | 0            | 1            | 1            | 1            | 1            |
| 1            | 0            | 0            | 0            | 1            | 0            | 1            | 1            |
| 1            | 1            | 1            | 0            | 1            | 1            | 0            | 0            |
| 1            | 0            | 1            | 1            | 1            | 0            | 0            | 0            |
| 1            | 1            | 0            | 0            | 0            | 1            | 0            | 0            |
| 1            | 1            | 0            | 0            | 0            | 1            | 0            | 0            |
| 1            | 1            | 0            | 0            | 0            | 1            | 0            | 0            |
| 1            | 1            | 1            | 1            | 0            | 0            | 0            | 0            |
| 1            | 1            | 0            | 0            | 0            | 1            | 0            | 0            |
| 0            | 1            | 0            | 1            | 0            | 1            | 0            | 0            |
| 1            | 1            | 0            | 1            | 0            | 0            | 0            | 0            |
| 0            | 0            | 1            | 1            | 0            | 0            | 0            | 1            |
| 1            | 0            | 0            | 0            | 0            | 1            | 0            | 0            |
| 1            | 0            | 0            | 1            | 0            | 1            | 0            | 0            |
| 0            | 0            | 0            | 0            | 0            | 0            | 0            | 0            |

| TCGA-DD-AAEA | TCGA-DD-AAEB | TCGA-DD-AAED | TCGA-DD-AAEE | TCGA-DD-AAEG | TCGA-DD-AAEH | TCGA-DD-AAEI |
|--------------|--------------|--------------|--------------|--------------|--------------|--------------|
| 1            | 1            | 0            | 0            | 2            | 1            | 0            |
| 1            | 1            | 2            | 0            | 2            | 1            | 0            |
| 0            | 1            | 1            | 1            | 2            | 1            | 2            |
| 0            | 0            | 0            | 0            | 0            | 2            | 0            |
| 1            | 0            | 0            | 1            | 1            | 0            | 0            |
| 0            | 0            | 0            | 0            | 1            | 2            | 0            |
| 1            | 0            | 0            | 1            | 0            | 0            | 0            |
| 0            | 0            | 0            | 2            | 1            | 0            | 0            |
| 1            | 0            | 0            | 0            | 1            | 1            | 0            |
| 1            | 0            | 0            | 0            | 1            | 1            | 0            |
| 1            | 1            | 0            | 0            | 0            | 0            | 1            |
| 0            | 0            | 0            | 0            | 2            | 0            | 0            |
| 1            | 0            | 0            | 0            | 0            | 0            | 0            |
| 0            | 0            | 0            | 0            | 0            | 2            | 0            |
| 0            | 0            | 0            | 0            | 0            | 0            | 0            |
| 0            | 1            | 1            | 1            | 1            | 1            | 1            |
| 0            | 1            | 1            | 1            | 1            | 1            | 1            |
| 1            | 1            | 1            | 1            | 0            | 0            | 1            |
| 1            | 0            | 1            | 1            | 1            | 0            | 1            |
| 1            | 0            | 1            | 0            | 0            | 0            | 0            |
| 1            | 0            | 1            | 0            | 0            | 0            | 0            |
| 0            | 1            | 0            | 1            | 0            | 0            | 0            |
| 0            | 0            | 0            | 0            | 0            | 1            | 0            |
| 0            | 0            | 1            | 0            | 1            | 1            | 0            |
| 0            | 0            | 1            | 1            | 0            | 0            | 0            |
| 0            | 0            | 0            | 1            | 0            | 0            | 0            |
| 0            | 0            | 0            | 1            | 0            | 0            | 0            |
| 0            | 0            | 0            | 1            | 1            | 1            | 0            |
| 0            | 0            | 1            | 1            | 1            | 0            | 0            |
| 0            | 0            | 1            | 1            | 1            | 0            | 0            |
| 1            | 0            | 1            | 0            | 0            | 0            | 0            |



| TCGA-DD-AAEK | TCGA-DD-AAVP | TCGA-DD-AAVQ | TCGA-DD-AAVR | TCGA-DD-AAVS | TCGA-DD-AAVU | TCGA-DD-AAVV |
|--------------|--------------|--------------|--------------|--------------|--------------|--------------|
| 1            | 2            | 2            | 2            | 1            | 0            | 2            |
| 1            | 2            | 2            | 2            | 1            | 0            | 2            |
| 2            | 0            | 1            | 1            | 2            | 1            | 1            |
| 1            | 0            | 0            | 2            | 2            | 0            | 1            |
| 2            | 0            | 0            | 0            | 0            | 2            | 2            |
| 1            | 0            | 0            | 1            | 2            | 0            | 1            |
| 1            | 0            | 0            | 1            | 0            | 0            | 1            |
| 1            | 1            | 0            | 1            | 0            | 1            | 1            |
| 1            | 0            | 0            | 1            | 0            | 0            | 2            |
| 1            | 0            | 0            | 0            | 0            | 0            | 1            |
| 0            | 0            | 0            | 0            | 0            | 0            | 1            |
| 1            | 0            | 0            | 0            | 2            | 0            | 1            |
| 1            | 0            | 0            | 0            | 0            | 0            | 1            |
| 0            | 2            | 1            | 0            | 0            | 0            | 0            |
| 1            | 0            | 0            | 0            | 1            | 0            | 1            |
| 0            | 1            | 1            | 1            | 1            | 1            | 0            |
| 0            | 1            | 1            | 1            | 1            | 1            | 0            |
| 1            | 1            | 1            | 1            | 0            | 1            | 1            |
| 1            | 1            | 1            | 0            | 0            | 0            | 1            |
| 1            | 0            | 1            | 0            | 1            | 1            | 1            |
| 1            | 0            | 1            | 0            | 1            | 1            | 1            |
| 1            | 0            | 1            | 0            | 1            | 1            | 0            |
| 1            | 0            | 1            | 0            | 1            | 0            | 0            |
| 1            | 1            | 1            | 0            | 1            | 1            | 1            |
| 1            | 0            | 1            | 0            | 1            | 1            | 0            |
| 1            | 0            | 1            | 0            | 1            | 1            | 0            |
| 1            | 0            | 0            | 0            | 1            | 1            | 0            |
| 1            | 1            | 0            | 0            | 0            | 1            | 1            |
| 0            | 1            | 0            | 0            | 0            | 1            | 1            |
| 1            | 0            | 1            | 0            | 0            | 1            | 0            |

| TCGA-DD-AAVW | TCGA-DD-AAVX | TCGA-DD-AAVY | TCGA-DD-AAVZ | TCGA-DD-AAW0 | TCGA-DD-AAW1 | TCGA-DD-AAW2 |
|--------------|--------------|--------------|--------------|--------------|--------------|--------------|
| 1            | 0            | 2            | 2            | 2            | 1            | 1            |
| 1            | 0            | 2            | 2            | 2            | 1            | 1            |
| 2            | 2            | 2            | 2            | 1            | 2            | 2            |
| 1            | 0            | 2            | 0            | 0            | 0            | 2            |
| 0            | 0            | 2            | 0            | 0            | 0            | 1            |
| 1            | 0            | 2            | 0            | 0            | 0            | 2            |
| 0            | 0            | 0            | 0            | 0            | 1            | 0            |
| 0            | 1            | 2            | 0            | 1            | 0            | 1            |
| 0            | 0            | 0            | 0            | 0            | 0            | 0            |
| 0            | 0            | 0            | 0            | 0            | 0            | 0            |
| 0            | 1            | 0            | 0            | 0            | 0            | 1            |
| 1            | 0            | 0            | 0            | 0            | 0            | 2            |
| 0            | 0            | 0            | 0            | 0            | 0            | 0            |
| 0            | 0            | 2            | 0            | 0            | 1            | 1            |
| 0            | 0            | 0            | 0            | 1            | 0            | 0            |
| 0            | 0            | 1            | 1            | 1            | 0            | 1            |
| 1            | 0            | 1            | 1            | 1            | 0            | 1            |
| 1            | 0            | 0            | 0            | 0            | 1            | 0            |
| 0            | 0            | 0            | 0            | 0            | 0            | 0            |
| 1            | 0            | 0            | 1            | 1            | 0            | 0            |
| 1            | 0            | 0            | 1            | 1            | 0            | 0            |
| 1            | 0            | 0            | 1            | 1            | 0            | 0            |
| 1            | 0            | 0            | 1            | 1            | 0            | 0            |
| 1            | 0            | 0            | 1            | 1            | 0            | 0            |
| 1            | 0            | 0            | 1            | 1            | 0            | 0            |
| 1            | 0            | 0            | 1            | 1            | 0            | 0            |
| 1            | 0            | 0            | 1            | 1            | 0            | 0            |
| 0            | 0            | 1            | 0            | 1            | 0            | 1            |
| 0            | 0            | 0            | 0            | 0            | 0            | 0            |
| 0            | 0            | 0            | 0            | 0            | 0            | 0            |
| 1            | 0            | 0            | 1            | 1            | 0            | 0            |

| TCGA-DD-AAW3 | TCGA-ED-A459 | TCGA-ED-A4XI | TCGA-ED-A5KG | TCGA-ED-A66X | TCGA-ED-A66Y | TCGA-ED-A7PX | TCGA-ED-A7PY |
|--------------|--------------|--------------|--------------|--------------|--------------|--------------|--------------|
| 1            | 1            | 1            | 0            | 1            | 1            | 0            | 2            |
| 1            | 1            | 1            | 1            | 1            | 1            | 0            | 2            |
| 2            | 1            | 0            | 0            | 2            | 2            | 0            | 1            |
| 2            | 0            | 0            | 0            | 1            | 0            | 0            | 0            |
| 0            | 1            | 0            | 0            | 1            | 1            | 0            | 0            |
| 2            | 0            | 0            | 0            | 1            | 0            | 0            | 1            |
| 0            | 0            | 0            | 0            | 1            | 1            | 0            | 0            |
| 0            | 0            | 0            | 0            | 0            | 1            | 0            | 0            |
| 0            | 0            | 0            | 0            | 1            | 1            | 0            | 0            |
| 0            | 0            | 0            | 0            | 1            | 1            | 0            | 0            |
| 1            | 1            | 0            | 0            | 0            | 1            | 0            | 1            |
| 2            | 0            | 0            | 0            | 1            | 0            | 0            | 0            |
| 0            | 0            | 0            | 0            | 1            | 1            | 0            | 0            |
| 0            | 0            | 0            | 0            | 0            | 1            | 0            | 0            |
| 0            | 0            | 0            | 0            | 0            | 0            | 1            | 0            |
| 1            | 1            | 0            | 0            | 1            | 0            | 0            | 1            |
| 1            | 1            | 1            | 0            | 1            | 0            | 0            | 1            |
| 0            | 1            | 0            | 0            | 0            | 0            | 1            | 0            |
| 0            | 1            | 1            | 0            | 0            | 1            | 1            | 0            |
| 0            | 1            | 0            | 0            | 1            | 0            | 1            | 1            |
| 0            | 1            | 0            | 0            | 1            | 0            | 1            | 1            |
| 0            | 1            | 0            | 0            | 1            | 0            | 0            | 1            |
| 0            | 0            | 1            | 0            | 1            | 1            | 1            | 1            |
| 0            | 1            | 0            | 1            | 1            | 1            | 0            | 1            |
| 0            | 1            | 1            | 0            | 1            | 0            | 0            | 0            |
| 0            | 1            | 0            | 0            | 1            | 1            | 0            | 1            |
| 1            | 1            | 0            | 0            | 0            | 1            | 1            | 0            |
| 1            | 1            | 0            | 0            | 0            | 0            | 1            | 0            |
| 1            | 1            | 0            | 0            | 0            | 0            | 1            | 0            |
| 0            | 1            | 0            | 0            | 1            | 0            | 1            | 0            |

| TCGA-ED-A7PZ | TCGA-ED-A7XO | TCGA-ED-A7XP | TCGA-ED-A82E | TCGA-ED-A805 | TCGA-ED-A806 | TCGA-ED-A97K | TCGA-EP-A12J |
|--------------|--------------|--------------|--------------|--------------|--------------|--------------|--------------|
| 1            | 1            | 2            | 1            | 1            | 1            | 0            | 1            |
| 1            | 1            | 2            | 1            | 2            | 1            | 0            | 1            |
| 1            | 0            | 2            | 1            | 0            | 2            | 1            | 2            |
| 2            | 1            | 0            | 1            | 2            | 1            | 0            | 0            |
| 0            | 1            | 1            | 1            | 0            | 1            | 0            | 0            |
| 2            | 0            | 0            | 1            | 2            | 1            | 0            | 0            |
| 1            | 0            | 1            | 0            | 0            | 1            | 0            | 0            |
| 0            | 1            | 2            | 0            | 0            | 0            | 0            | 0            |
| 0            | 1            | 0            | 1            | 1            | 2            | 0            | 0            |
| 0            | 1            | 0            | 1            | 0            | 2            | 0            | 0            |
| 0            | 0            | 0            | 0            | 0            | 0            | 0            | 0            |
| 2            | 0            | 0            | 0            | 1            | 0            | 0            | 0            |
| 2            | 2            | 0            | 1            | 0            | 0            | 0            | 0            |
| 1            | 0            | 0            | 0            | 0            | 0            | 0            | 1            |
| 1            | 0            | 0            | 1            | 0            | 0            | 0            | 0            |
| 1            | 1            | 0            | 0            | 0            | 1            | 0            | 1            |
| 1            | 1            | 0            | 0            | 0            | 1            | 0            | 1            |
| 1            | 1            | 1            | 1            | 0            | 1            | 1            | 0            |
| 1            | 1            | 1            | 1            | 0            | 0            | 0            | 0            |
| 1            | 1            | 1            | 0            | 1            | 0            | 1            | 0            |
| 1            | 1            | 1            | 0            | 1            | 0            | 1            | 0            |
| 1            | 1            | 1            | 0            | 1            | 0            | 1            | 0            |
| 0            | 0            | 0            | 1            | 1            | 1            | 1            | 0            |
| 0            | 0            | 0            | 0            | 1            | 1            | 0            | 0            |
| 1            | 0            | 1            | 1            | 0            | 1            | 1            | 0            |
| 0            | 0            | 0            | 1            | 1            | 1            | 1            | 0            |
| 1            | 0            | 0            | 1            | 1            | 1            | 1            | 1            |
| 1            | 0            | 1            | 1            | 0            | 1            | 1            | 1            |
| 1            | 0            | 1            | 1            | 0            | 1            | 1            | 1            |
| 1            | 0            | 1            | 0            | 0            | 0            | 0            | 0            |

| TCGA-EP-A26S | TCGA-EP-A2KA | TCGA-EP-A2KB | TCGA-EP-A2KC | TCGA-EP-A3JL | TCGA-EP-A3RK | TCGA-ES-A2HS | TCGA-ES-A2HT |
|--------------|--------------|--------------|--------------|--------------|--------------|--------------|--------------|
| 1            | 2            | 1            | 2            | 2            | 1            | 0            | 2            |
| 1            | 1            | 1            | 2            | 2            | 1            | 0            | 2            |
| 0            | 2            | 1            | 2            | 2            | 1            | 2            | 2            |
| 0            | 2            | 1            | 1            | 0            | 0            | 2            | 0            |
| 0            | 0            | 1            | 1            | 2            | 0            | 0            | 1            |
| 0            | 1            | 1            | 1            | 0            | 0            | 1            | 0            |
| 0            | 0            | 1            | 1            | 0            | 0            | 1            | 0            |
| 0            | 0            | 1            | 1            | 1            | 0            | 0            | 1            |
| 0            | 2            | 1            | 0            | 1            | 0            | 1            | 0            |
| 0            | 0            | 1            | 0            | 1            | 0            | 1            | 0            |
| 1            | 2            | 0            | 1            | 1            | 0            | 1            | 0            |
| 0            | 0            | 1            | 1            | 0            | 0            | 1            | 0            |
| 0            | 2            | 1            | 1            | 0            | 0            | 1            | 0            |
| 0            | 2            | 0            | 0            | 1            | 0            | 1            | 0            |
| 0            | 2            | 0            | 0            | 0            | 0            | 1            | 0            |
| 1            | 1            | 0            | 1            | 1            | 1            | 1            | 1            |
| 1            | 1            | 0            | 1            | 1            | 1            | 1            | 1            |
| 0            | 0            | 0            | 1            | 0            | 0            | 1            | 0            |
| 0            | 0            | 0            | 0            | 0            | 1            | 0            | 0            |
| 0            | 0            | 1            | 1            | 0            | 0            | 0            | 0            |
| 0            | 0            | 1            | 1            | 0            | 0            | 0            | 0            |
| 0            | 0            | 1            | 1            | 0            | 0            | 0            | 0            |
| 0            | 0            | 1            | 1            | 0            | 1            | 1            | 0            |
| 0            | 0            | 1            | 0            | 0            | 0            | 1            | 0            |
| 0            | 1            | 1            | 1            | 0            | 1            | 0            | 0            |
| 0            | 0            | 1            | 1            | 0            | 1            | 1            | 0            |
| 0            | 0            | 0            | 0            | 0            | 1            | 1            | 0            |
| 0            | 0            | 1            | 0            | 0            | 1            | 0            | 0            |
| 0            | 0            | 1            | 0            | 0            | 1            | 0            | 0            |
| 0            | 0            | 0            | 1            | 0            | 1            | 0            | 0            |

| TCGA-FV-A23B | TCGA-FV-A2QQ | TCGA-FV-A2QR | TCGA-FV-A3I0 | TCGA-FV-A3I1 | TCGA-FV-A3R2 | TCGA-FV-A3R3 | TCGA-FV-A495 |
|--------------|--------------|--------------|--------------|--------------|--------------|--------------|--------------|
| 1            | 1            | 2            | 0            | 1            | 0            | 1            | 2            |
| 1            | 1            | 2            | 0            | 1            | 0            | 1            | 1            |
| 0            | 2            | 0            | 1            | 1            | 1            | 0            | 0            |
| 2            | 0            | 0            | 1            | 0            | 1            | 0            | 0            |
| 1            | 1            | 1            | 1            | 0            | 0            | 0            | 2            |
| 0            | 0            | 0            | 1            | 0            | 1            | 1            | 0            |
| 0            | 0            | 1            | 0            | 0            | 0            | 0            | 1            |
| 0            | 0            | 0            | 1            | 0            | 1            | 0            | 1            |
| 1            | 1            | 0            | 0            | 0            | 1            | 0            | 0            |
| 1            | 1            | 0            | 0            | 0            | 1            | 0            | 1            |
| 0            | 0            | 0            | 0            | 1            | 1            | 0            | 0            |
| 0            | 0            | 0            | 1            | 0            | 0            | 0            | 0            |
| 0            | 1            | 0            | 1            | 0            | 0            | 0            | 1            |
| 0            | 0            | 1            | 0            | 0            | 0            | 0            | 0            |
| 0            | 0            | 0            | 0            | 0            | 1            | 0            | 1            |
| 0            | 1            | 1            | 1            | 1            | 1            | 0            | 1            |
| 0            | 1            | 1            | 1            | 1            | 1            | 0            | 1            |
| 1            | 1            | 1            | 1            | 1            | 1            | 0            | 1            |
| 0            | 0            | 0            | 1            | 1            | 1            | 0            | 1            |
| 0            | 1            | 0            | 0            | 1            | 0            | 0            | 0            |
| 0            | 1            | 0            | 0            | 1            | 0            | 0            | 1            |
| 0            | 1            | 1            | 0            | 1            | 0            | 0            | 0            |
| 1            | 1            | 1            | 1            | 0            | 0            | 1            | 1            |
| 1            | 1            | 0            | 1            | 0            | 1            | 0            | 0            |
| 1            | 1            | 0            | 1            | 1            | 1            | 0            | 0            |
| 1            | 1            | 0            | 1            | 0            | 0            | 1            | 0            |
| 1            | 0            | 1            | 1            | 0            | 1            | 0            | 0            |
| 0            | 0            | 0            | 1            | 0            | 0            | 0            | 1            |
| 0            | 0            | 0            | 1            | 0            | 0            | 0            | 0            |
| 0            | 1            | 0            | 1            | 1            | 1            | 1            | 0            |

| TCGA-FV-A496 | TCGA-FV-A4ZP | TCGA-FV-A4ZQ | TCGA-G3-A25S | TCGA-G3-A25T | TCGA-G3-A25U | TCGA-G3-A25V | TCGA-G3-A25Y |
|--------------|--------------|--------------|--------------|--------------|--------------|--------------|--------------|
| 1            | 2            | 0            | 1            | 0            | 1            | 0            | 2            |
| 1            | 0            | 0            | 1            | 0            | 0            | 0            | 1            |
| 0            | 2            | 2            | 0            | 1            | 1            | 1            | 0            |
| 0            | 0            | 2            | 2            | 0            | 1            | 0            | 0            |
| 0            | 1            | 1            | 1            | 1            | 0            | 0            | 0            |
| 0            | 0            | 2            | 2            | 0            | 1            | 0            | 2            |
| 1            | 1            | 0            | 2            | 0            | 1            | 0            | 0            |
| 0            | 0            | 1            | 1            | 1            | 0            | 0            | 0            |
| 0            | 0            | 2            | 1            | 0            | 0            | 0            | 0            |
| 0            | 0            | 2            | 1            | 0            | 0            | 0            | 0            |
| 0            | 2            | 0            | 0            | 1            | 0            | 1            | 1            |
| 0            | 0            | 0            | 0            | 0            | 1            | 0            | 0            |
| 0            | 0            | 1            | 0            | 1            | 0            | 0            | 0            |
| 1            | 0            | 1            | 0            | 0            | 1            | 0            | 0            |
| 0            | 0            | 0            | 0            | 0            | 0            | 0            | 0            |
| 0            | 1            | 1            | 1            | 0            | 0            | 1            | 1            |
| 0            | 1            | 1            | 1            | 0            | 0            | 1            | 0            |
| 1            | 1            | 0            | 1            | 0            | 1            | 1            | 1            |
| 0            | 0            | 0            | 1            | 1            | 0            | 0            | 1            |
| 1            | 1            | 0            | 1            | 0            | 0            | 0            | 1            |
| 1            | 1            | 0            | 1            | 0            | 0            | 0            | 1            |
| 1            | 1            | 0            | 1            | 0            | 0            | 0            | 1            |
| 1            | 1            | 0            | 1            | 0            | 0            | 1            | 1            |
| 0            | 0            | 0            | 1            | 0            | 1            | 0            | 1            |
| 0            | 1            | 0            | 1            | 1            | 0            | 0            | 0            |
| 1            | 1            | 0            | 1            | 0            | 0            | 0            | 1            |
| 1            | 1            | 0            | 1            | 1            | 0            | 0            | 1            |
| 0            | 1            | 0            | 1            | 0            | 0            | 0            | 0            |
| 0            | 1            | 0            | 1            | 0            | 0            | 0            | 0            |
| 0            | 1            | 0            | 1            | 0            | 0            | 0            | 0            |
| 0            | 1            | 0            | 1            | 1            | 0            | 0            | 0            |

| TCGA-G3-A25Z | TCGA-G3-A3CG | TCGA-G3-A3CH | TCGA-G3-A3CI | TCGA-G3-A3CK | TCGA-G3-A5SI | TCGA-G3-A5SJ | TCGA-G3-A5SL |
|--------------|--------------|--------------|--------------|--------------|--------------|--------------|--------------|
| 1            | 2            | 0            | 0            | 1            | 2            | 0            | 2            |
| 1            | 2            | 0            | 0            | 1            | 2            | 0            | 2            |
| 1            | 1            | 1            | 0            | 0            | 2            | 2            | 2            |
| 0            | 1            | 0            | 0            | 1            | 0            | 0            | 2            |
| 0            | 1            | 0            | 0            | 0            | 1            | 0            | 0            |
| 0            | 1            | 0            | 0            | 1            | 2            | 0            | 2            |
| 1            | 0            | 0            | 0            | 1            | 2            | 1            | 1            |
| 0            | 1            | 0            | 0            | 0            | 0            | 0            | 0            |
| 0            | 0            | 0            | 0            | 0            | 0            | 0            | 0            |
| 0            | 0            | 0            | 0            | 0            | 0            | 0            | 0            |
| 0            | 1            | 0            | 0            | 0            | 0            | 0            | 1            |
| 0            | 1            | 0            | 0            | 1            | 0            | 0            | 0            |
| 0            | 0            | 0            | 0            | 0            | 0            | 0            | 0            |
| 0            | 1            | 0            | 0            | 0            | 1            | 0            | 1            |
| 0            | 0            | 0            | 0            | 0            | 0            | 0            | 0            |
| 0            | 1            | 0            | 0            | 0            | 0            | 1            | 1            |
| 0            | 1            | 0            | 0            | 0            | 0            | 0            | 1            |
| 1            | 0            | 1            | 0            | 0            | 1            | 1            | 1            |
| 0            | 0            | 1            | 0            | 0            | 1            | 0            | 0            |
| 1            | 0            | 0            | 0            | 0            | 1            | 0            | 0            |
| 1            | 0            | 0            | 0            | 0            | 1            | 0            | 0            |
| 1            | 0            | 0            | 0            | 0            | 1            | 0            | 0            |
| 0            | 0            | 0            | 0            | 0            | 1            | 0            | 1            |
| 1            | 0            | 1            | 0            | 0            | 1            | 0            | 0            |
| 0            | 0            | 0            | 0            | 0            | 0            | 0            | 0            |
| 0            | 0            | 0            | 0            | 0            | 1            | 0            | 1            |
| 0            | 1            | 0            | 0            | 0            | 0            | 0            | 1            |
| 0            | 0            | 1            | 0            | 0            | 0            | 0            | 0            |
| 0            | 0            | 1            | 0            | 0            | 0            | 0            | 0            |
| 0            | 0            | 1            | 0            | 0            | 0            | 0            | 0            |
| 0            | 0            | 1            | 0            | 0            | 0            | 0            | 0            |



| TCGA-G3-A5SM | TCGA-G3-A6UC | TCGA-G3-A7M5 | TCGA-G3-A7M6 | TCGA-G3-A7M7 | TCGA-G3-A7M8 | TCGA-G3-A7M9 |
|--------------|--------------|--------------|--------------|--------------|--------------|--------------|
| 2            | 1            | 0            | 1            | 0            | 0            | 1            |
| 2            | 1            | 0            | 1            | 0            | 0            | 1            |
| 0            | 0            | 0            | 2            | 2            | 0            | 0            |
| 0            | 2            | 0            | 0            | 0            | 0            | 0            |
| 1            | 0            | 1            | 2            | 0            | 0            | 1            |
| 0            | 2            | 0            | 0            | 0            | 0            | 0            |
| 0            | 0            | 0            | 1            | 0            | 0            | 0            |
| 1            | 0            | 1            | 0            | 0            | 0            | 0            |
| 1            | 0            | 0            | 1            | 0            | 0            | 1            |
| 1            | 0            | 0            | 1            | 1            | 0            | 1            |
| 1            | 1            | 1            | 0            | 0            | 0            | 0            |
| 0            | 1            | 0            | 0            | 0            | 0            | 0            |
| 1            | 0            | 0            | 2            | 1            | 0            | 1            |
| 0            | 2            | 2            | 0            | 0            | 0            | 0            |
| 0            | 0            | 0            | 0            | 0            | 0            | 1            |
| 0            | 1            | 1            | 1            | 1            | 0            | 0            |
| 0            | 1            | 1            | 1            | 1            | 0            | 1            |
| 1            | 0            | 1            | 1            | 0            | 0            | 1            |
| 1            | 0            | 1            | 1            | 0            | 0            | 0            |
| 1            | 0            | 1            | 0            | 0            | 0            | 1            |
| 1            | 0            | 1            | 0            | 0            | 0            | 1            |
| 1            | 0            | 1            | 0            | 0            | 0            | 1            |
| 1            | 0            | 1            | 0            | 0            | 0            | 1            |
| 1            | 0            | 1            | 0            | 0            | 0            | 1            |
| 0            | 0            | 1            | 0            | 0            | 0            | 1            |
| 0            | 0            | 1            | 0            | 1            | 0            | 0            |
| 1            | 0            | 1            | 0            | 0            | 0            | 1            |
| 0            | 1            | 1            | 0            | 0            | 0            | 1            |
| 1            | 0            | 0            | 0            | 0            | 0            | 1            |
| 1            | 0            | 0            | 0            | 0            | 0            | 1            |
| 0            | 0            | 1            | 0            | 0            | 0            | 0            |

| TCGA-G3-AAUZ | TCGA-G3-AAV0 | TCGA-G3-AAV1 | TCGA-G3-AAV2 | TCGA-G3-AAV3 | TCGA-G3-AAV4 | TCGA-G3-AAV5 | TCGA-G3-AAV6 |
|--------------|--------------|--------------|--------------|--------------|--------------|--------------|--------------|
| 1            | 1            | 1            | 0            | 1            | 1            | 2            | 1            |
| 0            | 1            | 1            | 2            | 1            | 1            | 2            | 1            |
| 2            | 0            | 2            | 1            | 1            | 0            | 2            | 1            |
| 0            | 0            | 2            | 0            | 1            | 2            | 0            | 0            |
| 2            | 0            | 2            | 1            | 0            | 0            | 1            | 1            |
| 0            | 0            | 1            | 0            | 1            | 2            | 0            | 1            |
| 1            | 0            | 2            | 0            | 0            | 0            | 1            | 1            |
| 0            | 0            | 2            | 0            | 0            | 0            | 1            | 0            |
| 0            | 0            | 1            | 0            | 0            | 0            | 0            | 1            |
| 0            | 0            | 1            | 0            | 0            | 0            | 0            | 1            |
| 0            | 0            | 1            | 0            | 0            | 0            | 1            | 1            |
| 0            | 0            | 1            | 0            | 0            | 0            | 0            | 0            |
| 0            | 1            | 0            | 0            | 0            | 0            | 0            | 0            |
| 0            | 2            | 0            | 1            | 1            | 0            | 1            | 0            |
| 0            | 0            | 0            | 0            | 0            | 0            | 0            | 0            |
| 1            | 1            | 0            | 1            | 0            | 1            | 1            | 1            |
| 1            | 1            | 0            | 1            | 0            | 1            | 1            | 1            |
| 1            | 0            | 1            | 0            | 0            | 1            | 1            | 0            |
| 1            | 0            | 0            | 0            | 0            | 1            | 0            | 0            |
| 0            | 1            | 1            | 1            | 0            | 1            | 0            | 1            |
| 0            | 0            | 1            | 0            | 0            | 1            | 0            | 1            |
| 0            | 0            | 1            | 0            | 0            | 1            | 0            | 1            |
| 0            | 0            | 1            | 0            | 0            | 0            | 0            | 1            |
| 1            | 0            | 0            | 0            | 0            | 0            | 0            | 1            |
| 0            | 0            | 1            | 0            | 1            | 0            | 0            | 1            |
| 0            | 0            | 1            | 0            | 0            | 0            | 0            | 1            |
| 0            | 0            | 1            | 0            | 1            | 1            | 0            | 1            |
| 0            | 0            | 1            | 0            | 1            | 0            | 0            | 0            |
| 0            | 0            | 1            | 0            | 0            | 0            | 0            | 0            |
| 0            | 0            | 1            | 0            | 0            | 0            | 0            | 0            |

| TCGA-G3-AAV7 | TCGA-GJ-A3OU | TCGA-GJ-A6C0 | TCGA-GJ-A9DB | TCGA-HP-A5MZ | TCGA-HP-A5N0 | TCGA-K7-A5RF | TCGA-K7-A5RG |
|--------------|--------------|--------------|--------------|--------------|--------------|--------------|--------------|
| 2            | 1            | 2            | 0            | 1            | 1            | 0            | 0            |
| 2            | 1            | 0            | 0            | 1            | 1            | 0            | 0            |
| 1            | 2            | 0            | 0            | 2            | 0            | 0            | 0            |
| 0            | 0            | 0            | 0            | 0            | 2            | 0            | 0            |
| 2            | 0            | 0            | 1            | 1            | 0            | 0            | 0            |
| 0            | 0            | 0            | 0            | 0            | 0            | 0            | 0            |
| 0            | 0            | 0            | 0            | 0            | 0            | 0            | 0            |
| 0            | 0            | 0            | 1            | 1            | 0            | 0            | 0            |
| 0            | 0            | 0            | 0            | 1            | 0            | 0            | 0            |
| 0            | 0            | 0            | 0            | 1            | 0            | 0            | 0            |
| 0            | 0            | 0            | 0            | 0            | 0            | 0            | 0            |
| 0            | 0            | 0            | 0            | 0            | 0            | 0            | 0            |
| 0            | 1            | 1            | 0            | 0            | 0            | 0            | 0            |
| 1            | 0            | 0            | 0            | 1            | 1            | 0            | 0            |
| 0            | 0            | 2            | 0            | 0            | 0            | 0            | 0            |
| 1            | 0            | 1            | 1            | 1            | 1            | 0            | 0            |
| 1            | 0            | 0            | 0            | 1            | 0            | 0            | 0            |
| 1            | 1            | 1            | 1            | 0            | 1            | 0            | 0            |
| 1            | 1            | 1            | 1            | 1            | 0            | 0            | 1            |
| 1            | 1            | 1            | 0            | 0            | 1            | 0            | 1            |
| 1            | 1            | 0            | 0            | 0            | 0            | 0            | 1            |
| 0            | 1            | 0            | 0            | 0            | 0            | 0            | 0            |
| 1            | 0            | 0            | 0            | 0            | 0            | 0            | 0            |
| 1            | 0            | 0            | 1            | 0            | 0            | 0            | 0            |
| 0            | 1            | 0            | 0            | 0            | 0            | 0            | 0            |
| 0            | 0            | 0            | 0            | 0            | 1            | 0            | 0            |
| 1            | 0            | 0            | 0            | 0            | 0            | 0            | 1            |
| 1            | 0            | 1            | 0            | 0            | 0            | 0            | 1            |
| 1            | 0            | 1            | 1            | 0            | 0            | 0            | 0            |



| TCGA-LG-A9QD | TCGA-MI-A75C | TCGA-MI-A75E | TCGA-MI-A75G | TCGA-MI-A75H | TCGA-MI-A75I | TCGA-MR-A520 | TCGA-MR-A8JO |
|--------------|--------------|--------------|--------------|--------------|--------------|--------------|--------------|
| 0            | 0            | 1            | 1            | 1            | 1            | 0            | 0            |
| 0            | 2            | 1            | 1            | 1            | 1            | 0            | 1            |
| 2            | 2            | 1            | 0            | 2            | 2            | 0            | 2            |
| 0            | 0            | 0            | 1            | 2            | 2            | 0            | 0            |
| 0            | 0            | 0            | 1            | 0            | 1            | 0            | 0            |
| 0            | 0            | 0            | 1            | 2            | 2            | 0            | 0            |
| 0            | 0            | 0            | 1            | 0            | 1            | 0            | 0            |
| 1            | 2            | 0            | 1            | 0            | 1            | 0            | 0            |
| 0            | 0            | 0            | 2            | 0            | 0            | 0            | 0            |
| 0            | 0            | 0            | 2            | 0            | 0            | 0            | 0            |
| 0            | 0            | 1            | 2            | 0            | 0            | 0            | 0            |
| 0            | 0            | 0            | 0            | 0            | 0            | 0            | 0            |
| 0            | 0            | 0            | 1            | 0            | 0            | 0            | 0            |
| 0            | 1            | 1            | 1            | 0            | 0            | 0            | 0            |
| 1            | 0            | 0            | 1            | 0            | 0            | 0            | 0            |
| 1            | 1            | 1            | 0            | 1            | 1            | 0            | 1            |
| 1            | 1            | 1            | 0            | 1            | 1            | 0            | 1            |
| 0            | 0            | 1            | 1            | 0            | 1            | 0            | 0            |
| 0            | 0            | 0            | 1            | 0            | 1            | 0            | 1            |
| 0            | 0            | 0            | 1            | 0            | 0            | 0            | 0            |
| 0            | 0            | 0            | 1            | 0            | 0            | 0            | 0            |
| 0            | 0            | 0            | 1            | 0            | 1            | 0            | 0            |
| 0            | 0            | 0            | 1            | 1            | 0            | 0            | 0            |
| 0            | 0            | 0            | 1            | 0            | 1            | 0            | 0            |
| 0            | 0            | 0            | 1            | 0            | 0            | 0            | 0            |
| 0            | 0            | 0            | 1            | 0            | 1            | 0            | 0            |
| 0            | 0            | 1            | 1            | 1            | 1            | 0            | 0            |
| 0            | 0            | 0            | 0            | 0            | 0            | 0            | 0            |
| 0            | 0            | 0            | 0            | 0            | 0            | 0            | 0            |
| 0            | 0            | 0            | 1            | 0            | 1            | 0            | 0            |

| TCGA-NI-A4U2 | TCGA-NI-A8LF | TCGA-O8-A75V | TCGA-PD-A5DF | TCGA-QA-A7B7 | TCGA-RC-A6M3 | TCGA-RC-A6M4 | TCGA-RC-A6M5 |
|--------------|--------------|--------------|--------------|--------------|--------------|--------------|--------------|
| 0            | 2            | 1            | 0            | 1            | 1            | 0            | 0            |
| 0            | 0            | 1            | 1            | 1            | 1            | 2            | 0            |
| 0            | 1            | 2            | 0            | 0            | 2            | 2            | 0            |
| 0            | 1            | 1            | 0            | 0            | 1            | 1            | 0            |
| 1            | 0            | 1            | 1            | 0            | 1            | 0            | 0            |
| 0            | 1            | 2            | 1            | 0            | 1            | 1            | 0            |
| 1            | 1            | 1            | 2            | 0            | 0            | 0            | 0            |
| 0            | 1            | 1            | 0            | 0            | 0            | 0            | 0            |
| 0            | 0            | 0            | 2            | 0            | 0            | 0            | 0            |
| 0            | 0            | 0            | 1            | 0            | 0            | 0            | 1            |
| 1            | 1            | 0            | 0            | 0            | 1            | 0            | 0            |
| 0            | 0            | 1            | 0            | 0            | 1            | 1            | 0            |
| 0            | 1            | 0            | 1            | 0            | 1            | 0            | 0            |
| 2            | 0            | 1            | 0            | 0            | 0            | 2            | 0            |
| 0            | 0            | 0            | 1            | 0            | 0            | 0            | 0            |
| 1            | 1            | 1            | 1            | 1            | 1            | 1            | 0            |
| 0            | 1            | 1            | 1            | 1            | 1            | 1            | 0            |
| 1            | 1            | 1            | 1            | 1            | 1            | 1            | 1            |
| 0            | 1            | 0            | 1            | 0            | 1            | 1            | 1            |
| 0            | 0            | 1            | 0            | 0            | 1            | 0            | 0            |
| 0            | 0            | 1            | 0            | 0            | 1            | 0            | 0            |
| 1            | 1            | 0            | 0            | 0            | 1            | 0            | 0            |
| 0            | 0            | 1            | 0            | 0            | 0            | 1            | 0            |
| 0            | 1            | 1            | 0            | 1            | 0            | 0            | 0            |
| 0            | 1            | 0            | 0            | 0            | 0            | 1            | 1            |
| 0            | 0            | 0            | 0            | 0            | 0            | 0            | 0            |
| 0            | 1            | 0            | 0            | 0            | 0            | 1            | 0            |
| 0            | 1            | 0            | 0            | 1            | 0            | 0            | 1            |
| 0            | 1            | 0            | 1            | 0            | 0            | 0            | 1            |
| 0            | 0            | 0            | 1            | 0            | 0            | 0            | 1            |

| TCGA-RC-A6M6 | TCGA-RC-A7S9 | TCGA-RC-A7SB | TCGA-RC-A7SF | TCGA-RC-A7SH | TCGA-RC-A7SK | TCGA-RG-A7D4 | TCGA-TI-A6J8 |
|--------------|--------------|--------------|--------------|--------------|--------------|--------------|--------------|
| 0            | 1            | 0            | 0            | 2            | 1            | 1            | 1            |
| 0            | 2            | 0            | 1            | 2            | 0            | 1            | 1            |
| 2            | 0            | 0            | 2            | 1            | 2            | 2            | 0            |
| 0            | 1            | 0            | 0            | 0            | 1            | 1            | 0            |
| 0            | 0            | 0            | 2            | 0            | 0            | 1            | 0            |
| 0            | 1            | 0            | 0            | 0            | 1            | 1            | 0            |
| 1            | 0            | 0            | 0            | 0            | 0            | 1            | 0            |
| 0            | 0            | 0            | 1            | 0            | 0            | 1            | 0            |
| 1            | 0            | 0            | 0            | 0            | 0            | 1            | 0            |
| 1            | 0            | 0            | 0            | 0            | 0            | 1            | 0            |
| 2            | 2            | 0            | 0            | 0            | 0            | 0            | 0            |
| 0            | 0            | 0            | 0            | 0            | 1            | 1            | 1            |
| 0            | 1            | 0            | 0            | 1            | 0            | 0            | 0            |
| 0            | 0            | 0            | 0            | 0            | 0            | 0            | 0            |
| 0            | 0            | 0            | 0            | 0            | 0            | 0            | 0            |
| 1            | 1            | 0            | 1            | 0            | 1            | 1            | 1            |
| 1            | 1            | 0            | 1            | 1            | 1            | 1            | 1            |
| 1            | 0            | 1            | 0            | 1            | 1            | 1            | 1            |
| 0            | 1            | 0            | 1            | 1            | 1            | 1            | 0            |
| 0            | 0            | 1            | 0            | 1            | 1            | 1            | 1            |
| 0            | 0            | 1            | 0            | 1            | 1            | 1            | 1            |
| 0            | 0            | 1            | 0            | 1            | 1            | 1            | 1            |
| 0            | 0            | 1            | 0            | 1            | 1            | 1            | 1            |
| 0            | 1            | 0            | 0            | 1            | 1            | 1            | 1            |
| 0            | 0            | 1            | 1            | 1            | 0            | 1            | 1            |
| 1            | 1            | 1            | 1            | 1            | 1            | 1            | 1            |
| 1            | 0            | 0            | 0            | 1            | 1            | 1            | 1            |
| 1            | 0            | 0            | 0            | 0            | 1            | 0            | 1            |
| 0            | 0            | 0            | 0            | 1            | 1            | 1            | 0            |
| 0            | 0            | 0            | 1            | 1            | 1            | 1            | 0            |
| 1            | 0            | 1            | 0            | 1            | 1            | 1            | 1            |

| TCGA-UB-A7MA | TCGA-UB-A7MB | TCGA-UB-A7MC | TCGA-UB-A7MD | TCGA-UB-A7ME | TCGA-UB-A7MF | TCGA-UB-AA0U |
|--------------|--------------|--------------|--------------|--------------|--------------|--------------|
| 2            | 2            | 2            | 1            | 2            | 1            | 1            |
| 1            | 0            | 2            | 1            | 2            | 1            | 1            |
| 1            | 0            | 1            | 1            | 2            | 0            | 2            |
| 1            | 1            | 1            | 0            | 1            | 1            | 2            |
| 0            | 0            | 0            | 0            | 2            | 1            | 2            |
| 1            | 1            | 1            | 0            | 1            | 1            | 2            |
| 1            | 0            | 1            | 0            | 0            | 0            | 1            |
| 1            | 0            | 0            | 0            | 0            | 0            | 0            |
| 1            | 1            | 0            | 0            | 1            | 0            | 1            |
| 1            | 1            | 0            | 0            | 1            | 0            | 1            |
| 0            | 0            | 0            | 1            | 0            | 0            | 1            |
| 2            | 0            | 1            | 0            | 2            | 1            | 1            |
| 0            | 0            | 0            | 0            | 1            | 0            | 0            |
| 0            | 0            | 0            | 0            | 1            | 0            | 0            |
| 0            | 0            | 1            | 1            | 0            | 0            | 0            |
| 0            | 1            | 0            | 1            | 1            | 1            | 1            |
| 1            | 1            | 0            | 1            | 1            | 1            | 1            |
| 0            | 1            | 1            | 1            | 1            | 1            | 1            |
| 1            | 0            | 1            | 0            | 0            | 1            | 1            |
| 0            | 1            | 1            | 0            | 1            | 1            | 0            |
| 0            | 1            | 1            | 0            | 1            | 1            | 0            |
| 0            | 1            | 1            | 0            | 1            | 1            | 0            |
| 1            | 0            | 1            | 0            | 1            | 1            | 1            |
| 1            | 1            | 0            | 0            | 0            | 1            | 1            |
| 0            | 0            | 0            | 0            | 1            | 1            | 1            |
| 1            | 0            | 1            | 0            | 0            | 1            | 1            |
| 0            | 1            | 0            | 0            | 1            | 0            | 1            |
| 1            | 1            | 1            | 0            | 0            | 1            | 0            |
| 0            | 0            | 1            | 0            | 0            | 1            | 0            |
| 0            | 1            | 0            | 0            | 1            | 1            | 1            |



| TCGA-UB-AA0V | TCGA-WJ-A86L | TCGA-WQ-A9G7 | TCGA-WQ-AB4B | TCGA-WX-AA44 | TCGA-WX-AA46 | TCGA-WX-AA47 |
|--------------|--------------|--------------|--------------|--------------|--------------|--------------|
| 0            | 2            | 1            | 1            | 2            | 0            | 2            |
| 0            | 1            | 1            | 1            | 2            | 0            | 2            |
| 0            | 0            | 2            | 2            | 1            | 0            | 0            |
| 0            | 0            | 1            | 0            | 1            | 0            | 0            |
| 0            | 0            | 1            | 1            | 0            | 0            | 2            |
| 0            | 1            | 1            | 0            | 2            | 0            | 0            |
| 0            | 0            | 0            | 0            | 0            | 0            | 0            |
| 0            | 0            | 1            | 1            | 0            | 0            | 2            |
| 0            | 0            | 1            | 1            | 0            | 0            | 0            |
| 0            | 0            | 1            | 1            | 0            | 0            | 0            |
| 0            | 0            | 1            | 1            | 0            | 0            | 0            |
| 0            | 0            | 1            | 1            | 0            | 1            | 0            |
| 0            | 0            | 1            | 0            | 0            | 0            | 0            |
| 0            | 0            | 1            | 1            | 0            | 0            | 0            |
| 0            | 2            | 0            | 0            | 1            | 0            | 0            |
| 0            | 1            | 1            | 1            | 1            | 0            | 0            |
| 0            | 1            | 1            | 1            | 1            | 0            | 1            |
| 0            | 1            | 0            | 1            | 1            | 0            | 0            |
| 0            | 1            | 0            | 0            | 1            | 0            | 1            |
| 0            | 0            | 1            | 1            | 1            | 0            | 0            |
| 0            | 0            | 1            | 1            | 1            | 0            | 0            |
| 0            | 0            | 1            | 1            | 1            | 0            | 0            |
| 0            | 0            | 1            | 1            | 1            | 0            | 0            |
| 0            | 0            | 1            | 1            | 0            | 0            | 0            |
| 0            | 0            | 1            | 1            | 0            | 0            | 0            |
| 0            | 0            | 1            | 1            | 0            | 0            | 0            |
| 0            | 1            | 0            | 0            | 0            | 0            | 0            |
| 0            | 1            | 1            | 1            | 1            | 0            | 0            |
| 0            | 0            | 1            | 1            | 1            | 0            | 0            |
| 0            | 0            | 0            | 1            | 1            | 0            | 0            |
| 0            | 0            | 0            | 1            | 0            | 0            | 0            |

| TCGA-XR-A8TD | TCGA-XR-A8TE | TCGA-XR-A8TF | TCGA-XR-A8TG | TCGA-YA-A8S7 | TCGA-ZP-A9CV | TCGA-ZP-A9CY | TCGA-ZP-A9CZ |
|--------------|--------------|--------------|--------------|--------------|--------------|--------------|--------------|
| 1            | 1            | 2            | 2            | 2            | 2            | 0            | 2            |
| 1            | 0            | 2            | 1            | 0            | 2            | 1            | 1            |
| 0            | 0            | 0            | 0            | 2            | 1            | 0            | 0            |
| 1            | 1            | 1            | 0            | 1            | 0            | 0            | 0            |
| 0            | 0            | 1            | 1            | 0            | 0            | 0            | 2            |
| 1            | 1            | 1            | 1            | 1            | 0            | 0            | 0            |
| 1            | 0            | 0            | 0            | 0            | 0            | 0            | 1            |
| 0            | 0            | 1            | 0            | 0            | 0            | 0            | 1            |
| 1            | 0            | 1            | 1            | 1            | 0            | 0            | 0            |
| 1            | 0            | 1            | 2            | 1            | 0            | 0            | 0            |
| 0            | 1            | 1            | 0            | 1            | 0            | 0            | 0            |
| 1            | 1            | 1            | 0            | 1            | 0            | 0            | 0            |
| 0            | 0            | 0            | 1            | 1            | 0            | 0            | 0            |
| 0            | 1            | 0            | 0            | 0            | 1            | 0            | 0            |
| 0            | 0            | 0            | 1            | 0            | 0            | 0            | 0            |
| 1            | 0            | 0            | 1            | 1            | 1            | 0            | 1            |
| 1            | 0            | 0            | 1            | 1            | 1            | 0            | 1            |
| 1            | 0            | 0            | 1            | 1            | 0            | 0            | 0            |
| 1            | 0            | 1            | 1            | 1            | 0            | 1            | 1            |
| 0            | 0            | 1            | 1            | 1            | 0            | 0            | 0            |
| 0            | 0            | 1            | 1            | 1            | 0            | 0            | 0            |
| 0            | 0            | 1            | 0            | 1            | 0            | 0            | 0            |
| 0            | 0            | 1            | 0            | 0            | 0            | 1            | 1            |
| 1            | 0            | 1            | 0            | 0            | 0            | 0            | 1            |
| 0            | 0            | 1            | 0            | 0            | 0            | 0            | 0            |
| 0            | 0            | 1            | 0            | 0            | 0            | 0            | 1            |
| 0            | 0            | 0            | 1            | 0            | 0            | 0            | 0            |
| 0            | 0            | 0            | 0            | 0            | 0            | 0            | 0            |
| 0            | 0            | 1            | 1            | 0            | 0            | 0            | 0            |
| 1            | 0            | 0            | 0            | 0            | 0            | 0            | 1            |

| TCGA-ZP-A9D0 | TCGA-ZP-A9D1 | TCGA-ZP-A9D2 | TCGA-ZP-A9D4 | TCGA-ZS-A9CD | TCGA-ZS-A9CE | TCGA-ZS-A9CF | TCGA-ZS-A9CG |
|--------------|--------------|--------------|--------------|--------------|--------------|--------------|--------------|
| 2            | 2            | 1            | 1            | 1            | 0            | 0            | 1            |
| 2            | 2            | 1            | 1            | 1            | 1            | 0            | 1            |
| 0            | 0            | 0            | 2            | 2            | 0            | 0            | 2            |
| 0            | 0            | 0            | 0            | 1            | 0            | 2            | 0            |
| 0            | 1            | 2            | 2            | 0            | 1            | 0            | 0            |
| 0            | 0            | 0            | 0            | 1            | 0            | 2            | 0            |
| 0            | 0            | 1            | 2            | 0            | 0            | 2            | 0            |
| 0            | 1            | 0            | 0            | 0            | 1            | 0            | 0            |
| 0            | 0            | 0            | 0            | 1            | 0            | 0            | 0            |
| 0            | 0            | 0            | 0            | 1            | 0            | 0            | 0            |
| 0            | 1            | 0            | 0            | 0            | 0            | 0            | 0            |
| 0            | 0            | 0            | 0            | 1            | 0            | 2            | 0            |
| 0            | 1            | 0            | 0            | 0            | 0            | 2            | 0            |
| 0            | 0            | 0            | 0            | 1            | 0            | 0            | 1            |
| 0            | 0            | 0            | 0            | 0            | 0            | 2            | 0            |
| 1            | 0            | 1            | 1            | 1            | 1            | 1            | 1            |
| 1            | 0            | 1            | 1            | 1            | 1            | 1            | 1            |
| 0            | 1            | 1            | 1            | 0            | 1            | 1            | 0            |
| 1            | 0            | 0            | 0            | 0            | 1            | 0            | 1            |
| 0            | 0            | 1            | 0            | 0            | 1            | 0            | 0            |
| 0            | 0            | 1            | 0            | 0            | 1            | 0            | 0            |
| 0            | 0            | 1            | 0            | 0            | 1            | 0            | 0            |
| 0            | 1            | 0            | 0            | 0            | 1            | 0            | 0            |
| 0            | 1            | 0            | 0            | 0            | 0            | 0            | 1            |
| 1            | 1            | 1            | 0            | 0            | 0            | 0            | 0            |
| 0            | 1            | 0            | 0            | 0            | 0            | 0            | 0            |
| 0            | 0            | 0            | 0            | 0            | 1            | 1            | 0            |
| 1            | 0            | 1            | 0            | 0            | 0            | 0            | 0            |
| 0            | 0            | 1            | 0            | 0            | 0            | 0            | 0            |
| 1            | 0            | 1            | 0            | 0            | 1            | 1            | 0            |

**Table S10. Methylation driven genes in two MSCs.**

| <b>ID</b> | <b>Corr</b> | <b>P</b>  | <b>Corr1</b> | <b>Pval1</b> | <b>Corr2</b> | <b>P</b>  | <b>Beta-mean1</b> | <b>Beta-mean2</b> | <b>Beta.KW.test.P</b> | <b>Beta.Sig</b> |
|-----------|-------------|-----------|--------------|--------------|--------------|-----------|-------------------|-------------------|-----------------------|-----------------|
| ACSL5     | -0.730059   | 5.75E-59  | -0.716798    | 1.03E-35     | -0.755264    | 1.75E-24  | 0.171179865       | 0.215227563       | 0.034082623           | *               |
| APOL3     | -0.528918   | 1.44E-26  | -0.518647    | 1.71E-16     | -0.536794    | 8.54E-11  | 0.098107227       | 0.099008422       | 0.891020799           |                 |
| C14orf159 | -0.406876   | 1.96E-15  | -0.42088     | 6.77E-11     | -0.377634    | 1.13E-05  | 0.141350178       | 0.147255809       | 0.290214592           |                 |
| C3orf18   | -0.417594   | 3.13E-16  | -0.384522    | 3.17E-09     | -0.455864    | 9.76E-08  | 0.083792038       | 0.102139954       | 0.070991104           |                 |
| CA14      | -0.75754    | 1.16E-65  | -0.739829    | 4.74E-39     | -0.776303    | 0         | 0.159200983       | 0.185648991       | 0.064400084           |                 |
| CCNI2     | -0.52886    | 1.44E-26  | -0.551929    | 6.97E-19     | -0.486742    | 7.05E-09  | 0.153492254       | 0.147398733       | 0.73500905            |                 |
| CD14      | -0.414171   | 5.56E-16  | -0.381111    | 4.33E-09     | -0.460671    | 4.95E-08  | 0.135731999       | 0.161931921       | 0.132609746           |                 |
| CDO1      | -0.533053   | 5.27E-27  | -0.473817    | 9.86E-14     | -0.630452    | 2.37E-15  | 0.123381322       | 0.186912574       | 0.003069761           | **              |
| DMRTA1    | -0.415756   | 4.27E-16  | -0.313563    | 1.77E-06     | -0.575805    | 0         | 0.1457733         | 0.170612492       | 0.144730478           |                 |
| EPCAM     | -0.686788   | 7.70E-50  | -0.667186    | 1.28E-29     | -0.701726    | 5.54E-20  | 0.304099334       | 0.252561109       | 0.008918712           | **              |
| FAM169A   | -0.543559   | 3.49E-28  | -0.489209    | 1.21E-14     | -0.598407    | 0         | 0.127249783       | 0.176367252       | 0.003146175           | **              |
| FXYD1     | -0.767535   | 5.73E-68  | -0.75709     | 1.36E-41     | -0.763993    | 0         | 0.240630171       | 0.278691335       | 0.044463022           | *               |
| GALC      | -0.695895   | 1.47E-51  | -0.729973    | 1.36E-37     | -0.650049    | 1.83E-16  | 0.166726053       | 0.200328505       | 0.132609719           |                 |
| GIPC2     | -0.556912   | 9.77E-30  | -0.494036    | 6.16E-15     | -0.630484    | 0         | 0.102489623       | 0.146752951       | 0.007264424           | **              |
| GREB1L    | -0.489216   | 1.73E-22  | -0.40307     | 4.92E-10     | -0.639977    | 0         | 0.173415348       | 0.219295727       | 0.005385291           | **              |
| HIST3H2A  | -0.531935   | 6.86E-27  | -0.473596    | 9.91E-14     | -0.61503     | 1.63E-14  | 0.275267905       | 0.265181505       | 0.43516937            |                 |
| IFITM1    | -0.675867   | 8.78E-48  | -0.681928    | 2.33E-31     | -0.652993    | 1.24E-16  | 0.290924844       | 0.315330918       | 0.276604869           |                 |
| IGF1      | -0.722253   | 3.35E-57  | -0.700606    | 1.17E-33     | -0.738803    | 0         | 0.197453054       | 0.242075453       | 0.04457785            | *               |
| KCNJ8     | -0.421965   | 1.45E-16  | -0.387926    | 2.28E-09     | -0.474903    | 1.77E-08  | 0.108818095       | 0.181410631       | 0.080347857           |                 |
| KCNT2     | -0.386675   | 5.24E-14  | -0.398437    | 1.11E-09     | -0.369438    | 1.75E-05  | 0.092701459       | 0.134464483       | 0.15928109            |                 |
| KCTD14    | -0.396794   | 1.02E-14  | -0.332559    | 3.72E-07     | -0.487517    | 1.01E-08  | 0.120273803       | 0.173509502       | 0.010600986           | *               |
| LIPG      | -0.550283   | 5.87E-29  | -0.530285    | 0            | -0.602227    | 7.77E-14  | 0.089414097       | 0.141119609       | 0.027707102           | *               |
| MCHR1     | -0.373244   | 4.26E-13  | -0.374012    | 8.67E-09     | -0.368281    | 1.84E-05  | 0.098171937       | 0.143231396       | 0.000502404           | ***             |
| MT1E      | -0.692857   | 5.05E-51  | -0.68665     | 6.93E-32     | -0.680389    | 0         | 0.136179684       | 0.169829237       | 0.003956642           | **              |
| NKAPL     | -0.54525    | 2.27E-28  | -0.499653    | 2.76E-15     | -0.626376    | 3.95E-15  | 0.435454565       | 0.428489354       | 0.88075681            |                 |
| NQO1      | -0.658047   | 1.45E-44  | -0.684247    | 1.29E-31     | -0.636009    | 1.19E-15  | 0.307334002       | 0.246056396       | 0.02824785            | *               |
| NSUN7     | -0.620528   | 1.73E-38  | -0.602033    | 4.91E-23     | -0.6544      | 0         | 0.291197812       | 0.279628958       | 0.511940317           |                 |
| OAS2      | -0.482042   | 8.51E-22  | -0.483456    | 2.69E-14     | -0.48771     | 6.65E-09  | 0.10432789        | 0.131441888       | 0.038217033           | *               |
| OSCP1     | -0.428749   | 4.22E-17  | -0.468677    | 1.89E-13     | -0.341031    | 7.90E-05  | 0.112212946       | 0.119250233       | 0.1328889             |                 |
| P2RX7     | -0.433388   | 1.80E-17  | -0.391995    | 1.55E-09     | -0.506928    | 1.31E-09  | 0.117667769       | 0.135343058       | 0.269026347           |                 |
| PALMD     | -0.399481   | 6.61E-15  | -0.252137    | 0.000141     | -0.61993     | 8.93E-15  | 0.118206981       | 0.169459164       | 0.01452446            | *               |
| PHYHD1    | -0.755155   | 3.82E-65  | -0.711767    | 0            | -0.805339    | 0         | 0.140061596       | 0.177186575       | 0.064556521           |                 |
| RAB3D     | -0.76542    | 1.14E-67  | -0.754347    | 2.39E-41     | -0.78454     | 1.57E-27  | 0.341335002       | 0.282330671       | 0.067914808           |                 |
| RANBP3L   | -0.537008   | 1.97E-27  | -0.566258    | 5.52E-20     | -0.464997    | 3.77E-08  | 0.13089634        | 0.156253531       | 0.105979211           |                 |
| RARRES3   | -0.109375   | 0.0399912 | -0.023438    | 0.727184     | -0.228913    | 0.0091987 | 0.106325622       | 0.149493284       | 0.003339025           | **              |
| RTP3      | -0.646295   | 1.42E-42  | -0.635043    | 3.29E-26     | -0.643538    | 0         | 0.131274506       | 0.17016959        | 0.005457638           | **              |
| SERPINA3  | -0.385886   | 5.85E-14  | -0.390482    | 1.78E-09     | -0.42419     | 6.23E-07  | 0.173233206       | 0.203534747       | 0.105745442           |                 |

|                 |           |          |           |           |           |          |             |             |             |    |
|-----------------|-----------|----------|-----------|-----------|-----------|----------|-------------|-------------|-------------|----|
| <b>SLC16A1</b>  | -0.291718 | 2.40E-08 | -0.222468 | 0.0008119 | -0.402763 | 2.50E-06 | 0.091233481 | 0.12568179  | 0.26996579  |    |
| <b>SLC1A4</b>   | -0.472756 | 6.37E-21 | -0.434602 | 1.39E-11  | -0.515262 | 9.10E-10 | 0.084553031 | 0.134284728 | 0.057109471 |    |
| <b>SLC25A36</b> | -0.523623 | 5.40E-26 | -0.365617 | 1.90E-08  | -0.726973 | 6.01E-22 | 0.273736304 | 0.228452183 | 0.007625283 | ** |
| <b>SLC2A10</b>  | -0.492978 | 7.83E-23 | -0.344624 | 1.31E-07  | -0.712314 | 8.53E-21 | 0.107932999 | 0.152096085 | 0.040386473 | *  |
| <b>SLC46A3</b>  | -0.5177   | 2.28E-25 | -0.480877 | 3.78E-14  | -0.577309 | 0        | 0.083214251 | 0.109613277 | 0.130392827 |    |
| <b>SNX7</b>     | -0.521105 | 9.95E-26 | -0.507312 | 8.88E-16  | -0.539164 | 6.94E-11 | 0.092217516 | 0.098324028 | 0.147434933 |    |
| <b>SP140L</b>   | -0.490291 | 1.39E-22 | -0.445643 | 3.73E-12  | -0.564047 | 5.56E-12 | 0.124157672 | 0.138159655 | 0.500852448 |    |
| <b>SPINT2</b>   | -0.556697 | 9.99E-30 | -0.427524 | 3.18E-11  | -0.736319 | 9.67E-23 | 0.396263762 | 0.352012603 | 0.102972015 |    |
| <b>TAT</b>      | -0.535487 | 2.86E-27 | -0.50788  | 8.38E-16  | -0.571769 | 2.48E-12 | 0.123708004 | 0.166210787 | 0.002489887 | ** |
| <b>TDRKH</b>    | -0.404312 | 3.00E-15 | -0.381183 | 4.33E-09  | -0.432022 | 3.70E-07 | 0.10462557  | 0.149818726 | 0.010750377 | *  |
| <b>TMEM106A</b> | -0.74283  | 4.99E-62 | -0.755947 | 1.60E-41  | -0.719206 | 2.45E-21 | 0.351624133 | 0.298452219 | 0.141476847 |    |
| <b>TRAM1L1</b>  | -0.510304 | 1.38E-24 | -0.578803 | 5.25E-21  | -0.372261 | 1.52E-05 | 0.122959917 | 0.118279542 | 0.683428865 |    |
| <b>TRPC1</b>    | -0.494871 | 5.18E-23 | -0.515552 | 2.70E-16  | -0.462805 | 4.37E-08 | 0.133218722 | 0.154759596 | 0.957242986 |    |
| <b>XAF1</b>     | -0.388637 | 3.87E-14 | -0.440696 | 6.75E-12  | -0.318968 | 0.000233 | 0.135598281 | 0.173432935 | 0.041347713 | *  |
| <b>ZDHHC13</b>  | -0.598597 | 3.01E-35 | -0.545091 | 2.24E-18  | -0.668553 | 1.24E-17 | 0.119504102 | 0.131684004 | 0.719558471 |    |
| <b>ZNF300</b>   | -0.565117 | 9.50E-31 | -0.530655 | 2.51E-17  | -0.628231 | 0        | 0.209469206 | 0.213658086 | 0.705025905 |    |
| <b>ZNF43</b>    | -0.708165 | 4.18E-54 | -0.70708  | 1.87E-34  | -0.719782 | 2.30E-21 | 0.188778486 | 0.199055082 | 0.440927199 |    |
| <b>ZNF433</b>   | -0.403165 | 3.59E-15 | -0.367532 | 1.61E-08  | -0.458799 | 8.05E-08 | 0.111472149 | 0.131138166 | 0.050391311 |    |
| <b>ZNF470</b>   | -0.667145 | 3.51E-46 | -0.646669 | 2.41E-27  | -0.688635 | 0        | 0.11314025  | 0.135875234 | 0.286280905 |    |
| <b>ZNF471</b>   | -0.693863 | 3.46E-51 | -0.706717 | 1.91E-34  | -0.660247 | 0        | 0.202376496 | 0.233647237 | 0.130668359 |    |
| <b>ZNF492</b>   | -0.507992 | 2.37E-24 | -0.559769 | 1.76E-19  | -0.439565 | 2.22E-07 | 0.244340967 | 0.278482016 | 0.026357424 | *  |
| <b>ZNF525</b>   | -0.651954 | 1.60E-43 | -0.638306 | 1.67E-26  | -0.677559 | 3.12E-18 | 0.169188471 | 0.166709598 | 0.987469733 |    |
| <b>ZNF551</b>   | -0.49258  | 8.39E-23 | -0.509609 | 6.62E-16  | -0.461327 | 4.80E-08 | 0.087292011 | 0.089365795 | 0.586262761 |    |
| <b>ZNF665</b>   | -0.64121  | 9.63E-42 | -0.63699  | 2.17E-26  | -0.648645 | 2.16E-16 | 0.245142044 | 0.259031198 | 0.74482332  |    |
| <b>ZNF829</b>   | -0.684981 | 1.62E-49 | -0.714739 | 1.79E-35  | -0.631839 | 2.03E-15 | 0.140319172 | 0.13623952  | 0.998703713 |    |
| <b>ZNF879</b>   | -0.627378 | 1.62E-39 | -0.643792 | 4.63E-27  | -0.595162 | 1.77E-13 | 0.155803232 | 0.172848482 | 0.194998279 |    |
| <b>ZNF93</b>    | -0.626315 | 2.27E-39 | -0.614125 | 3.78E-24  | -0.641501 | 5.74E-16 | 0.17915586  | 0.204032103 | 0.08319797  |    |

Notes: \* $P < 0.05$ , \*\* $P < 0.01$ , \*\*\* $P < 0.001$

| <b>Zscore-mean1</b> | <b>Zscore-mean2</b> | <b>Zscore.KW.test.P</b> |
|---------------------|---------------------|-------------------------|
| 0.072814913         | -0.126438299        | 0.238609184             |
| 0.012205338         | -0.021193766        | 0.841961332             |
| -0.006091975        | 0.010578314         | 0.893963694             |
| 0.092772042         | -0.161092538        | 0.140128268             |
| 0.081837074         | -0.142104686        | 0.188985319             |
| -0.020424643        | 0.035466047         | 0.753513555             |
| 0.043332533         | -0.075244088        | 0.508046103             |
| 0.08064034          | -0.140026637        | 0.238609184             |
| 0.113197545         | -0.196560078        | 0.084708262             |
| -0.119990975        | 0.208356422         | 0.072510539             |
| 0.070744098         | -0.122842465        | 0.238609184             |
| 0.050328267         | -0.087391719        | 0.41917156              |
| 0.040329822         | -0.070030078        | 0.541760827             |
| 0.094421574         | -0.163956841        | 0.142654223             |
| 0.071166596         | -0.123576105        | 0.238609184             |
| -0.10135449         | 0.175995393         | 0.136577327             |
| -0.007536835        | 0.013087217         | 0.87557797              |
| 0.08144027          | -0.141415663        | 0.188985319             |
| 0.057345773         | -0.099577156        | 0.351930186             |
| 0.057486722         | -0.099821904        | 0.339981011             |
| 0.094842315         | -0.164687431        | 0.140128268             |
| 0.105021026         | -0.182362092        | 0.117487357             |
| 0.070500213         | -0.122418975        | 0.250450123             |
| 0.067490177         | -0.117192245        | 0.238609184             |
| -0.015542287        | 0.026988157         | 0.800970457             |
| -0.038309928        | 0.066522666         | 0.565105299             |
| -0.063953626        | 0.111051258         | 0.309902179             |
| 0.017005147         | -0.029528317        | 0.772425159             |
| 0.049380955         | -0.085746775        | 0.455095994             |
| 0.023666169         | -0.041094742        | 0.753513555             |
| 0.118440649         | -0.205664383        | 0.072510539             |
| 0.070991423         | -0.123271929        | 0.238609184             |
| -0.095753185        | 0.166269097         | 0.142654223             |
| 0.021877977         | -0.037989665        | 0.753513555             |
| 0.032848606         | -0.057039441        | 0.654971905             |
| 0.05763155          | -0.100073389        | 0.339830136             |
| -0.064919332        | 0.112728142         | 0.284785265             |

|              |              |             |
|--------------|--------------|-------------|
| 0.093525282  | -0.16240049  | 0.157791997 |
| 0.081112686  | -0.140846835 | 0.218588622 |
| -0.194967334 | 0.338547929  | 0.000916023 |
| 0.027504334  | -0.047759465 | 0.692600022 |
| 0.02863203   | -0.049717634 | 0.692600022 |
| 0.036948438  | -0.064158528 | 0.581870347 |
| 0.045833409  | -0.079586695 | 0.508046103 |
| -0.131228947 | 0.22787042   | 0.072510539 |
| 0.070962472  | -0.123221656 | 0.238609184 |
| 0.074208576  | -0.128858302 | 0.238609184 |
| -0.026012318 | 0.045168677  | 0.692600022 |
| 0.021107777  | -0.036652264 | 0.753513555 |
| 0.007891494  | -0.01370306  | 0.87557797  |
| 0.020477026  | -0.035557007 | 0.753513555 |
| -0.077841053 | 0.13516586   | 0.238609184 |
| -0.04409541  | 0.076568774  | 0.508046103 |
| -0.027885424 | 0.048421201  | 0.692600022 |
| 0.061203802  | -0.106276369 | 0.309902179 |
| 0.018678028  | -0.032433164 | 0.769383307 |
| 0.020178414  | -0.035038486 | 0.753513555 |
| 0.01453064   | -0.0252315   | 0.806315744 |
| -0.000668865 | 0.00116144   | 0.986994851 |
| -0.042566161 | 0.073913333  | 0.508046103 |
| -0.031251043 | 0.054265377  | 0.676963576 |
| 0.009939732  | -0.01725969  | 0.869309401 |
| -0.00853284  | 0.014816714  | 0.87557797  |
| 0.029430176  | -0.051103561 | 0.692600022 |

---

**Table S11. Candidate drugs screened through CTRP, PRISM, Cmap databases for two MSCs.**

| MSC | CTRP/PRISM | Cmap Score | Targets                                                                             | Log2FC of mRNA expression | Log2FC of protien expression |
|-----|------------|------------|-------------------------------------------------------------------------------------|---------------------------|------------------------------|
| 1   | ALL        | -10.76     | EGFR;ERBB2;ERBB4                                                                    | 0.5991997                 | 0.04054141                   |
| 1   | ALL        | -71.43     | EGFR;ERBB2                                                                          | 0.5991997                 | 0.04054141                   |
| 1   | CTRP       | 3.19       | EPHA2;KIT;SRC;YES1;ABL1;ABL2;BLK;LYN;FGR;FGK;<br>FYN;HCK;LCK;SRC;SRMS;PDGFRB;STAT5B | 0.30189562                | 0.040219875                  |
| 1   | PRISM      | -26.75     | JUN;TUBA1A;TUBB;TUBD1;TUBE1;TUBG1                                                   | 0.30356412                | NA                           |
| 2   | PRISM      | NA         | ANPEP; LAP3; NPEPPS                                                                 | 0.11119459                | NA                           |
| 2   | CTRP       | NA         | SRC                                                                                 | 0.33680999                | 0.003098543                  |

| Description                           | Clinical status | Exprimental evidence | PMID               | Clinical trail |
|---------------------------------------|-----------------|----------------------|--------------------|----------------|
| EGFR inhibitor                        | Launched        | Present              | 31432165, 33824166 |                |
| EGFR inhibitor                        | Phase 3         | Present              | 21982771           |                |
| BCR-ABL kinase inhibitor              | Phase 2         | Present              | 23299860           | NCT00459108    |
| Microtubule inhibitor                 | Preclinical     | Present              | 22285225           |                |
| bioavailable aminopeptidase inhibitor | Phase 2         | Present              | 33043735, 20733120 |                |
| Src inhibitor                         | Phase 2         | Present              | 23361621, 23314737 |                |
